# Supplementary material for: The Gene Expression Profile Differs in Growth Phases of the Bifidobacterium Longum Culture
Source: Microorganisms. 2022 Aug 21;10(8):1683. doi: 10.3390/microorganisms10081683 (PMC9415070; doi:10.3390/microorganisms10081683)
Supplement: Supplementary file 1 [file microorganisms-10-01683-s001.zip › Table S1.xlsx]

## Sheet: Full info K01 K05 K09
locus_tag	Old_annotation	name		FC_GT15_ex to GT15_lag	FC_GT15_st to GT15_lag	FC GT15_st to GT15_ex	# feature	class	assembly	assembly_unit	seq_type	chromosome	genomic_accession	start	end	strand	product_accession	non-redundant_refseq	related_accession	symbol	GeneID	feature_interval_length	product_length	attributes
BLGT_RS00625	BLGT_00625	Hsp20/alpha crystallin family protein	1631294		86.18	77.1565	CDS	with_protein	GCF_000772485.1	Primary Assembly	chromosome		NZ_CP006741.1	159848	160351	+	WP_007055906.1	WP_007055906.1				504	167
BLGT_RS07530	BLGT_07725	WXG100 family type VII secretion target	-640062	2.48407	31.3675	12.6274	CDS	with_protein	GCF_000772485.1	Primary Assembly	chromosome		NZ_CP006741.1	1791645	1791935	+	WP_007053189.1	WP_007053189.1				291	96
BLGT_RS10120		hypothetical protein	639809	-11.2356		8.86015	CDS	with_protein	GCF_000772485.1	Primary Assembly	chromosome		NZ_CP006741.1	1151873	1152223	+	WP_011068170.1	WP_011068170.1				351	116
BLGT_RS07535	BLGT_07730	chaperonin GroEL	-1566098	2.8407	24.2995	8.55405	CDS	with_protein	GCF_000772485.1	Primary Assembly	chromosome		NZ_CP006741.1	1792032	1793657	-	WP_007053188.1	WP_007053188.1		groL		1626	541
BLGT_RS00890	BLGT_00900	DnaJ domain-containing protein	1664035		9.83779	7.76954	CDS	with_protein	GCF_000772485.1	Primary Assembly	chromosome		NZ_CP006741.1	227559	228578	+	WP_007057596.1	WP_007057596.1				1020	339
BLGT_RS07955	BLGT_08145	hypothetical protein	211086		6.31362	7.66281	CDS	with_protein	GCF_000772485.1	Primary Assembly	chromosome		NZ_CP006741.1	1892613	1893593	-	WP_007052459.1	WP_007052459.1				981	326
BLGT_RS08940	BLGT_09160	co-chaperone GroES	-1878161	3.24042	24.7665	7.64298	CDS	with_protein	GCF_000772485.1	Primary Assembly	chromosome		NZ_CP006741.1	2104679	2104972	-	WP_007053011.1	WP_007053011.1				294	97
BLGT_RS00885	BLGT_00895	nucleotide exchange factor GrpE	-66788		9.58423	7.47726	CDS	with_protein	GCF_000772485.1	Primary Assembly	chromosome		NZ_CP006741.1	226811	227467	+	WP_007054671.1	WP_007054671.1		grpE		657	218
BLGT_RS00630	BLGT_00630	drug/metabolite DMT transporter permease	578553		8.60692	7.44032	CDS	with_protein	GCF_000772485.1	Primary Assembly	chromosome		NZ_CP006741.1	160679	161635	+	WP_007055929.1	WP_007055929.1		yddG		957	318
BLGT_RS02975	BLGT_03050	sugar ABC transporter substrate-binding protein	-512938		4.05631	7.03281	CDS	with_protein	GCF_000772485.1	Primary Assembly	chromosome		NZ_CP006741.1	740188	741531	+	WP_038426337.1	WP_038426337.1				1344	447
BLGT_RS00895	BLGT_00905	helix-turn-helix transcriptional regulator	-4249		8.19025	6.57263	CDS	with_protein	GCF_000772485.1	Primary Assembly	chromosome		NZ_CP006741.1	228593	229180	+	WP_007054672.1	WP_007054672.1				588	195
BLGT_RS00880	BLGT_00890	molecular chaperone DnaK	1800546		7.57804	6.56535	CDS	with_protein	GCF_000772485.1	Primary Assembly	chromosome		NZ_CP006741.1	224931	226811	+	WP_007051640.1	WP_007051640.1		dnaK		1881	626
BLGT_RS10365		hypothetical protein	-1767234		9.9679	6.50172	CDS	with_protein	GCF_000772485.1	Primary Assembly	chromosome		NZ_CP006741.1	2027357	2027704	+	WP_011068752.1	WP_011068752.1				348	115
BLGT_RS09910		signal recognition particle sRNA small type	1024197	2.41031	14.3086	5.9364	ncRNA	SRP_RNA	GCF_000772485.1	Primary Assembly	chromosome		NZ_CP006741.1	260470	260564	+				ffs		95
BLGT_RS05425		heat-inducible transcriptional repressor HrcA	-1037301		7.49531	5.85731	CDS	without_protein	GCF_000772485.1	Primary Assembly	chromosome		NZ_CP006741.1	1284761	1285880	-				hrcA		1120		pseudo
BLGT_RS00990	BLGT_01000	ATP-binding protein	488642		7.81842	5.82328	CDS	with_protein	GCF_000772485.1	Primary Assembly	chromosome		NZ_CP006741.1	248579	249862	+	WP_007054687.1	WP_007054687.1				1284	427
BLGT_RS02970	BLGT_03045	extracellular solute-binding protein	1485788		2.49665	4.98652	CDS	with_protein	GCF_000772485.1	Primary Assembly	chromosome		NZ_CP006741.1	738504	739856	+	WP_007053698.1	WP_007053698.1				1353	450
BLGT_RS09360	BLGT_09600	ATP-dependent chaperone ClpB	-59883		2.70419	4.89356	CDS	with_protein	GCF_000772485.1	Primary Assembly	chromosome		NZ_CP006741.1	2225644	2228313	-	WP_038426572.1	WP_038426572.1		clpB		2670	889
BLGT_RS09140	BLGT_09365	23S ribosomal RNA	-9232		2.8205	4.8421	rRNA		GCF_000772485.1	Primary Assembly	chromosome		NZ_CP006741.1	2168430	2171486	-						3057
BLGT_RS09125	BLGT_09350	23S ribosomal RNA	-536050		2.8205	4.8421	rRNA		GCF_000772485.1	Primary Assembly	chromosome		NZ_CP006741.1	2162254	2165310	-						3057
BLGT_RS06855	BLGT_07045	23S ribosomal RNA	-9232		2.8205	4.8421	rRNA		GCF_000772485.1	Primary Assembly	chromosome		NZ_CP006741.1	1629260	1632316	-						3057
BLGT_RS06840	BLGT_07030	23S ribosomal RNA	-1626128		2.8205	4.8421	rRNA		GCF_000772485.1	Primary Assembly	chromosome		NZ_CP006741.1	1623084	1626140	-						3057
BLGT_RS00005	BLGT_00005	23S ribosomal RNA	2221320		2.8205	4.8421	rRNA		GCF_000772485.1	Primary Assembly	chromosome		NZ_CP006741.1	12	3068	-						3057
BLGT_RS09355	BLGT_09595	glutamyl-Q tRNA(Asp) synthetase	57587		3.19956	4.74717	CDS	with_protein	GCF_000772485.1	Primary Assembly	chromosome		NZ_CP006741.1	2224388	2225527	-	WP_080746392.1	WP_080746392.1				1140	379
BLGT_RS10475		hypothetical protein	-2106936		6.96124	4.67652	CDS	without_protein	GCF_000772485.1	Primary Assembly	chromosome		NZ_CP006741.1	2283114	2283750	+						637		pseudo
BLGT_RS00705	BLGT_00700	PDZ domain-containing protein	1720777		6.39481	4.65385	CDS	with_protein	GCF_000772485.1	Primary Assembly	chromosome		NZ_CP006741.1	176814	178850	+	WP_038426240.1	WP_038426240.1				2037	678
BLGT_RS07985		AmmeMemoRadiSam system radical SAM enzyme	-1734140		4.51286	4.48013	CDS	with_protein	GCF_000772485.1	Primary Assembly	chromosome		NZ_CP006741.1	1899627	1900799	-	WP_007052453.1	WP_007052453.1		amrS		1173	390
BLGT_RS09875		hypothetical protein	266771	6.14568	27.5273	4.47912	CDS	with_protein	GCF_000772485.1	Primary Assembly	chromosome		NZ_CP006741.1	166659	166907	+	WP_080558432.1	WP_080558432.1				249	82
BLGT_RS01785	BLGT_01830	DUF2974 domain-containing protein	-272076		5.46716	4.45827	CDS	with_protein	GCF_000772485.1	Primary Assembly	chromosome		NZ_CP006741.1	433678	435180	-	WP_080746337.1	WP_080746337.1				1503	500
BLGT_RS09870		prolyl oligopeptidase family serine peptidase	1930725	4.08539	16.9174	4.14095	CDS	with_protein	GCF_000772485.1	Primary Assembly	chromosome		NZ_CP006741.1	163104	163874	+	WP_077381927.1	WP_077381927.1				771	256
BLGT_RS08885	BLGT_09105	extracellular solute-binding protein	-229526		7.48034	4.08901	CDS	with_protein	GCF_000772485.1	Primary Assembly	chromosome		NZ_CP006741.1	2094599	2095933	-	WP_007055228.1	WP_007055228.1				1335	444
BLGT_RS07845	BLGT_08035	anaerobic ribonucleoside-triphosphate reductase activating protein	-1758190		6.59416	4.08027	CDS	with_protein	GCF_000772485.1	Primary Assembly	chromosome		NZ_CP006741.1	1866407	1867135	-	WP_007052483.1	WP_007052483.1		nrdG		729	242
BLGT_RS00420	BLGT_00415	DNA starvation/stationary phase protection protein	61512		2.42016	4.05694	CDS	with_protein	GCF_000772485.1	Primary Assembly	chromosome		NZ_CP006741.1	108945	109424	-	WP_007051742.1	WP_007051742.1				480	159
BLGT_RS00670	BLGT_00670	DUF262 domain-containing protein	1852337		3.687	4.04429	CDS	with_protein	GCF_000772485.1	Primary Assembly	chromosome		NZ_CP006741.1	170936	172660	+	WP_007056848.1	WP_007056848.1				1725	574
BLGT_RS08535	BLGT_08735	Rrf2 family transcriptional regulator	-1964324		4.69203	3.98826	CDS	with_protein	GCF_000772485.1	Primary Assembly	chromosome		NZ_CP006741.1	2024997	2025419	+	WP_007052318.1	WP_007052318.1				423	140
BLGT_RS00210	BLGT_00205	DSBA oxidoreductase	1392269		6.34257	3.97891	CDS	with_protein	GCF_000772485.1	Primary Assembly	chromosome		NZ_CP006741.1	61095	62072	+	WP_007054647.1	WP_007054647.1				978	325
BLGT_RS06175	BLGT_06345	ribosome-associated translation inhibitor RaiA	-281497		2.19101	3.88917	CDS	with_protein	GCF_000772485.1	Primary Assembly	chromosome		NZ_CP006741.1	1454341	1455003	-	WP_007054480.1	WP_007054480.1		raiA		663	220
BLGT_RS04835	BLGT_04965	peroxiredoxin	-440740		4.5664	3.85914	CDS	with_protein	GCF_000772485.1	Primary Assembly	chromosome		NZ_CP006741.1	1173506	1174051	+	WP_052122978.1	WP_052122978.1				546	181
BLGT_RS02955	BLGT_03030	beta-galactosidase	792432		3.63862	3.80523	CDS	with_protein	GCF_000772485.1	Primary Assembly	chromosome		NZ_CP006741.1	733311	735386	+	WP_013410315.1	WP_013410315.1				2076	691
BLGT_RS06485	BLGT_06670	hypothetical protein	499569		3.14877	3.79494	CDS	with_protein	GCF_000772485.1	Primary Assembly	chromosome		NZ_CP006741.1	1527818	1528138	-	WP_007055264.1	WP_007055264.1				321	106
BLGT_RS08545	BLGT_08750	ribonuclease HI	-1864822		4.91258	3.75453	CDS	with_protein	GCF_000772485.1	Primary Assembly	chromosome		NZ_CP006741.1	2027707	2028693	+	WP_075662791.1	WP_075662791.1				987	328
BLGT_RS00645	BLGT_00645	DUF2156 domain-containing protein	1859110	6.32687	23.632	3.73518	CDS	with_protein	GCF_000772485.1	Primary Assembly	chromosome		NZ_CP006741.1	163871	166444	+	WP_038426239.1	WP_038426239.1				2574	857
BLGT_RS08540	BLGT_08740	FAD-dependent oxidoreductase	-746491		3.60053	3.69958	CDS	with_protein	GCF_000772485.1	Primary Assembly	chromosome		NZ_CP006741.1	2025554	2027170	+	WP_007055323.1	WP_007055323.1				1617	538
BLGT_RS05405	BLGT_05545	PAC2 family protein	996275		2.46851	3.67113	CDS	with_protein	GCF_000772485.1	Primary Assembly	chromosome		NZ_CP006741.1	1280679	1281536	+	WP_080575027.1	WP_080575027.1				858	285
BLGT_RS09540	BLGT_09795	glycoside hydrolase family 127 protein	-345426		4.98535	3.63618	CDS	with_protein	GCF_000772485.1	Primary Assembly	chromosome		NZ_CP006741.1	2277811	2280039	-	WP_038426581.1	WP_038426581.1				2229	742
BLGT_RS08140	BLGT_08330	xylose isomerase	-314187		5.58724	3.51959	CDS	with_protein	GCF_000772485.1	Primary Assembly	chromosome		NZ_CP006741.1	1934613	1935962	-	WP_007055684.1	WP_007055684.1		xylA		1350	449
BLGT_RS06830	BLGT_07020	aldo/keto reductase	-789815		4.47828	3.50915	CDS	with_protein	GCF_000772485.1	Primary Assembly	chromosome		NZ_CP006741.1	1621775	1622602	+	WP_007056517.1	WP_007056517.1				828	275
BLGT_RS03360	BLGT_03445	formate-dependent phosphoribosylglycinamide formyltransferase	715078		2.38011	3.4567	CDS	with_protein	GCF_000772485.1	Primary Assembly	chromosome		NZ_CP006741.1	832787	834130	-	WP_011068297.1	WP_011068297.1		purT		1344	447
BLGT_RS06555	BLGT_06740	glucosamine-6-phosphate deaminase	140311		3.6562	3.43715	CDS	with_protein	GCF_000772485.1	Primary Assembly	chromosome		NZ_CP006741.1	1549208	1550020	-	WP_007052563.1	WP_007052563.1		nagB		813	270
BLGT_RS07100	BLGT_07300	SPFH domain-containing protein	-1636410		2.25661	3.41368	CDS	with_protein	GCF_000772485.1	Primary Assembly	chromosome		NZ_CP006741.1	1690331	1691230	-	WP_038426478.1	WP_038426478.1				900	299
BLGT_RS00185	BLGT_00180	DUF3990 domain-containing protein	381980	2.78751	9.28559	3.33115	CDS	with_protein	GCF_000772485.1	Primary Assembly	chromosome		NZ_CP006741.1	54820	55503	-	WP_038426217.1	WP_038426217.1				684	227
BLGT_RS01815	BLGT_01860	MFS transporter	293352		4.45311	3.32552	CDS	with_protein	GCF_000772485.1	Primary Assembly	chromosome		NZ_CP006741.1	437483	438760	-	WP_011068433.1	WP_011068433.1				1278	425
BLGT_RS02950	BLGT_03025	ABC transporter permease subunit	-133965			3.32094	CDS	with_protein	GCF_000772485.1	Primary Assembly	chromosome		NZ_CP006741.1	732112	733119	+	WP_021975688.1	WP_021975688.1				1008	335
BLGT_RS02490	BLGT_02545	alpha/beta hydrolase	-437707		3.6967	3.29945	CDS	with_protein	GCF_000772485.1	Primary Assembly	chromosome		NZ_CP006741.1	599154	600011	+	WP_007051340.1	WP_007051340.1				858	285
BLGT_RS09865		hypothetical protein	1931035	3.14613	10.3517	3.29029	CDS	without_protein	GCF_000772485.1	Primary Assembly	chromosome		NZ_CP006741.1	162304	162641	-						338		pseudo
BLGT_RS08880	BLGT_09100	sugar ABC transporter permease	-291247	2.7455	8.93396	3.25404	CDS	with_protein	GCF_000772485.1	Primary Assembly	chromosome		NZ_CP006741.1	2093676	2094587	-	WP_038426550.1	WP_038426550.1				912	303
BLGT_RS07595		hypothetical protein	-1797976		4.45037	3.2463	CDS	with_protein	GCF_000772485.1	Primary Assembly	chromosome		NZ_CP006741.1	1803340	1803585	-	WP_011068850.1	WP_011068850.1				246	81
BLGT_RS00015	BLGT_00015	NAD-dependent protein deacetylase	1545268		5.18303	3.19522	CDS	with_protein	GCF_000772485.1	Primary Assembly	chromosome		NZ_CP006741.1	5609	6364	+	WP_007055686.1	WP_007055686.1				756	251
BLGT_RS06565	BLGT_06750	ROK family protein	-1334238		2.39286	3.19151	CDS	with_protein	GCF_000772485.1	Primary Assembly	chromosome		NZ_CP006741.1	1551632	1552546	-	WP_011067998.1	WP_011067998.1				915	304
BLGT_RS00855	BLGT_00860	hypothetical protein	2001687		2.13289	3.171	CDS	with_protein	GCF_000772485.1	Primary Assembly	chromosome		NZ_CP006741.1	218308	218589	-	WP_007055544.1	WP_007055544.1				282	93
BLGT_RS09335	BLGT_09575	ATP-binding protein	-752923		3.09774	3.16614	CDS	with_protein	GCF_000772485.1	Primary Assembly	chromosome		NZ_CP006741.1	2220276	2221586	-	WP_007053092.1	WP_007053092.1				1311	436
BLGT_RS06240	BLGT_06410	Bax inhibitor-1/YccA family protein	572535		2.75916	3.14805	CDS	with_protein	GCF_000772485.1	Primary Assembly	chromosome		NZ_CP006741.1	1468663	1469562	-	WP_007052631.1	WP_007052631.1				900	299
BLGT_RS08600	BLGT_08810	alpha-N-arabinofuranosidase	-1443644		3.5849	3.13548	CDS	with_protein	GCF_000772485.1	Primary Assembly	chromosome		NZ_CP006741.1	2042097	2043665	-	WP_008783615.1	WP_008783615.1				1569	522
BLGT_RS02495	BLGT_02550	NAD(+) diphosphatase	1297933		4.02461	3.11825	CDS	with_protein	GCF_000772485.1	Primary Assembly	chromosome		NZ_CP006741.1	600021	601313	+	WP_023658101.1	WP_023658101.1		nudC		1293	430
BLGT_RS07980	BLGT_08165	hypothetical protein	-1111587		2.72234	3.11456	CDS	with_protein	GCF_000772485.1	Primary Assembly	chromosome		NZ_CP006741.1	1899246	1899602	+	WP_007052454.1	WP_007052454.1				357	118
BLGT_RS03185	BLGT_03265	alpha-L-arabinofuranosidase	861867		2.65765	3.11011	CDS	with_protein	GCF_000772485.1	Primary Assembly	chromosome		NZ_CP006741.1	788015	790324	-	WP_011068312.1	WP_011068312.1				2310	769
BLGT_RS10270		hypothetical protein	-1596756		2.82575	3.10917	CDS	with_protein	GCF_000772485.1	Primary Assembly	chromosome		NZ_CP006741.1	1652191	1652454	+	WP_007054065.1	WP_007054065.1				264	87
BLGT_RS00190	BLGT_00185	voltage-gated potassium channel	995357		3.79578	3.08559	CDS	with_protein	GCF_000772485.1	Primary Assembly	chromosome		NZ_CP006741.1	55698	56465	+	WP_007054642.1	WP_007054642.1				768	255
BLGT_RS04320	BLGT_04415	hypothetical protein	488952		2.57003	3.05943	CDS	with_protein	GCF_000772485.1	Primary Assembly	chromosome		NZ_CP006741.1	1051822	1052289	-	WP_014485723.1	WP_014485723.1				468	155
BLGT_RS06525	BLGT_06710	NUDIX domain-containing protein	-1479559		2.35873	3.05322	CDS	with_protein	GCF_000772485.1	Primary Assembly	chromosome		NZ_CP006741.1	1541241	1541762	+	WP_007057255.1	WP_007057255.1				522	173
BLGT_RS00215	BLGT_00210	tRNA-Thr	104755		4.84357	3.05022	tRNA		GCF_000772485.1	Primary Assembly	chromosome		NZ_CP006741.1	62203	62276	+						74		anticodon=TGT
BLGT_RS00650		peptide-methionine (R)-S-oxide reductase MsrB	#REF!		3.71791	3.01335	CDS	without_protein	GCF_000772485.1	Primary Assembly	chromosome		NZ_CP006741.1	167031	168015	+				msrB		985		pseudo
BLGT_RS06560	BLGT_06745	ROK family transcriptional regulator	526014		2.69599	2.99837	CDS	with_protein	GCF_000772485.1	Primary Assembly	chromosome		NZ_CP006741.1	1550358	1551482	+	WP_007058505.1	WP_007058505.1				1125	374
BLGT_RS08815	BLGT_09035	glycogen debranching protein GlgX	-905882		3.87637	2.98519	CDS	with_protein	GCF_000772485.1	Primary Assembly	chromosome		NZ_CP006741.1	2077496	2080036	+	WP_038426546.1	WP_038426546.1		glgX		2541	846
BLGT_RS04840	BLGT_04970	hypothetical protein	893821		2.81099	2.9757	CDS	with_protein	GCF_000772485.1	Primary Assembly	chromosome		NZ_CP006741.1	1174154	1174978	-	WP_038426392.1	WP_038426392.1				825	274
BLGT_RS08780	BLGT_08995	ROK family transcriptional regulator	37431		3.10309	2.96746	CDS	with_protein	GCF_000772485.1	Primary Assembly	chromosome		NZ_CP006741.1	2068799	2069941	+	WP_032684273.1	WP_032684273.1				1143	380
BLGT_RS08955	BLGT_09175	5-formyltetrahydrofolate cyclo-ligase	-2010668			2.94658	CDS	with_protein	GCF_000772485.1	Primary Assembly	chromosome		NZ_CP006741.1	2107372	2108121	+	WP_038426557.1	WP_038426557.1				750	249
BLGT_RS00355	BLGT_00345	NADP-specific glutamate dehydrogenase	1994017			2.94494	CDS	with_protein	GCF_000772485.1	Primary Assembly	chromosome		NZ_CP006741.1	97453	98799	-	WP_007051757.1	WP_007051757.1				1347	448
BLGT_RS08875	BLGT_09095	carbohydrate ABC transporter permease	-433388	3.12243	9.18508	2.94165	CDS	with_protein	GCF_000772485.1	Primary Assembly	chromosome		NZ_CP006741.1	2092816	2093673	-	WP_038426636.1	WP_038426636.1				858	285
BLGT_RS10280		hypothetical protein	-929472	-2.29772		2.92516	CDS	with_protein	GCF_000772485.1	Primary Assembly	chromosome		NZ_CP006741.1	1660285	1660596	+	WP_077321859.1	WP_077321859.1				312	103
BLGT_RS02945	BLGT_03020	sugar ABC transporter permease	-312610	-2.3435		2.90963	CDS	with_protein	GCF_000772485.1	Primary Assembly	chromosome		NZ_CP006741.1	731124	732056	+	WP_011068330.1	WP_011068330.1				933	310
BLGT_RS01715	BLGT_01760	CYTH domain-containing protein	1712190		3.54346	2.90228	CDS	with_protein	GCF_000772485.1	Primary Assembly	chromosome		NZ_CP006741.1	419446	420072	-	WP_007054770.1	WP_007054770.1				627	208
BLGT_RS09040	BLGT_09265	hypothetical protein	-1926061			2.89832	CDS	with_protein	GCF_000772485.1	Primary Assembly	chromosome		NZ_CP006741.1	2132262	2132780	-	WP_007058367.1	WP_007058367.1				519	172
BLGT_RS00820	BLGT_00825	LacI family transcriptional regulator	225094		3.15277	2.88577	CDS	with_protein	GCF_000772485.1	Primary Assembly	chromosome		NZ_CP006741.1	206719	207762	+	WP_038426247.1	WP_038426247.1				1044	347
BLGT_RS01780	BLGT_01825	TetR/AcrR family transcriptional regulator	1774718		3.44495	2.87523	CDS	with_protein	GCF_000772485.1	Primary Assembly	chromosome		NZ_CP006741.1	432856	433587	-	WP_007051459.1	WP_007051459.1				732	243
BLGT_RS10420		CPBP family intramembrane metalloprotease	-1286286		3.28246	2.8578	CDS	with_protein	GCF_000772485.1	Primary Assembly	chromosome		NZ_CP006741.1	2208305	2209990	-	WP_080746390.1	WP_080746390.1				1686	561
BLGT_RS03760	BLGT_03845	phosphopyruvate hydratase	1348704	2.09495	5.92731	2.82933	CDS	with_protein	GCF_000772485.1	Primary Assembly	chromosome		NZ_CP006741.1	923704	925002	+	WP_007051126.1	WP_007051126.1				1299	432
BLGT_RS09525	BLGT_09780	glycoside hydrolase family 27 protein	-1531987		4.95502	2.79333	CDS	with_protein	GCF_000772485.1	Primary Assembly	chromosome		NZ_CP006741.1	2273706	2275115	-	WP_012472105.1	WP_012472105.1				1410	469
BLGT_RS02985	BLGT_03060	type III pantothenate kinase	476473	2.46411	6.78482	2.75345	CDS	with_protein	GCF_000772485.1	Primary Assembly	chromosome		NZ_CP006741.1	743128	743898	-	WP_007051273.1	WP_007051273.1				771	256
BLGT_RS10615	BLGT_05185	hypothetical protein	-527623			2.75149	CDS	with_protein	GCF_000772485.1	Primary Assembly	chromosome		NZ_CP006741.1	1220371	1220541	+	WP_115800108.1	WP_115800108.1				171	56
BLGT_RS02820	BLGT_02885	serine/threonine protein kinase	845258			2.73397	CDS	with_protein	GCF_000772485.1	Primary Assembly	chromosome		NZ_CP006741.1	692918	694339	-	WP_007057781.1	WP_007057781.1				1422	473
BLGT_RS06520	BLGT_06705	aminopeptidase P family protein	-1368474		2.72731	2.71552	CDS	with_protein	GCF_000772485.1	Primary Assembly	chromosome		NZ_CP006741.1	1539597	1541192	+	WP_032682524.1	WP_032682524.1				1596	531
BLGT_RS00675	BLGT_00675	putative heavy metal-binding protein	1110510		3.81366	2.70326	CDS	with_protein	GCF_000772485.1	Primary Assembly	chromosome		NZ_CP006741.1	172718	173050	+	WP_007051681.1	WP_007051681.1				333	110
BLGT_RS05420	BLGT_05560	molecular chaperone DnaJ	518905		4.10558	2.70158	CDS	with_protein	GCF_000772485.1	Primary Assembly	chromosome		NZ_CP006741.1	1283560	1284705	-	WP_010080662.1	WP_010080662.1		dnaJ		1146	381
BLGT_RS07600	BLGT_07795	hypothetical protein	510723	2.57304	6.92134	2.68994	CDS	with_protein	GCF_000772485.1	Primary Assembly	chromosome		NZ_CP006741.1	1803610	1803975	+	WP_007053174.1	WP_007053174.1				366	121
BLGT_RS09645	BLGT_09895	TetR/AcrR family transcriptional regulator	-447979	2.01779	5.41526	2.68375	CDS	with_protein	GCF_000772485.1	Primary Assembly	chromosome		NZ_CP006741.1	2314698	2315267	+	WP_038426588.1	WP_038426588.1				570	189
BLGT_RS07850	BLGT_08040	anaerobic ribonucleoside-triphosphate reductase	-1279471		4.60415	2.68225	CDS	with_protein	GCF_000772485.1	Primary Assembly	chromosome		NZ_CP006741.1	1867288	1869696	-	WP_007052482.1	WP_007052482.1		nrdD		2409	802
BLGT_RS02435	BLGT_02495	hypothetical protein	1740085		3.24313	2.67778	CDS	with_protein	GCF_000772485.1	Primary Assembly	chromosome		NZ_CP006741.1	590225	590587	-	WP_007055288.1	WP_007055288.1				363	120
BLGT_RS09710		NADPH-dependent oxidoreductase	-1162534		2.10598	2.66775	CDS	without_protein	GCF_000772485.1	Primary Assembly	chromosome		NZ_CP006741.1	2330672	2331439	+						768		pseudo
BLGT_RS04815	BLGT_04945	glycogen synthase	808965		3.55347	2.65491	CDS	with_protein	GCF_000772485.1	Primary Assembly	chromosome		NZ_CP006741.1	1168905	1170155	+	WP_015713555.1	WP_015713555.1		glgA		1251	416
BLGT_RS08360	BLGT_08555	universal stress protein	-360274			2.63661	CDS	with_protein	GCF_000772485.1	Primary Assembly	chromosome		NZ_CP006741.1	1979120	1980157	-	WP_007052357.1	WP_007052357.1				1038	345
BLGT_RS06820		acylphosphatase	-1078168			2.62166	CDS	with_protein	GCF_000772485.1	Primary Assembly	chromosome		NZ_CP006741.1	1619883	1620176	-	WP_038426472.1	WP_038426472.1				294	97
BLGT_RS02255	BLGT_02310	L-ribulose-5-phosphate 4-epimerase	-486042		2.45583	2.61132	CDS	with_protein	GCF_000772485.1	Primary Assembly	chromosome		NZ_CP006741.1	542008	542700	+	WP_038426299.1	WP_038426299.1				693	230
BLGT_RS00195	BLGT_00190	ATP-binding protein	2152544		3.31151	2.60655	CDS	with_protein	GCF_000772485.1	Primary Assembly	chromosome		NZ_CP006741.1	56658	57764	+	WP_012472077.1	WP_012472077.1				1107	368
BLGT_RS09300	BLGT_09540	3-isopropylmalate dehydratase small subunit	-512961		2.81077	2.58721	CDS	with_protein	GCF_000772485.1	Primary Assembly	chromosome		NZ_CP006741.1	2210308	2211000	-	WP_007053083.1	WP_007053083.1		leuD		693	230
BLGT_RS07155	BLGT_07355	alpha/beta fold hydrolase	-765629			2.57716	CDS	with_protein	GCF_000772485.1	Primary Assembly	chromosome		NZ_CP006741.1	1698039	1698689	+	WP_038426481.1	WP_038426481.1				651	216
BLGT_RS03815	BLGT_03900	PAS domain-containing sensor histidine kinase	-761480		3.54819	2.57699	CDS	with_protein	GCF_000772485.1	Primary Assembly	chromosome		NZ_CP006741.1	933060	934592	+	WP_080713834.1	WP_080713834.1				1533	510
BLGT_RS00680	BLGT_00680	hemolysin III family protein	144380		4.8762	2.57517	CDS	with_protein	GCF_000772485.1	Primary Assembly	chromosome		NZ_CP006741.1	173112	173969	-	WP_032685264.1	WP_032685264.1				858	285
BLGT_RS01260	BLGT_01280	P-II family nitrogen regulator	1023192	2.2367	5.75321	2.57219	CDS	with_protein	GCF_000772485.1	Primary Assembly	chromosome		NZ_CP006741.1	318349	318687	+	WP_007051565.1	WP_007051565.1				339	112
BLGT_RS05670	BLGT_05815	helix-turn-helix transcriptional regulator	210685			2.54786	CDS	with_protein	GCF_000772485.1	Primary Assembly	chromosome		NZ_CP006741.1	1341879	1342088	+	WP_032684878.1	WP_032684878.1				210	69
BLGT_RS06570	BLGT_06755	ROK family transcriptional regulator	657096			2.54573	CDS	with_protein	GCF_000772485.1	Primary Assembly	chromosome		NZ_CP006741.1	1552773	1553987	+	WP_007058506.1	WP_007058506.1				1215	404
BLGT_RS09305	BLGT_09545	3-isopropylmalate dehydratase large subunit	-311700		2.1069	2.54199	CDS	with_protein	GCF_000772485.1	Primary Assembly	chromosome		NZ_CP006741.1	2211083	2212486	-	WP_007053084.1	WP_007053084.1		leuC		1404	467
BLGT_RS07990		AmmeMemoRadiSam system protein B	-1422836		2.22388	2.53005	CDS	with_protein	GCF_000772485.1	Primary Assembly	chromosome		NZ_CP006741.1	1900786	1902576	-	WP_038426521.1	WP_038426521.1		amrB		1791	596
BLGT_RS01990	BLGT_02040	Arc family DNA-binding protein	1512830		3.33677	2.5241	CDS	with_protein	GCF_000772485.1	Primary Assembly	chromosome		NZ_CP006741.1	479740	480018	-	WP_007054812.1	WP_007054812.1				279	92
BLGT_RS08425	BLGT_08620	DUF4037 domain-containing protein	-376695		3.3257	2.51273	CDS	with_protein	GCF_000772485.1	Primary Assembly	chromosome		NZ_CP006741.1	1992848	1995079	+	WP_038426536.1	WP_038426536.1				2232	743
BLGT_RS06815	BLGT_07010	histidinol dehydrogenase	-1500249			2.50753	CDS	with_protein	GCF_000772485.1	Primary Assembly	chromosome		NZ_CP006741.1	1618384	1619766	-	WP_144314115.1	WP_144314115.1		hisD		1383	460
BLGT_RS09850		hypothetical protein	451069		3.16013	2.50582	CDS	with_protein	GCF_000772485.1	Primary Assembly	chromosome		NZ_CP006741.1	119517	119990	-	WP_077321584.1	WP_077321584.1				474	157
BLGT_RS02355	BLGT_02405	ATP-binding protein	1044798		2.5483	2.49902	CDS	with_protein	GCF_000772485.1	Primary Assembly	chromosome		NZ_CP006741.1	571059	572429	-	WP_038426303.1	WP_038426303.1				1371	456
BLGT_RS06810	BLGT_07005	histidinol-phosphate transaminase	-888490			2.49892	CDS	with_protein	GCF_000772485.1	Primary Assembly	chromosome		NZ_CP006741.1	1617227	1618387	-	WP_038426470.1	WP_038426470.1				1161	386
BLGT_RS02940	BLGT_03015	LacI family DNA-binding transcriptional regulator	-635438			2.48949	CDS	with_protein	GCF_000772485.1	Primary Assembly	chromosome		NZ_CP006741.1	729897	730907	-	WP_021975689.1	WP_021975689.1				1011	336
BLGT_RS00350	BLGT_00340	pectinesterase	1596215		2.78809	2.48573	CDS	with_protein	GCF_000772485.1	Primary Assembly	chromosome		NZ_CP006741.1	95469	97055	+	WP_038426225.1	WP_038426225.1				1587	528
BLGT_RS07130	BLGT_07330	cystathionine beta-lyase	-1255552		2.67082	2.48116	CDS	with_protein	GCF_000772485.1	Primary Assembly	chromosome		NZ_CP006741.1	1693270	1694502	-	WP_013410420.1	WP_013410420.1				1233	410
BLGT_RS01820	BLGT_01865	sugar kinase	39345	2.19042	5.4204	2.4746	CDS	with_protein	GCF_000772485.1	Primary Assembly	chromosome		NZ_CP006741.1	438950	439966	-	WP_032682585.1	WP_032682585.1				1017	338
BLGT_RS01985	BLGT_02035	type II toxin-antitoxin system VapC family toxin	-96989		3.15162	2.46899	CDS	with_protein	GCF_000772485.1	Primary Assembly	chromosome		NZ_CP006741.1	479311	479730	-	WP_038426284.1	WP_038426284.1				420	139
BLGT_RS01505	BLGT_01530	alpha-1,4-glucan--maltose-1-phosphate maltosyltransferase	1691227		3.3868	2.46318	CDS	with_protein	GCF_000772485.1	Primary Assembly	chromosome		NZ_CP006741.1	382741	384981	-	WP_038426266.1	WP_038426266.1				2241	746
BLGT_RS08810	BLGT_09030	zinc-dependent alcohol dehydrogenase family protein	229322			2.46168	CDS	with_protein	GCF_000772485.1	Primary Assembly	chromosome		NZ_CP006741.1	2076208	2077212	-	WP_012472149.1	WP_012472149.1				1005	334
BLGT_RS09625	BLGT_09875	ATPase AAA	-753971		2.40039	2.46057	CDS	with_protein	GCF_000772485.1	Primary Assembly	chromosome		NZ_CP006741.1	2306534	2308030	-	WP_007052945.1	WP_007052945.1				1497	498
BLGT_RS06575	BLGT_06760	carbohydrate kinase	-413526		3.56597	2.45344	CDS	with_protein	GCF_000772485.1	Primary Assembly	chromosome		NZ_CP006741.1	1554059	1554955	+	WP_007057385.1	WP_007057385.1				897	298
BLGT_RS04720	BLGT_04830	MazG family protein	953754			2.43198	CDS	with_protein	GCF_000772485.1	Primary Assembly	chromosome		NZ_CP006741.1	1141429	1142361	+	WP_080746354.1	WP_080746354.1				933	310
BLGT_RS08890	BLGT_09110	LacI family transcriptional regulator	-1498744		3.81168	2.42362	CDS	with_protein	GCF_000772485.1	Primary Assembly	chromosome		NZ_CP006741.1	2096115	2097140	+	WP_038426551.1	WP_038426551.1				1026	341
BLGT_RS02485	BLGT_02540	DUF4916 domain-containing protein	742315		2.77677	2.40251	CDS	with_protein	GCF_000772485.1	Primary Assembly	chromosome		NZ_CP006741.1	598396	599028	+	WP_038426309.1	WP_038426309.1				633	210
BLGT_RS10180		hypothetical protein	-87349		2.30742	2.38328	CDS	with_protein	GCF_000772485.1	Primary Assembly	chromosome		NZ_CP006741.1	1341343	1341579	-	WP_022527634.1	WP_022527634.1				237	78
BLGT_RS05260	BLGT_05405	hypothetical protein	836267		4.21015	2.3751	CDS	with_protein	GCF_000772485.1	Primary Assembly	chromosome		NZ_CP006741.1	1254230	1254637	+	WP_008783532.1	WP_008783532.1				408	135
BLGT_RS08870	BLGT_09090	alpha-glucosidase	-1711523	3.09862	7.35577	2.37389	CDS	with_protein	GCF_000772485.1	Primary Assembly	chromosome		NZ_CP006741.1	2090904	2092724	-	WP_038426549.1	WP_038426549.1				1821	606
BLGT_RS01495	BLGT_01520	manganese efflux pump	1137030			2.36695	CDS	with_protein	GCF_000772485.1	Primary Assembly	chromosome		NZ_CP006741.1	381201	381785	-	WP_007051517.1	WP_007051517.1				585	194
BLGT_RS06450	BLGT_06620	Cys-tRNA(Pro) deacylase	-1099154		2.4811	2.35313	CDS	with_protein	GCF_000772485.1	Primary Assembly	chromosome		NZ_CP006741.1	1518815	1519324	+	WP_038426461.1	WP_038426461.1		ybaK		510	169
BLGT_RS01720	BLGT_01765	tRNA-Arg	1714433			2.35163	tRNA		GCF_000772485.1	Primary Assembly	chromosome		NZ_CP006741.1	420170	420245	+						76		anticodon=CCG
BLGT_RS09050	BLGT_09275	VWA domain-containing protein	-1942007	-2.4419		2.33437	CDS	with_protein	GCF_000772485.1	Primary Assembly	chromosome		NZ_CP006741.1	2134678	2137062	-	WP_038426561.1	WP_038426561.1				2385	794
BLGT_RS00770	BLGT_00775	alpha-L-arabinofuranosidase	234703		2.84801	2.3336	CDS	with_protein	GCF_000772485.1	Primary Assembly	chromosome		NZ_CP006741.1	195055	196602	+	WP_007051661.1	WP_007051661.1				1548	515
BLGT_RS01775	BLGT_01820	aspartate ammonia-lyase	-79152			2.33287	CDS	with_protein	GCF_000772485.1	Primary Assembly	chromosome		NZ_CP006741.1	431305	432777	-	WP_007054776.1	WP_007054776.1				1473	490
BLGT_RS01395	BLGT_01415	HAD-IC family P-type ATPase	1329145			2.3315	CDS	with_protein	GCF_000772485.1	Primary Assembly	chromosome		NZ_CP006741.1	353625	356291	-	WP_038426262.1	WP_038426262.1				2667	888
BLGT_RS07070	BLGT_07270	DUF3107 domain-containing protein	-461700		2.00559	2.32812	CDS	with_protein	GCF_000772485.1	Primary Assembly	chromosome		NZ_CP006741.1	1685436	1685660	+	WP_007054042.1	WP_007054042.1				225	74
BLGT_RS05080	BLGT_05220	ATP-binding cassette domain-containing protein	-42776		2.30202	2.31623	CDS	with_protein	GCF_000772485.1	Primary Assembly	chromosome		NZ_CP006741.1	1223960	1224862	+	WP_077382961.1	WP_077382961.1				903	300
BLGT_RS10610	BLGT_05005	EamA family transporter	-963182			2.30755	CDS	with_protein	GCF_000772485.1	Primary Assembly	chromosome		NZ_CP006741.1	1182086	1182484	-	WP_010080619.1	WP_010080619.1				399	132
BLGT_RS00865	BLGT_00870	LacI family transcriptional regulator	743027		4.52482	2.30634	CDS	with_protein	GCF_000772485.1	Primary Assembly	chromosome		NZ_CP006741.1	219302	220312	-	WP_007051644.1	WP_007051644.1				1011	336
BLGT_RS03945	BLGT_04025	NUDIX hydrolase	-613466		3.93817	2.30173	CDS	with_protein	GCF_000772485.1	Primary Assembly	chromosome		NZ_CP006741.1	963339	964100	-	WP_011068238.1	WP_011068238.1				762	253
BLGT_RS01380	BLGT_01400	HPr family phosphocarrier protein	250445		2.00379	2.29321	CDS	with_protein	GCF_000772485.1	Primary Assembly	chromosome		NZ_CP006741.1	350634	350894	+	WP_007051543.1	WP_007051543.1				261	86
BLGT_RS02500	BLGT_02555	glycine cleavage system protein GcvH	998214		2.57175	2.28448	CDS	with_protein	GCF_000772485.1	Primary Assembly	chromosome		NZ_CP006741.1	601339	601752	+	WP_007051338.1	WP_007051338.1		gcvH		414	137
BLGT_RS06740	BLGT_06935	transcriptional repressor LexA	-1484445			2.27242	CDS	with_protein	GCF_000772485.1	Primary Assembly	chromosome		NZ_CP006741.1	1599966	1600691	+	WP_007052535.1	WP_007052535.1		lexA		726	241
BLGT_RS09840	BLGT_00445	hypothetical protein	639519		2.00232	2.27148	CDS	with_protein	GCF_000772485.1	Primary Assembly	chromosome		NZ_CP006741.1	116246	116548	-	WP_011068583.1	WP_011068583.1				303	100
BLGT_RS03035	BLGT_03110	S-ribosylhomocysteine lyase	1162379		2.12153	2.27026	CDS	with_protein	GCF_000772485.1	Primary Assembly	chromosome		NZ_CP006741.1	756067	756561	+	WP_021975167.1	WP_021975167.1				495	164
BLGT_RS08075	BLGT_08260	xylulokinase	-68617			2.2583	CDS	with_protein	GCF_000772485.1	Primary Assembly	chromosome		NZ_CP006741.1	1918940	1920460	+	WP_008782901.1	WP_008782901.1				1521	506
BLGT_RS07800	BLGT_07995	glycoside hydrolase family 3 protein	64125			2.25166	CDS	with_protein	GCF_000772485.1	Primary Assembly	chromosome		NZ_CP006741.1	1851843	1853366	-	WP_013582884.1	WP_013582884.1				1524	507
BLGT_RS08070	BLGT_08255	ROK family transcriptional regulator	-501868			2.24442	CDS	with_protein	GCF_000772485.1	Primary Assembly	chromosome		NZ_CP006741.1	1917491	1918720	-	WP_007052436.1	WP_007052436.1				1230	409
BLGT_RS06035	BLGT_06195	pyridoxamine 5'-phosphate oxidase family protein	-880370			2.23488	CDS	with_protein	GCF_000772485.1	Primary Assembly	chromosome		NZ_CP006741.1	1416852	1417451	-	WP_011068054.1	WP_011068054.1				600	199
BLGT_RS02235	BLGT_02290	signal peptidase I	1787146		4.29987	2.234	CDS	with_protein	GCF_000772485.1	Primary Assembly	chromosome		NZ_CP006741.1	537081	537920	+	WP_007051393.1	WP_007051393.1		lepB		840	279
BLGT_RS09685	BLGT_09935	sugar ABC transporter permease	-401284			2.2285	CDS	with_protein	GCF_000772485.1	Primary Assembly	chromosome		NZ_CP006741.1	2325066	2326022	-	WP_080575018.1	WP_080575018.1				957	318
BLGT_RS08105	BLGT_08295	glycoside hydrolase family 43 protein	-81383		2.13269	2.20785	CDS	with_protein	GCF_000772485.1	Primary Assembly	chromosome		NZ_CP006741.1	1924738	1926510	-	WP_052122983.1	WP_052122983.1				1773	590
BLGT_RS07780	BLGT_07975	LacI family DNA-binding transcriptional regulator	-428154			2.19781	CDS	with_protein	GCF_000772485.1	Primary Assembly	chromosome		NZ_CP006741.1	1845127	1847007	+	WP_038426512.1	WP_038426512.1				1881	626
BLGT_RS06045	BLGT_06210	hypothetical protein	-137098		3.54333	2.18944	CDS	with_protein	GCF_000772485.1	Primary Assembly	chromosome		NZ_CP006741.1	1418853	1419821	+	WP_008783276.1	WP_008783276.1				969	322
BLGT_RS05415	BLGT_05555	phosphotransferase	-1176117		3.0489	2.18755	CDS	with_protein	GCF_000772485.1	Primary Assembly	chromosome		NZ_CP006741.1	1282723	1283514	+	WP_007054285.1	WP_007054285.1				792	263
BLGT_RS00415	BLGT_00410	ATP-binding protein	964774			2.18417	CDS	with_protein	GCF_000772485.1	Primary Assembly	chromosome		NZ_CP006741.1	107397	108710	-	WP_007051743.1	WP_007051743.1				1314	437
BLGT_RS04420	BLGT_04520	alpha-amylase	920274		2.49369	2.18338	CDS	with_protein	GCF_000772485.1	Primary Assembly	chromosome		NZ_CP006741.1	1073484	1074881	-	WP_080746418.1	WP_080746418.1				1398	465
BLGT_RS08430	BLGT_08625	DUF4125 family protein	-825482		2.95861	2.17971	CDS	with_protein	GCF_000772485.1	Primary Assembly	chromosome		NZ_CP006741.1	1995155	1995787	+	WP_038426537.1	WP_038426537.1				633	210
BLGT_RS04820	BLGT_04950	ATP-binding cassette domain-containing protein	84747		3.37667	2.1789	CDS	with_protein	GCF_000772485.1	Primary Assembly	chromosome		NZ_CP006741.1	1170305	1171153	+	WP_038426389.1	WP_038426389.1				849	282
BLGT_RS05275	BLGT_05420	RNA polymerase-binding protein RbpA	360295			2.17865	CDS	with_protein	GCF_000772485.1	Primary Assembly	chromosome		NZ_CP006741.1	1255900	1256247	-	WP_007052872.1	WP_007052872.1				348	115
BLGT_RS06805	BLGT_07000	imidazoleglycerol-phosphate dehydratase HisB	216384		2.1605	2.17007	CDS	with_protein	GCF_000772485.1	Primary Assembly	chromosome		NZ_CP006741.1	1616542	1617141	-	WP_007052519.1	WP_007052519.1		hisB		600	199
BLGT_RS07720	BLGT_07915	LacI family DNA-binding transcriptional regulator	-175891		2.0352	2.16774	CDS	with_protein	GCF_000772485.1	Primary Assembly	chromosome		NZ_CP006741.1	1833525	1834532	-	WP_011068829.1	WP_011068829.1				1008	335
BLGT_RS06965	BLGT_07155	MFS transporter	-1150338	-2.49213		2.15312	CDS	with_protein	GCF_000772485.1	Primary Assembly	chromosome		NZ_CP006741.1	1658641	1660020	+	WP_007058690.1	WP_007058690.1				1380	459
BLGT_RS02140	BLGT_02185	DNA-binding protein	1037891		2.77766	2.15308	CDS	with_protein	GCF_000772485.1	Primary Assembly	chromosome		NZ_CP006741.1	509682	509978	+	WP_101025564.1	WP_101025564.1				297	98
BLGT_RS06550	BLGT_06735	N-acetylglucosamine-6-phosphate deacetylase	244743			2.13698	CDS	with_protein	GCF_000772485.1	Primary Assembly	chromosome		NZ_CP006741.1	1547869	1549152	-	WP_007057958.1	WP_007057958.1				1284	427
BLGT_RS07540	BLGT_07735	cold-shock protein	-1251202			2.13082	CDS	with_protein	GCF_000772485.1	Primary Assembly	chromosome		NZ_CP006741.1	1793895	1794134	-	WP_007053186.1	WP_007053186.1				240	79
BLGT_RS02260	BLGT_02315	L-arabinose isomerase	977051		2.285	2.11538	CDS	with_protein	GCF_000772485.1	Primary Assembly	chromosome		NZ_CP006741.1	542932	544449	+	WP_038426300.1	WP_038426300.1		araA		1518	505
BLGT_RS06460		IS30 family transposase	489810			2.11392	CDS	without_protein	GCF_000772485.1	Primary Assembly	chromosome		NZ_CP006741.1	1521500	1522518	+						1019		pseudo
BLGT_RS10355		hypothetical protein	-43569		2.92413	2.107	CDS	without_protein	GCF_000772485.1	Primary Assembly	chromosome		NZ_CP006741.1	2012328	2012721	+						394		pseudo
BLGT_RS08295	BLGT_08490	methyltransferase domain-containing protein	-354708			2.10697	CDS	with_protein	GCF_000772485.1	Primary Assembly	chromosome		NZ_CP006741.1	1969152	1970456	+	WP_007055349.1	WP_007055349.1				1305	434
BLGT_RS06800	BLGT_06995	hypothetical protein	-1580240			2.0983	CDS	with_protein	GCF_000772485.1	Primary Assembly	chromosome		NZ_CP006741.1	1615748	1616542	-	WP_038426469.1	WP_038426469.1				795	264
BLGT_RS00135	BLGT_00130	SpaH/EbpB family LPXTG-anchored major pilin	698714		2.12561	2.09523	CDS	with_protein	GCF_000772485.1	Primary Assembly	chromosome		NZ_CP006741.1	36302	37930	-	WP_007054631.1	WP_007054631.1				1629	542
BLGT_RS02965	BLGT_03040	alpha-L-arabinofuranosidase	483907			2.09361	CDS	with_protein	GCF_000772485.1	Primary Assembly	chromosome		NZ_CP006741.1	736644	738344	-	WP_038426336.1	WP_038426336.1				1701	566
BLGT_RS05065	BLGT_05205	hypothetical protein	1000658			2.08289	CDS	with_protein	GCF_000772485.1	Primary Assembly	chromosome		NZ_CP006741.1	1222251	1222595	-	WP_007052254.1	WP_007052254.1				345	114
BLGT_RS09350	BLGT_09590	hypothetical protein	-987557		2.09623	2.07935	CDS	with_protein	GCF_000772485.1	Primary Assembly	chromosome		NZ_CP006741.1	2223253	2224362	-	WP_007054177.1	WP_007054177.1				1110	369
BLGT_RS05150		GNAT family N-acetyltransferase	-1018742		2.01639	2.07624	CDS	without_protein	GCF_000772485.1	Primary Assembly	chromosome		NZ_CP006741.1	1236805	1237376	+						572		pseudo
BLGT_RS00860	BLGT_00865	hypothetical protein	1066965		3.24035	2.07573	CDS	with_protein	GCF_000772485.1	Primary Assembly	chromosome		NZ_CP006741.1	218634	219290	+	WP_038426249.1	WP_038426249.1				657	218
BLGT_RS05430	BLGT_05570	transketolase	-353698		3.01612	2.07489	CDS	with_protein	GCF_000772485.1	Primary Assembly	chromosome		NZ_CP006741.1	1286255	1288363	+	WP_007052792.1	WP_007052792.1				2109	702
BLGT_RS03820	BLGT_03905	WhiB family transcriptional regulator	-663530			2.0669	CDS	with_protein	GCF_000772485.1	Primary Assembly	chromosome		NZ_CP006741.1	934665	934943	-	WP_003835265.1	WP_003835265.1				279	92
BLGT_RS01075	BLGT_01090	macrophage migration inhibitory factor	146592		2.48131	2.06375	CDS	with_protein	GCF_000772485.1	Primary Assembly	chromosome		NZ_CP006741.1	271413	271760	-	WP_007055531.1	WP_007055531.1				348	115
BLGT_RS01710	BLGT_01755	tetratricopeptide repeat protein	-281754			2.0624	CDS	with_protein	GCF_000772485.1	Primary Assembly	chromosome		NZ_CP006741.1	418352	419362	+	WP_011068441.1	WP_011068441.1				1011	336
BLGT_RS00520	BLGT_00520	hypothetical protein	897793		3.54543	2.06103	CDS	with_protein	GCF_000772485.1	Primary Assembly	chromosome		NZ_CP006741.1	137608	137868	-	WP_007051720.1	WP_007051720.1				261	86
BLGT_RS04265	BLGT_04360	pyridoxamine kinase	185332		2.9043	2.05815	CDS	with_protein	GCF_000772485.1	Primary Assembly	chromosome		NZ_CP006741.1	1035661	1036533	-	WP_038426364.1	WP_038426364.1				873	290
BLGT_RS05060	BLGT_05200	hypothetical protein	659942			2.05765	CDS	with_protein	GCF_000772485.1	Primary Assembly	chromosome		NZ_CP006741.1	1221865	1222071	+	WP_007052253.1	WP_007052253.1				207	68
BLGT_RS07920	BLGT_08110	GNAT family N-acetyltransferase	-870298			2.05332	CDS	with_protein	GCF_000772485.1	Primary Assembly	chromosome		NZ_CP006741.1	1882013	1882612	+	WP_011068812.1	WP_011068812.1				600	199
BLGT_RS04160	BLGT_04255	hypothetical protein	966065			2.0511	CDS	with_protein	GCF_000772485.1	Primary Assembly	chromosome		NZ_CP006741.1	1012314	1012583	+	WP_007052050.1	WP_007052050.1				270	89
BLGT_RS08355	BLGT_08550	OsmC family protein	-423355			2.04352	CDS	with_protein	GCF_000772485.1	Primary Assembly	chromosome		NZ_CP006741.1	1978648	1979061	+	WP_007052358.1	WP_007052358.1				414	137
BLGT_RS06585	BLGT_06775	hypothetical protein	204897			2.03404	CDS	with_protein	GCF_000772485.1	Primary Assembly	chromosome		NZ_CP006741.1	1555706	1556008	+	WP_007054417.1	WP_007054417.1				303	100
BLGT_RS07405	BLGT_07600	polyphosphate kinase	437679			2.03363	CDS	with_protein	GCF_000772485.1	Primary Assembly	chromosome		NZ_CP006741.1	1760905	1761978	-	WP_007055606.1	WP_007055606.1				1074	357
BLGT_RS09255	BLGT_09490	TetR/AcrR family transcriptional regulator	6816			2.02845	CDS	with_protein	GCF_000772485.1	Primary Assembly	chromosome		NZ_CP006741.1	2199657	2200322	+	WP_007056290.1	WP_007056290.1				666	221
BLGT_RS09285	BLGT_09520	diguanylate cyclase	-802841		2.26153	2.02731	CDS	with_protein	GCF_000772485.1	Primary Assembly	chromosome		NZ_CP006741.1	2207138	2208265	-	WP_038426569.1	WP_038426569.1				1128	375
BLGT_RS05990	BLGT_06150	amidohydrolase family protein	701845			2.01844	CDS	with_protein	GCF_000772485.1	Primary Assembly	chromosome		NZ_CP006741.1	1405424	1406770	-	WP_014485584.1	WP_014485584.1				1347	448
BLGT_RS08965	BLGT_09185	flagellar biosynthesis protein FlgA	-1287571		2.06588	2.01684	CDS	with_protein	GCF_000772485.1	Primary Assembly	chromosome		NZ_CP006741.1	2108615	2109277	+	WP_074709624.1	WP_074709624.1				663	220
BLGT_RS03325	BLGT_03405	LysR family transcriptional regulator	812822			2.01655	CDS	with_protein	GCF_000772485.1	Primary Assembly	chromosome		NZ_CP006741.1	821706	822671	-	WP_007051218.1	WP_007051218.1				966	321
BLGT_RS06870	BLGT_07060	oleate hydratase	314918			2.01051	CDS	with_protein	GCF_000772485.1	Primary Assembly	chromosome		NZ_CP006741.1	1635493	1637370	-	WP_007053331.1	WP_007053331.1				1878	625
BLGT_RS08230	BLGT_08420	2-amino-4-hydroxy-6-hydroxymethyldihydropteridine diphosphokinase	-1312917			2.00797	CDS	with_protein	GCF_000772485.1	Primary Assembly	chromosome		NZ_CP006741.1	1952288	1953700	-	WP_038426530.1	WP_038426530.1		folK		1413	470
BLGT_RS02655	BLGT_02720	glycosyltransferase family 2 protein	251874			-2.00351	CDS	with_protein	GCF_000772485.1	Primary Assembly	chromosome		NZ_CP006741.1	640783	641712	+	WP_038426317.1	WP_038426317.1				930	309
BLGT_RS03640	BLGT_03730	TlyA family rRNA (cytidine-2'-O)-methyltransferase	339811		-3.43464	-2.00706	CDS	with_protein	GCF_000772485.1	Primary Assembly	chromosome		NZ_CP006741.1	893586	894428	+	WP_011068270.1	WP_011068270.1				843	280
BLGT_RS05135	BLGT_05280	ATP-binding cassette domain-containing protein	84820		-2.23801	-2.01537	CDS	with_protein	GCF_000772485.1	Primary Assembly	chromosome		NZ_CP006741.1	1234239	1234937	+	WP_038426408.1	WP_038426408.1				699	232
BLGT_RS05555	BLGT_05695	SDR family NAD(P)-dependent oxidoreductase	-261288			-2.01663	CDS	with_protein	GCF_000772485.1	Primary Assembly	chromosome		NZ_CP006741.1	1319757	1320464	-	WP_007054307.1	WP_007054307.1				708	235
BLGT_RS04360	BLGT_04455	MFS transporter	-221647		-2.18069	-2.01709	CDS	with_protein	GCF_000772485.1	Primary Assembly	chromosome		NZ_CP006741.1	1059176	1060666	+	WP_021975354.1	WP_021975354.1				1491	496
BLGT_RS03385	BLGT_03470	30S ribosomal protein S12	-42898	3.00054		-2.021	CDS	with_protein	GCF_000772485.1	Primary Assembly	chromosome		NZ_CP006741.1	839019	839390	+	WP_003813881.1	WP_003813881.1				372	123
BLGT_RS03220	BLGT_03300	1-deoxy-D-xylulose-5-phosphate synthase	-588727			-2.02109	CDS	with_protein	GCF_000772485.1	Primary Assembly	chromosome		NZ_CP006741.1	796492	798681	-	WP_007051241.1	WP_007051241.1				2190	729
BLGT_RS00830	BLGT_00835	ketol-acid reductoisomerase	327034			-2.02546	CDS	with_protein	GCF_000772485.1	Primary Assembly	chromosome		NZ_CP006741.1	209954	211006	+	WP_007054663.1	WP_007054663.1		ilvC		1053	350
BLGT_RS02240	BLGT_02295	ribonuclease HII	1044830		-2.0541	-2.02568	CDS	with_protein	GCF_000772485.1	Primary Assembly	chromosome		NZ_CP006741.1	538040	538879	+	WP_022527334.1	WP_022527334.1				840	279
BLGT_RS06670	BLGT_06865	UDP-N-acetylglucosamine--N-acetylmuramyl-(pentapeptide) pyrophosphoryl-undecaprenol N-acetylglucosamine transferase	112261			-2.02642	CDS	with_protein	GCF_000772485.1	Primary Assembly	chromosome		NZ_CP006741.1	1583709	1584890	-	WP_007052550.1	WP_007052550.1				1182	393
BLGT_RS07150	BLGT_07350	amino acid ABC transporter permease	-583617	-3.56501	-7.25415	-2.03482	CDS	with_protein	GCF_000772485.1	Primary Assembly	chromosome		NZ_CP006741.1	1697151	1697897	-	WP_007054027.1	WP_007054027.1				747	248
BLGT_RS04600	BLGT_04710	CTP synthase	-97672			-2.03482	CDS	with_protein	GCF_000772485.1	Primary Assembly	chromosome		NZ_CP006741.1	1114280	1115941	+	WP_007052143.1	WP_007052143.1				1662	553
BLGT_RS04185	BLGT_04280	trigger factor	1039516			-2.03672	CDS	with_protein	GCF_000772485.1	Primary Assembly	chromosome		NZ_CP006741.1	1018269	1019648	+	WP_007052055.1	WP_007052055.1				1380	459
BLGT_RS08720	BLGT_08935	50S ribosomal protein L29	-1435639			-2.03757	CDS	with_protein	GCF_000772485.1	Primary Assembly	chromosome		NZ_CP006741.1	2059164	2059415	-	WP_003829891.1	WP_003829891.1		rpmC		252	83
BLGT_RS02580	BLGT_02645	DUF624 domain-containing protein	-136077	-2.38636	-4.86462	-2.03851	CDS	with_protein	GCF_000772485.1	Primary Assembly	chromosome		NZ_CP006741.1	623776	624453	+	WP_007055207.1	WP_007055207.1				678	225
BLGT_RS02040	BLGT_02085	acyltransferase	47361		-2.7621	-2.03898	CDS	with_protein	GCF_000772485.1	Primary Assembly	chromosome		NZ_CP006741.1	488376	489188	+	WP_032683202.1	WP_032683202.1				813	270
BLGT_RS02230	BLGT_02285	50S ribosomal protein L19	880621			-2.0407	CDS	with_protein	GCF_000772485.1	Primary Assembly	chromosome		NZ_CP006741.1	536549	536914	+	WP_038426297.1	WP_038426297.1		rplS		366	121
BLGT_RS06040		EamA family transporter	-138096		-2.48256	-2.04255	CDS	without_protein	GCF_000772485.1	Primary Assembly	chromosome		NZ_CP006741.1	1417535	1418469	+						935		pseudo
BLGT_RS05395	BLGT_05535	tRNA-Cys	677666			-2.04303	tRNA		GCF_000772485.1	Primary Assembly	chromosome		NZ_CP006741.1	1280373	1280443	-						71		anticodon=GCA
BLGT_RS08255	BLGT_08450	tRNA lysidine(34) synthetase TilS	-1256269		-3.87116	-2.04536	CDS	with_protein	GCF_000772485.1	Primary Assembly	chromosome		NZ_CP006741.1	1958109	1959275	-	WP_013582907.1	WP_013582907.1		tilS		1167	388
BLGT_RS02835	BLGT_02900	MFS transporter	938911			-2.05242	CDS	with_protein	GCF_000772485.1	Primary Assembly	chromosome		NZ_CP006741.1	703006	704325	+	WP_007053725.1	WP_007053725.1				1320	439
BLGT_RS06895	BLGT_07085	ATP-binding protein	-736156			-2.05425	CDS	with_protein	GCF_000772485.1	Primary Assembly	chromosome		NZ_CP006741.1	1643236	1643715	-	WP_007053326.1	WP_007053326.1				480	159
BLGT_RS03705	BLGT_03790	threonine synthase	418391		-3.17282	-2.05452	CDS	with_protein	GCF_000772485.1	Primary Assembly	chromosome		NZ_CP006741.1	907559	909049	-	WP_007051138.1	WP_007051138.1				1491	496
BLGT_RS05595	BLGT_05735	phosphatidate cytidylyltransferase	-1138579		-2.04962	-2.05947	CDS	with_protein	GCF_000772485.1	Primary Assembly	chromosome		NZ_CP006741.1	1327440	1328426	-	WP_032737738.1	WP_032737738.1				987	328
BLGT_RS10510	BLGT_00745	chromosome condensation protein CrcB	1377660	-2.57178	-5.29907	-2.06047	CDS	with_protein	GCF_000772485.1	Primary Assembly	chromosome		NZ_CP006741.1	189847	190890	+	WP_038426599.1	WP_038426599.1				1044	347
BLGT_RS06625	BLGT_06820	sugar ABC transporter permease	-1165720			-2.06242	CDS	with_protein	GCF_000772485.1	Primary Assembly	chromosome		NZ_CP006741.1	1568550	1569521	-	WP_032682526.1	WP_032682526.1				972	323
BLGT_RS01625	BLGT_01665	hypothetical protein	429814		-2.48837	-2.06256	CDS	with_protein	GCF_000772485.1	Primary Assembly	chromosome		NZ_CP006741.1	403801	404484	+	WP_032741254.1	WP_032741254.1				684	227
BLGT_RS03365	BLGT_03450	glycosyltransferase	217553	-2.8967	-5.98934	-2.06764	CDS	with_protein	GCF_000772485.1	Primary Assembly	chromosome		NZ_CP006741.1	834298	835458	+	WP_007051205.1	WP_007051205.1				1161	386
BLGT_RS04335	BLGT_04425	AAA family ATPase	491502			-2.07523	CDS	with_protein	GCF_000772485.1	Primary Assembly	chromosome		NZ_CP006741.1	1053011	1054453	-	WP_038426369.1	WP_038426369.1				1443	480
BLGT_RS06545	BLGT_06730	peptide ABC transporter substrate-binding protein	-1498322	-3.1848	-6.61085	-2.07575	CDS	with_protein	GCF_000772485.1	Primary Assembly	chromosome		NZ_CP006741.1	1545955	1547589	-	WP_007057390.1	WP_007057390.1				1635	544
BLGT_RS00155	BLGT_00150	class 1b ribonucleoside-diphosphate reductase subunit beta	938152		-3.53155	-2.0885	CDS	with_protein	GCF_000772485.1	Primary Assembly	chromosome		NZ_CP006741.1	49267	50259	-	WP_011068610.1	WP_011068610.1		nrdF		993	330
BLGT_RS04060	BLGT_04145	tRNA-Gln	426133			-2.0915	tRNA		GCF_000772485.1	Primary Assembly	chromosome		NZ_CP006741.1	988411	988481	-						71		anticodon=TTG
BLGT_RS06025	BLGT_06185	histidine phosphatase family protein	-835323		-2.42007	-2.09181	CDS	with_protein	GCF_000772485.1	Primary Assembly	chromosome		NZ_CP006741.1	1414614	1415459	-	WP_007052680.1	WP_007052680.1				846	281
BLGT_RS02390		sugar transferase	1480641		-2.58974	-2.10908	CDS	with_protein	GCF_000772485.1	Primary Assembly	chromosome		NZ_CP006741.1	580136	581845	-	WP_038426304.1	WP_038426304.1				1710	569
BLGT_RS08755	BLGT_08970	50S ribosomal protein L4	-1198462			-2.10953	CDS	with_protein	GCF_000772485.1	Primary Assembly	chromosome		NZ_CP006741.1	2062486	2063142	-	WP_038426545.1	WP_038426545.1		rplD		657	218
BLGT_RS03510		DUF3043 domain-containing protein	85307			-2.11496	CDS	with_protein	GCF_000772485.1	Primary Assembly	chromosome		NZ_CP006741.1	864680	865195	-	WP_013411023.1	WP_013411023.1				516	171
BLGT_RS03890	BLGT_03970	CarD family transcriptional regulator	-432002			-2.1164	CDS	with_protein	GCF_000772485.1	Primary Assembly	chromosome		NZ_CP006741.1	950502	951095	+	WP_007053566.1	WP_007053566.1				594	197
BLGT_RS10545		hypothetical protein	350862			-2.12135	CDS	with_protein	GCF_000772485.1	Primary Assembly	chromosome		NZ_CP006741.1	519093	519287	+	WP_144314103.1	WP_144314103.1				195	64
BLGT_RS03535	BLGT_03620	RNA methyltransferase	74754			-2.12671	CDS	with_protein	GCF_000772485.1	Primary Assembly	chromosome		NZ_CP006741.1	870149	871033	+	WP_011068280.1	WP_011068280.1				885	294
BLGT_RS03870	BLGT_03950	S24 family peptidase	1116011			-2.12748	CDS	with_protein	GCF_000772485.1	Primary Assembly	chromosome		NZ_CP006741.1	945787	946173	-	WP_007051907.1	WP_007051907.1				387	128
BLGT_RS08750	BLGT_08965	50S ribosomal protein L23	271969			-2.12913	CDS	with_protein	GCF_000772485.1	Primary Assembly	chromosome		NZ_CP006741.1	2062184	2062480	-	WP_007053033.1	WP_007053033.1		rplW		297	98
BLGT_RS09720	BLGT_09970	YhgE/Pip domain-containing protein	-1132594		-2.27961	-2.13108	CDS	with_protein	GCF_000772485.1	Primary Assembly	chromosome		NZ_CP006741.1	2334449	2336788	+	WP_038426594.1	WP_038426594.1				2340	779
BLGT_RS04970	BLGT_05105	dihydroorotate dehydrogenase	281736		-2.06049	-2.13177	CDS	with_protein	GCF_000772485.1	Primary Assembly	chromosome		NZ_CP006741.1	1204194	1205165	+	WP_029680096.1	WP_029680096.1				972	323
BLGT_RS06315	BLGT_06485	ABC transporter ATP-binding protein	540765			-2.13386	CDS	with_protein	GCF_000772485.1	Primary Assembly	chromosome		NZ_CP006741.1	1486901	1488910	-	WP_038426458.1	WP_038426458.1				2010	669
BLGT_RS10370	BLGT_08760	AURKAIP1/COX24 domain-containing protein	-1280130			-2.14333	CDS	with_protein	GCF_000772485.1	Primary Assembly	chromosome		NZ_CP006741.1	2029675	2029764	-	WP_004268639.1	WP_004268639.1				90	29
BLGT_RS03015	BLGT_03090	pyridoxal-phosphate dependent enzyme	716806		-3.78088	-2.15573	CDS	with_protein	GCF_000772485.1	Primary Assembly	chromosome		NZ_CP006741.1	749634	750701	+	WP_013582428.1	WP_013582428.1				1068	355
BLGT_RS06235	BLGT_06405	DMT family transporter	-338744			-2.16181	CDS	with_protein	GCF_000772485.1	Primary Assembly	chromosome		NZ_CP006741.1	1467507	1468523	-	WP_007052632.1	WP_007052632.1				1017	338
BLGT_RS04675	BLGT_04785	HlyC/CorC family transporter	-1005595		-2.19303	-2.17063	CDS	with_protein	GCF_000772485.1	Primary Assembly	chromosome		NZ_CP006741.1	1129779	1131212	+	WP_007052157.1	WP_007052157.1				1434	477
BLGT_RS00480	BLGT_00480	threonine/serine exporter family protein	711899			-2.17186	CDS	with_protein	GCF_000772485.1	Primary Assembly	chromosome		NZ_CP006741.1	125617	127497	+	WP_038426232.1	WP_038426232.1				1881	626
BLGT_RS03390	BLGT_03475	30S ribosomal protein S7	-653099	3.11642		-2.18871	CDS	with_protein	GCF_000772485.1	Primary Assembly	chromosome		NZ_CP006741.1	839396	839866	+	WP_003828652.1	WP_003828652.1		rpsG		471	156
BLGT_RS00740	BLGT_00735	adenylosuccinate synthase	364554		-2.01213	-2.18934	CDS	with_protein	GCF_000772485.1	Primary Assembly	chromosome		NZ_CP006741.1	186767	188053	+	WP_007051668.1	WP_007051668.1				1287	428
BLGT_RS02295	BLGT_02350	MFS transporter	-451010		-3.3689	-2.19083	CDS	with_protein	GCF_000772485.1	Primary Assembly	chromosome		NZ_CP006741.1	552607	552963	+	WP_007051381.1	WP_007051381.1				357	118
BLGT_RS00380	BLGT_00370	hypothetical protein	1609237	-3.5518	-7.78609	-2.19215	CDS	with_protein	GCF_000772485.1	Primary Assembly	chromosome		NZ_CP006741.1	101953	102801	+	WP_038426226.1	WP_038426226.1				849	282
BLGT_RS10665	BLGT_07415	hypothetical protein	-1631139		-2.06253	-2.19984	CDS	with_protein	GCF_000772485.1	Primary Assembly	chromosome		NZ_CP006741.1	1712038	1712328	-	WP_007058682.1	WP_007058682.1				291	96
BLGT_RS00290	BLGT_00285	membrane protein insertase YidC	2113789			-2.20188	CDS	with_protein	GCF_000772485.1	Primary Assembly	chromosome		NZ_CP006741.1	81189	82196	-	WP_007051771.1	WP_007051771.1		yidC		1008	335
BLGT_RS09245	BLGT_09480	diaminopimelate decarboxylase	-588053			-2.2091	CDS	with_protein	GCF_000772485.1	Primary Assembly	chromosome		NZ_CP006741.1	2195985	2197577	-	WP_038426568.1	WP_038426568.1				1593	530
BLGT_RS06770	BLGT_06965	hemagglutinin	-121562		-3.62549	-2.21362	CDS	with_protein	GCF_000772485.1	Primary Assembly	chromosome		NZ_CP006741.1	1609524	1610495	+	WP_080746369.1	WP_080746369.1				972	323
BLGT_RS06320	BLGT_06490	ABC transporter permease	-1384057			-2.22343	CDS	with_protein	GCF_000772485.1	Primary Assembly	chromosome		NZ_CP006741.1	1488933	1489937	-	WP_022527682.1	WP_022527682.1				1005	334
BLGT_RS00405	BLGT_00400	M48 family metallopeptidase	949799		-2.67483	-2.22435	CDS	with_protein	GCF_000772485.1	Primary Assembly	chromosome		NZ_CP006741.1	105880	106686	+	WP_007054570.1	WP_007054570.1				807	268
BLGT_RS04350		hypothetical protein	-634632		-3.54828	-2.22606	CDS	with_protein	GCF_000772485.1	Primary Assembly	chromosome		NZ_CP006741.1	1056485	1056784	-	WP_011068200.1	WP_011068200.1				300	99
BLGT_RS01735	BLGT_01780	NAD(P)-dependent glycerol-3-phosphate dehydrogenase	1066803		-2.39706	-2.22647	CDS	with_protein	GCF_000772485.1	Primary Assembly	chromosome		NZ_CP006741.1	422152	423153	+	WP_007051468.1	WP_007051468.1				1002	333
BLGT_RS06325	BLGT_06495	ABC transporter permease	-47173			-2.23202	CDS	with_protein	GCF_000772485.1	Primary Assembly	chromosome		NZ_CP006741.1	1489956	1490882	-	WP_003832137.1	WP_003832137.1				927	308
BLGT_RS06130	BLGT_06295	polyprenyl synthetase family protein	-816767			-2.23935	CDS	with_protein	GCF_000772485.1	Primary Assembly	chromosome		NZ_CP006741.1	1443709	1444827	+	WP_080556053.1	WP_080556053.1				1119	372
BLGT_RS02600	BLGT_02665	PFL family protein	-314946	-2.14192	-4.82311	-2.25177	CDS	with_protein	GCF_000772485.1	Primary Assembly	chromosome		NZ_CP006741.1	628060	629424	+	WP_007055183.1	WP_007055183.1				1365	454
BLGT_RS01245	BLGT_01265	TetR/AcrR family transcriptional regulator	-241707			-2.25934	CDS	with_protein	GCF_000772485.1	Primary Assembly	chromosome		NZ_CP006741.1	314478	315317	-	WP_007051567.1	WP_007051567.1				840	279
BLGT_RS00260	BLGT_00255	virulence factor MVIN family protein	1498801		-2.02722	-2.26414	CDS	with_protein	GCF_000772485.1	Primary Assembly	chromosome		NZ_CP006741.1	73610	75673	+	WP_038426221.1	WP_038426221.1				2064	687
BLGT_RS06640	BLGT_06835	alpha-mannosidase	524639		-2.18906	-2.27281	CDS	with_protein	GCF_000772485.1	Primary Assembly	chromosome		NZ_CP006741.1	1574474	1577593	-	WP_038426466.1	WP_038426466.1				3120	1039
BLGT_RS08920	BLGT_09140	tRNA-Met	-1675400			-2.28643	tRNA		GCF_000772485.1	Primary Assembly	chromosome		NZ_CP006741.1	2102232	2102305	-						74		anticodon=CAT
BLGT_RS01755	BLGT_01800	ABC transporter permease subunit	-355959		-2.40654	-2.28796	CDS	with_protein	GCF_000772485.1	Primary Assembly	chromosome		NZ_CP006741.1	426905	427759	+	WP_007051464.1	WP_007051464.1				855	284
BLGT_RS00255	BLGT_00250	murein biosynthesis integral membrane protein MurJ	54203		-2.29661	-2.29977	CDS	with_protein	GCF_000772485.1	Primary Assembly	chromosome		NZ_CP006741.1	71800	73527	+	WP_038426220.1	WP_038426220.1				1728	575
BLGT_RS00485	BLGT_00485	sodium/proline symporter	1671241		-3.10384	-2.30901	CDS	with_protein	GCF_000772485.1	Primary Assembly	chromosome		NZ_CP006741.1	127730	129370	+	WP_007054550.1	WP_007054550.1				1641	546
BLGT_RS07580		hypothetical protein	26152		-2.48361	-2.31451	CDS	without_protein	GCF_000772485.1	Primary Assembly	chromosome		NZ_CP006741.1	1800611	1801239	+						629		pseudo
BLGT_RS10310		hypothetical protein	-1101717			-2.32273	CDS	without_protein	GCF_000772485.1	Primary Assembly	chromosome		NZ_CP006741.1	1827391	1827588	-						198		partial;pseudo
BLGT_RS02925	BLGT_02995	amino acid ABC transporter ATP-binding protein	1337106		-2.2047	-2.32369	CDS	with_protein	GCF_000772485.1	Primary Assembly	chromosome		NZ_CP006741.1	725871	726701	+	WP_007056434.1	WP_007056434.1				831	276
BLGT_RS08765	BLGT_08980	30S ribosomal protein S10	-966			-2.32763	CDS	with_protein	GCF_000772485.1	Primary Assembly	chromosome		NZ_CP006741.1	2063807	2064115	-	WP_003827292.1	WP_003827292.1		rpsJ		309	102
BLGT_RS08760	BLGT_08975	50S ribosomal protein L3	-1805936			-2.33062	CDS	with_protein	GCF_000772485.1	Primary Assembly	chromosome		NZ_CP006741.1	2063149	2063790	-	WP_007053031.1	WP_007053031.1		rplC		642	213
BLGT_RS01030	BLGT_01045	penicillin-binding protein	1975336			-2.33316	CDS	with_protein	GCF_000772485.1	Primary Assembly	chromosome		NZ_CP006741.1	257854	260268	-	WP_007051608.1	WP_007051608.1				2415	804
BLGT_RS09390	BLGT_09635	IS30-like element ISBlo4 family transposase	-631484			-2.34011	CDS	with_protein	GCF_000772485.1	Primary Assembly	chromosome		NZ_CP006741.1	2235604	2236875	+	WP_008783747.1	WP_008783747.1				1272	423
BLGT_RS06765	BLGT_06960	DUF3418 domain-containing protein	-1120221		-2.65042	-2.39282	CDS	with_protein	GCF_000772485.1	Primary Assembly	chromosome		NZ_CP006741.1	1605391	1609527	+	WP_007056518.1	WP_007056518.1				4137	1378
BLGT_RS02045	BLGT_02090	cytosine permease	-198184		-4.02141	-2.39965	CDS	with_protein	GCF_000772485.1	Primary Assembly	chromosome		NZ_CP006741.1	489306	490670	+	WP_038426285.1	WP_038426285.1				1365	454
BLGT_RS01160	BLGT_01180	amino acid ABC transporter substrate-binding protein	1189106	-2.74678	-6.59313	-2.40031	CDS	with_protein	GCF_000772485.1	Primary Assembly	chromosome		NZ_CP006741.1	292486	293169	+	WP_007051584.1	WP_007051584.1				684	227
BLGT_RS06290	BLGT_06460	hypothetical protein	315496		-2.63915	-2.40308	CDS	with_protein	GCF_000772485.1	Primary Assembly	chromosome		NZ_CP006741.1	1482275	1482970	-	WP_023658436.1	WP_023658436.1				696	231
BLGT_RS07570	BLGT_07765	VWA domain-containing protein	-485716		-2.62451	-2.40709	CDS	with_protein	GCF_000772485.1	Primary Assembly	chromosome		NZ_CP006741.1	1798466	1799524	+	WP_007053966.1	WP_007053966.1				1059	352
BLGT_RS05525	BLGT_05665	DUF3375 domain-containing protein	-184225		-2.31413	-2.40921	CDS	with_protein	GCF_000772485.1	Primary Assembly	chromosome		NZ_CP006741.1	1313808	1315439	-	WP_007056076.1	WP_007056076.1				1632	543
BLGT_RS04680	BLGT_04790	GTPase Era	863659		-2.9734	-2.41156	CDS	with_protein	GCF_000772485.1	Primary Assembly	chromosome		NZ_CP006741.1	1131214	1132278	+	WP_007052158.1	WP_007052158.1				1065	354
BLGT_RS08435	BLGT_08630	alpha/beta hydrolase	-341110			-2.41163	CDS	with_protein	GCF_000772485.1	Primary Assembly	chromosome		NZ_CP006741.1	1995937	1997538	-	WP_038426538.1	WP_038426538.1				1602	533
BLGT_RS06950		hypothetical protein	423947	2.24527		-2.41887	CDS	with_protein	GCF_000772485.1	Primary Assembly	chromosome		NZ_CP006741.1	1656428	1656694	-	WP_007054063.1	WP_007054063.1				267	88
BLGT_RS08825	BLGT_09045	50S ribosomal protein L13	-963			-2.44002	CDS	with_protein	GCF_000772485.1	Primary Assembly	chromosome		NZ_CP006741.1	2080641	2081090	-	WP_007053026.1	WP_007053026.1		rplM		450	149
BLGT_RS08820	BLGT_09040	30S ribosomal protein S9	-409336			-2.44381	CDS	with_protein	GCF_000772485.1	Primary Assembly	chromosome		NZ_CP006741.1	2080127	2080618	-	WP_003829868.1	WP_003829868.1		rpsI		492	163
BLGT_RS07015	BLGT_07210	DNA repair protein RecO	-619582	-2.15708	-5.27748	-2.44659	CDS	with_protein	GCF_000772485.1	Primary Assembly	chromosome		NZ_CP006741.1	1671282	1672001	-	WP_007054051.1	WP_007054051.1		recO		720	239
BLGT_RS04325	BLGT_04420	DUF1829 domain-containing protein	-561997		-2.64195	-2.45459	CDS	without_protein	GCF_000772485.1	Primary Assembly	chromosome		NZ_CP006741.1	1052419	1052669	-						251		partial;pseudo
BLGT_RS02050	BLGT_02095	DUF917 domain-containing protein	1482935		-4.46287	-2.45461	CDS	with_protein	GCF_000772485.1	Primary Assembly	chromosome		NZ_CP006741.1	490672	491775	+	WP_007057835.1	WP_007057835.1				1104	367
BLGT_RS08330	BLGT_08525	branched-chain amino acid ABC transporter permease	-762238			-2.45842	CDS	with_protein	GCF_000772485.1	Primary Assembly	chromosome		NZ_CP006741.1	1974710	1975726	+	WP_080746379.1	WP_080746379.1				1017	338
BLGT_RS05010		hypothetical protein	-263242		-3.28962	-2.46025	CDS	without_protein	GCF_000772485.1	Primary Assembly	chromosome		NZ_CP006741.1	1213488	1214444	-						957		pseudo
BLGT_RS03895	BLGT_03975	2-C-methyl-D-erythritol 2,4-cyclodiphosphate synthase	-400981			-2.46391	CDS	with_protein	GCF_000772485.1	Primary Assembly	chromosome		NZ_CP006741.1	951202	951726	+	WP_023658184.1	WP_023658184.1				525	174
BLGT_RS02290	BLGT_02345	long-chain fatty acid--CoA ligase	1246953		-2.39932	-2.46577	CDS	with_protein	GCF_000772485.1	Primary Assembly	chromosome		NZ_CP006741.1	550745	552568	-	WP_007057840.1	WP_007057840.1				1824	607
BLGT_RS07575	BLGT_07770	VWA domain-containing protein	-1021182		-2.76608	-2.46596	CDS	with_protein	GCF_000772485.1	Primary Assembly	chromosome		NZ_CP006741.1	1799521	1800552	+	WP_021975281.1	WP_021975281.1				1032	343
BLGT_RS03145	BLGT_03225	putative hydro-lyase	80211	2.35917		-2.47299	CDS	with_protein	GCF_000772485.1	Primary Assembly	chromosome		NZ_CP006741.1	779370	780209	+	WP_144314110.1	WP_144314110.1				840	279
BLGT_RS03495	BLGT_03580	type I glutamate--ammonia ligase	-446873			-2.47334	CDS	with_protein	GCF_000772485.1	Primary Assembly	chromosome		NZ_CP006741.1	860420	861856	-	WP_013582464.1	WP_013582464.1		glnA		1437	478
BLGT_RS01695	BLGT_01740	peptidylprolyl isomerase	603860		-2.82817	-2.47858	CDS	with_protein	GCF_000772485.1	Primary Assembly	chromosome		NZ_CP006741.1	414983	415972	-	WP_007051475.1	WP_007051475.1				990	329
BLGT_RS04190	BLGT_04285	chloride channel protein	589950			-2.47984	CDS	with_protein	GCF_000772485.1	Primary Assembly	chromosome		NZ_CP006741.1	1019832	1021298	+	WP_007055376.1	WP_007055376.1				1467	488
BLGT_RS06780	BLGT_06975	type I glutamate--ammonia ligase	-656549		-2.86573	-2.48201	CDS	with_protein	GCF_000772485.1	Primary Assembly	chromosome		NZ_CP006741.1	1611248	1612585	-	WP_007052524.1	WP_007052524.1		glnA		1338	445
BLGT_RS03920	BLGT_04000	30S ribosomal protein S1	696127		-2.05986	-2.48752	CDS	with_protein	GCF_000772485.1	Primary Assembly	chromosome		NZ_CP006741.1	956036	957511	+	WP_008782799.1	WP_008782799.1		rpsA		1476	491
BLGT_RS06945	BLGT_07135	phosphomethylpyrimidine synthase ThiC	-1351855	2.38685		-2.49139	CDS	with_protein	GCF_000772485.1	Primary Assembly	chromosome		NZ_CP006741.1	1653638	1656391	+	WP_011067965.1	WP_011067965.1		thiC		2754	917
BLGT_RS01205	BLGT_01225	putative ABC transporter permease	749716		-4.61153	-2.49346	CDS	with_protein	GCF_000772485.1	Primary Assembly	chromosome		NZ_CP006741.1	304536	305822	+	WP_038426258.1	WP_038426258.1				1287	428
BLGT_RS10735	BLGT_04435	hypothetical protein	275174		-3.17145	-2.50599	CDS	with_protein	GCF_000772485.1	Primary Assembly	chromosome		NZ_CP006741.1	1055538	1055747	-	WP_158332787.1	WP_158332787.1				210	69
BLGT_RS05615	BLGT_05755	30S ribosomal protein S2	865814			-2.51376	CDS	with_protein	GCF_000772485.1	Primary Assembly	chromosome		NZ_CP006741.1	1330921	1331766	-	WP_007056702.1	WP_007056702.1		rpsB		846	281
BLGT_RS09250		arginine--tRNA ligase	-1209737			-2.51814	CDS	without_protein	GCF_000772485.1	Primary Assembly	chromosome		NZ_CP006741.1	2197580	2199443	-						1864		pseudo
BLGT_RS04070	BLGT_04155	acetyltransferase	102131		-3.24285	-2.52448	CDS	with_protein	GCF_000772485.1	Primary Assembly	chromosome		NZ_CP006741.1	989706	991580	-	WP_007052034.1	WP_007052034.1				1875	624
BLGT_RS04515	BLGT_04620	UvrD-helicase domain-containing protein	1018539			-2.53196	CDS	with_protein	GCF_000772485.1	Primary Assembly	chromosome		NZ_CP006741.1	1093711	1096413	+	WP_007055502.1	WP_007055502.1				2703	900
BLGT_RS08985	BLGT_09205	50S ribosomal protein L7/L12	-732075	2.77501		-2.55314	CDS	with_protein	GCF_000772485.1	Primary Assembly	chromosome		NZ_CP006741.1	2114952	2115332	-	WP_007053002.1	WP_007053002.1		rplL		381	126
BLGT_RS05870	BLGT_06025	DNA (cytosine-5-)-methyltransferase	-839595		-2.75985	-2.55911	CDS	with_protein	GCF_000772485.1	Primary Assembly	chromosome		NZ_CP006741.1	1383257	1384228	+	WP_007057142.1	WP_007057142.1		dcm		972	323
BLGT_RS02265	BLGT_02320	gamma-glutamyl-gamma-aminobutyrate hydrolase family protein	-192542		-3.07777	-2.55979	CDS	with_protein	GCF_000772485.1	Primary Assembly	chromosome		NZ_CP006741.1	544633	545349	-	WP_007057865.1	WP_007057865.1				717	238
BLGT_RS01390	BLGT_01410	aquaporin family protein	288199		-2.76655	-2.5661	CDS	with_protein	GCF_000772485.1	Primary Assembly	chromosome		NZ_CP006741.1	352807	353541	+	WP_013410393.1	WP_013410393.1				735	244
BLGT_RS02660	BLGT_02725	oligosaccharide flippase family protein	-34120			-2.5697	CDS	with_protein	GCF_000772485.1	Primary Assembly	chromosome		NZ_CP006741.1	641740	643149	+	WP_038426318.1	WP_038426318.1				1410	469
BLGT_RS02530	BLGT_02585	penicillin-binding protein	13138			-2.57141	CDS	with_protein	GCF_000772485.1	Primary Assembly	chromosome		NZ_CP006741.1	609029	611344	+	WP_038426310.1	WP_038426310.1				2316	771
BLGT_RS02585	BLGT_02650	LacI family DNA-binding transcriptional regulator	1118926		-2.98774	-2.57638	CDS	with_protein	GCF_000772485.1	Primary Assembly	chromosome		NZ_CP006741.1	624482	625573	+	WP_038426313.1	WP_038426313.1				1092	363
BLGT_RS07350	BLGT_07545	D-2-hydroxyacid dehydrogenase	300087			-2.58643	CDS	with_protein	GCF_000772485.1	Primary Assembly	chromosome		NZ_CP006741.1	1744499	1745395	-	WP_080746429.1	WP_080746429.1				897	298
BLGT_RS08615	BLGT_08825	circularly permuted type 2 ATP-grasp protein	-1195025			-2.59249	CDS	with_protein	GCF_000772485.1	Primary Assembly	chromosome		NZ_CP006741.1	2045482	2047662	-	WP_038426544.1	WP_038426544.1				2181	726
BLGT_RS03460	BLGT_03545	ATP-binding cassette domain-containing protein	348217		-2.61496	-2.60095	CDS	with_protein	GCF_000772485.1	Primary Assembly	chromosome		NZ_CP006741.1	852637	855150	+	WP_077384445.1	WP_077384445.1				2514	837
BLGT_RS04965	BLGT_05100	dihydroorotate dehydrogenase electron transfer subunit	711517		-2.37992	-2.61024	CDS	with_protein	GCF_000772485.1	Primary Assembly	chromosome		NZ_CP006741.1	1203367	1204191	+	WP_038426399.1	WP_038426399.1				825	274
BLGT_RS08055	BLGT_08240	peptide chain release factor 1	-10279			-2.63627	CDS	with_protein	GCF_000772485.1	Primary Assembly	chromosome		NZ_CP006741.1	1915708	1916796	-	WP_038426524.1	WP_038426524.1		prfA		1089	362
BLGT_RS08010	BLGT_08195	undecaprenyl/decaprenyl-phosphate alpha-N-acetylglucosaminyl 1-phosphate transferase	-1182941		-2.71094	-2.63795	CDS	with_protein	GCF_000772485.1	Primary Assembly	chromosome		NZ_CP006741.1	1906517	1907800	-	WP_007052448.1	WP_007052448.1				1284	427
BLGT_RS02920	BLGT_02990	amino acid ABC transporter permease	-537777		-2.41982	-2.6407	CDS	with_protein	GCF_000772485.1	Primary Assembly	chromosome		NZ_CP006741.1	724859	725854	+	WP_008783148.1	WP_008783148.1				996	331
BLGT_RS00745	BLGT_00740	ClC family H(+)/Cl(-) exchange transporter	98575		-2.39008	-2.64131	CDS	with_protein	GCF_000772485.1	Primary Assembly	chromosome		NZ_CP006741.1	188077	189660	+	WP_007051667.1	WP_007051667.1				1584	527
BLGT_RS01140	BLGT_01155	DUF1275 domain-containing protein	1526398		-3.98317	-2.64445	CDS	with_protein	GCF_000772485.1	Primary Assembly	chromosome		NZ_CP006741.1	288235	289119	-	WP_131206310.1	WP_131206310.1				885	294
BLGT_RS07650	BLGT_07845	DedA family protein	-794805		-3.74658	-2.64502	CDS	with_protein	GCF_000772485.1	Primary Assembly	chromosome		NZ_CP006741.1	1815517	1816215	-	WP_007057155.1	WP_007057155.1				699	232
BLGT_RS04195	BLGT_04290	hypothetical protein	294496			-2.67932	CDS	with_protein	GCF_000772485.1	Primary Assembly	chromosome		NZ_CP006741.1	1021410	1021790	+	WP_007052057.1	WP_007052057.1				381	126
BLGT_RS05535	BLGT_05675	energy-coupling factor transporter transmembrane protein EcfT	658736	-2.2199	-5.993	-2.69967	CDS	with_protein	GCF_000772485.1	Primary Assembly	chromosome		NZ_CP006741.1	1316286	1316987	+	WP_007054304.1	WP_007054304.1				702	233
BLGT_RS08335	BLGT_08530	branched-chain amino acid permease	-946350		-2.52961	-2.75692	CDS	with_protein	GCF_000772485.1	Primary Assembly	chromosome		NZ_CP006741.1	1975723	1976055	+	WP_007052362.1	WP_007052362.1				333	110
BLGT_RS04245	BLGT_04340	FAD-binding protein	-626848		-2.45604	-2.77297	CDS	with_protein	GCF_000772485.1	Primary Assembly	chromosome		NZ_CP006741.1	1029705	1031570	-	WP_007053431.1	WP_007053431.1				1866	621
BLGT_RS09940		helix-turn-helix transcriptional regulator	914360		-2.10929	-2.77805	CDS	with_protein	GCF_000772485.1	Primary Assembly	chromosome		NZ_CP006741.1	404722	404958	-	WP_007051486.1	WP_007051486.1				237	78
BLGT_RS05550	BLGT_05690	metallopeptidase family protein	-1006266		-2.71356	-2.77813	CDS	with_protein	GCF_000772485.1	Primary Assembly	chromosome		NZ_CP006741.1	1319318	1319686	-	WP_007052767.1	WP_007052767.1				369	122
BLGT_RS01240	BLGT_01260	glycosyltransferase family 2 protein	1800987		-3.30967	-2.80041	CDS	with_protein	GCF_000772485.1	Primary Assembly	chromosome		NZ_CP006741.1	313420	314454	-	WP_007056302.1	WP_007056302.1				1035	344
BLGT_RS08990	BLGT_09210	50S ribosomal protein L10	-1059150	2.93554		-2.80899	CDS	with_protein	GCF_000772485.1	Primary Assembly	chromosome		NZ_CP006741.1	2115441	2115962	-	WP_007053001.1	WP_007053001.1		rplJ		522	173
BLGT_RS04355	BLGT_04450	DHA2 family efflux MFS transporter permease subunit	31149		-2.40384	-2.90774	CDS	with_protein	GCF_000772485.1	Primary Assembly	chromosome		NZ_CP006741.1	1056812	1058863	+	WP_038426370.1	WP_038426370.1				2052	683
BLGT_RS04490	BLGT_04595	alpha/beta hydrolase	-773781		-3.08875	-2.96822	CDS	with_protein	GCF_000772485.1	Primary Assembly	chromosome		NZ_CP006741.1	1090012	1090833	+	WP_038426379.1	WP_038426379.1				822	273
BLGT_RS01255	BLGT_01275	ammonium transporter	1461035			-2.974	CDS	with_protein	GCF_000772485.1	Primary Assembly	chromosome		NZ_CP006741.1	317052	318347	+	WP_003828095.1	WP_003828095.1		amt		1296	431
BLGT_RS07485	BLGT_07680	PucR family transcriptional regulator	-985966		-3.72439	-2.99633	CDS	with_protein	GCF_000772485.1	Primary Assembly	chromosome		NZ_CP006741.1	1779382	1780884	-	WP_007056629.1	WP_007056629.1				1503	500
BLGT_RS03215		ABC transporter permease	129804	-2.244	-6.79105	-3.02631	CDS	without_protein	GCF_000772485.1	Primary Assembly	chromosome		NZ_CP006741.1	794918	796508	+						1591		pseudo
BLGT_RS03775	BLGT_03860	Ppx/GppA family phosphatase	1260236		-2.17299	-3.06708	CDS	with_protein	GCF_000772485.1	Primary Assembly	chromosome		NZ_CP006741.1	926312	927313	+	WP_032746203.1	WP_032746203.1				1002	333
BLGT_RS09215	BLGT_09445	hypothetical protein	-1261525		-2.86656	-3.08121	CDS	with_protein	GCF_000772485.1	Primary Assembly	chromosome		NZ_CP006741.1	2187549	2188997	-	WP_007053066.1	WP_007053066.1				1449	482
BLGT_RS03780	BLGT_03865	tRNA-Leu	436265		-2.63314	-3.08889	tRNA		GCF_000772485.1	Primary Assembly	chromosome		NZ_CP006741.1	927472	927550	+						79		anticodon=TAA
BLGT_RS05770	BLGT_05920	hypothetical protein	634053	-2.20987	-6.85036	-3.0999	CDS	with_protein	GCF_000772485.1	Primary Assembly	chromosome		NZ_CP006741.1	1363815	1364327	-	WP_038426436.1	WP_038426436.1				513	170
BLGT_RS08445	BLGT_08640	PspC domain-containing protein	-456607			-3.11777	CDS	without_protein	GCF_000772485.1	Primary Assembly	chromosome		NZ_CP006741.1	1998380	2000132	-						1753		pseudo
BLGT_RS06535	BLGT_06720	ABC transporter permease	93405	-3.79027	-12.0804	-3.18722	CDS	with_protein	GCF_000772485.1	Primary Assembly	chromosome		NZ_CP006741.1	1543525	1544694	-	WP_007052567.1	WP_007052567.1				1170	389
BLGT_RS06880	BLGT_07070	DNA polymerase III subunit alpha	122876		-4.33537	-3.18727	CDS	with_protein	GCF_000772485.1	Primary Assembly	chromosome		NZ_CP006741.1	1638099	1641668	-	WP_080713938.1	WP_080713938.1		dnaE		3570	1189
BLGT_RS07425	BLGT_07620	amino acid ABC transporter permease	-194444	-4.19266	-13.5124	-3.22287	CDS	with_protein	GCF_000772485.1	Primary Assembly	chromosome		NZ_CP006741.1	1764544	1765644	-	WP_038426500.1	WP_038426500.1				1101	366
BLGT_RS06635	BLGT_06830	alpha-mannosidase	104111		-2.75517	-3.23606	CDS	with_protein	GCF_000772485.1	Primary Assembly	chromosome		NZ_CP006741.1	1571200	1574352	-	WP_032682530.1	WP_032682530.1				3153	1050
BLGT_RS07045	BLGT_07245	DUF3052 domain-containing protein	318764		-2.92342	-3.2367	CDS	with_protein	GCF_000772485.1	Primary Assembly	chromosome		NZ_CP006741.1	1678463	1678879	-	WP_007058705.1	WP_007058705.1				417	138
BLGT_RS08440	BLGT_08635	hypothetical protein	-570326			-3.23812	CDS	with_protein	GCF_000772485.1	Primary Assembly	chromosome		NZ_CP006741.1	1997643	1998350	-	WP_038426539.1	WP_038426539.1				708	235
BLGT_RS06090	BLGT_06255	DNA topoisomerase IV subunit A	-360267		-3.3141	-3.24351	CDS	with_protein	GCF_000772485.1	Primary Assembly	chromosome		NZ_CP006741.1	1428024	1430753	+	WP_007052666.1	WP_007052666.1				2730	909
BLGT_RS04410	BLGT_04510	DEAD/DEAH box helicase	692978	-3.97771	-12.9757	-3.2621	CDS	with_protein	GCF_000772485.1	Primary Assembly	chromosome		NZ_CP006741.1	1070486	1072672	+	WP_013582523.1	WP_013582523.1				2187	728
BLGT_RS07430	BLGT_07625	ABC transporter permease subunit	489233	-3.94677	-13.1204	-3.32433	CDS	with_protein	GCF_000772485.1	Primary Assembly	chromosome		NZ_CP006741.1	1765650	1766327	-	WP_007053211.1	WP_007053211.1				678	225
BLGT_RS09465	BLGT_09720	hypothetical protein	-688415		-2.03555	-3.36998	CDS	with_protein	GCF_000772485.1	Primary Assembly	chromosome		NZ_CP006741.1	2255560	2256126	+	WP_133240498.1	WP_133240498.1				567	188
BLGT_RS06620	BLGT_06815	carbohydrate ABC transporter permease	26798		-3.48386	-3.39524	CDS	with_protein	GCF_000772485.1	Primary Assembly	chromosome		NZ_CP006741.1	1567711	1568550	-	WP_007057343.1	WP_007057343.1				840	279
BLGT_RS06720	BLGT_06915	AAA family ATPase	168700		-2.70928	-3.39606	CDS	with_protein	GCF_000772485.1	Primary Assembly	chromosome		NZ_CP006741.1	1595348	1597627	+	WP_038426468.1	WP_038426468.1				2280	759
BLGT_RS07435	BLGT_07630	glutamate ABC transporter substrate-binding protein	-802012	-3.36282	-11.5175	-3.42496	CDS	with_protein	GCF_000772485.1	Primary Assembly	chromosome		NZ_CP006741.1	1766327	1767127	-	WP_007057226.1	WP_007057226.1				801	266
BLGT_RS03960	BLGT_04040	DNA polymerase I	777802		-3.3363	-3.46636	CDS	with_protein	GCF_000772485.1	Primary Assembly	chromosome		NZ_CP006741.1	965115	967982	+	WP_038426357.1	WP_038426357.1		polA		2868	955
BLGT_RS07355	BLGT_07550	MFS transporter	-648975	-2.41485	-8.46761	-3.50648	CDS	with_protein	GCF_000772485.1	Primary Assembly	chromosome		NZ_CP006741.1	1745784	1747241	+	WP_021975474.1	WP_021975474.1				1458	485
BLGT_RS04530	BLGT_04635	ABC transporter ATP-binding protein	-2676	-2.7531	-9.82532	-3.56882	CDS	with_protein	GCF_000772485.1	Primary Assembly	chromosome		NZ_CP006741.1	1098266	1099234	+	WP_021975742.1	WP_021975742.1				969	322
BLGT_RS04520	BLGT_04625	DUF4418 family protein	143585	-3.37721	-12.1535	-3.59869	CDS	with_protein	GCF_000772485.1	Primary Assembly	chromosome		NZ_CP006741.1	1096558	1096956	+	WP_007052126.1	WP_007052126.1				399	132
BLGT_RS05180	BLGT_05325	teicoplanin resistance protein VanZ	303136		-4.25952	-3.61848	CDS	with_protein	GCF_000772485.1	Primary Assembly	chromosome		NZ_CP006741.1	1240541	1241560	+	WP_007052279.1	WP_007052279.1				1020	339
BLGT_RS06540	BLGT_06725	ABC transporter permease	-236193	-4.77679	-17.4167	-3.64612	CDS	with_protein	GCF_000772485.1	Primary Assembly	chromosome		NZ_CP006741.1	1544696	1545787	-	WP_007052566.1	WP_007052566.1				1092	363
BLGT_RS05515		hypothetical protein	0		-2.43589	-3.67403	CDS	without_protein	GCF_000772485.1	Primary Assembly	chromosome		NZ_CP006741.1	1309594	1313137	-						3544		pseudo
BLGT_RS05520	BLGT_05660	DUF4194 domain-containing protein	600932		-2.92179	-3.72185	CDS	with_protein	GCF_000772485.1	Primary Assembly	chromosome		NZ_CP006741.1	1313137	1313805	-	WP_011068104.1	WP_011068104.1				669	222
BLGT_RS08050	BLGT_08235	peptide chain release factor N(5)-glutamine methyltransferase	-237395		-3.67939	-3.81294	CDS	with_protein	GCF_000772485.1	Primary Assembly	chromosome		NZ_CP006741.1	1914737	1915621	-	WP_038426523.1	WP_038426523.1		prmC		885	294
BLGT_RS07040	BLGT_07240	tRNA-Val	-1191273		-4.25804	-3.89791	tRNA		GCF_000772485.1	Primary Assembly	chromosome		NZ_CP006741.1	1678226	1678299	-						74		anticodon=TAC
BLGT_RS02035	BLGT_02080	cytosine permease	1458534		-6.91923	-3.90033	CDS	with_protein	GCF_000772485.1	Primary Assembly	chromosome		NZ_CP006741.1	487026	488363	+	WP_032746059.1	WP_032746059.1				1338	445
BLGT_RS08205	BLGT_08395	ROK family glucokinase	28387	4.19298		-3.93371	CDS	with_protein	GCF_000772485.1	Primary Assembly	chromosome		NZ_CP006741.1	1946897	1947847	-	WP_007052404.1	WP_007052404.1				951	316
BLGT_RS08340	BLGT_08535	low molecular weight phosphotyrosine protein phosphatase	-1429424		-4.86332	-4.2588	CDS	with_protein	GCF_000772485.1	Primary Assembly	chromosome		NZ_CP006741.1	1976234	1976752	-	WP_007052361.1	WP_007052361.1				519	172
BLGT_RS02275	BLGT_02330	ABC transporter permease	1218503		-4.76448	-4.51278	CDS	with_protein	GCF_000772485.1	Primary Assembly	chromosome		NZ_CP006741.1	547328	548695	+	WP_038426301.1	WP_038426301.1				1368	455
BLGT_RS07440	BLGT_07635	amino acid ABC transporter ATP-binding protein	488073	-2.34803	-10.7978	-4.59868	CDS	with_protein	GCF_000772485.1	Primary Assembly	chromosome		NZ_CP006741.1	1767198	1768013	-	WP_007055647.1	WP_007055647.1				816	271
BLGT_RS10460	BLGT_09725	acyltransferase	-1707336		-2.65897	-4.61898	CDS	with_protein	GCF_000772485.1	Primary Assembly	chromosome		NZ_CP006741.1	2256086	2257264	-	WP_080714463.1	WP_080714463.1				1179	392
BLGT_RS02285	BLGT_02340	ABC transporter ATP-binding protein	253181		-4.79881	-4.81529	CDS	with_protein	GCF_000772485.1	Primary Assembly	chromosome		NZ_CP006741.1	549928	550563	+	WP_007051383.1	WP_007051383.1				636	211
BLGT_RS03255	BLGT_03335	LTA synthase family protein	-257127		-3.80612	-4.88657	CDS	with_protein	GCF_000772485.1	Primary Assembly	chromosome		NZ_CP006741.1	803744	805819	+	WP_038426342.1	WP_038426342.1				2076	691
BLGT_RS02280	BLGT_02335	ABC transporter permease	547132		-5.2866	-5.20404	CDS	with_protein	GCF_000772485.1	Primary Assembly	chromosome		NZ_CP006741.1	548692	549915	+	WP_007054836.1	WP_007054836.1				1224	407
BLGT_RS04525	BLGT_04630	ABC transporter permease	218723	-4.21614	-22.25	-5.27734	CDS	with_protein	GCF_000772485.1	Primary Assembly	chromosome		NZ_CP006741.1	1097047	1098264	+	WP_012471901.1	WP_012471901.1				1218	405
BLGT_RS05540	BLGT_05680	energy-coupling factor ABC transporter ATP-binding protein	-262756	-2.0461	-11.4441	-5.59315	CDS	with_protein	GCF_000772485.1	Primary Assembly	chromosome		NZ_CP006741.1	1316987	1318597	+	WP_038426424.1	WP_038426424.1				1611	536
BLGT_RS04345	BLGT_04440	YccF domain-containing protein	-250266		-7.35878	-5.65111	CDS	with_protein	GCF_000772485.1	Primary Assembly	chromosome		NZ_CP006741.1	1055841	1056206	-	WP_007052084.1	WP_007052084.1				366	121
BLGT_RS03260	BLGT_03340	aldehyde dehydrogenase family protein	-13837		-4.37954	-5.81692	CDS	with_protein	GCF_000772485.1	Primary Assembly	chromosome		NZ_CP006741.1	805940	807577	+	WP_038426343.1	WP_038426343.1				1638	545
BLGT_RS03210	BLGT_03290	hypothetical protein	1394088	-3.93122	-23.4957	-5.97669	CDS	with_protein	GCF_000772485.1	Primary Assembly	chromosome		NZ_CP006741.1	793740	794906	+	WP_038426341.1	WP_038426341.1				1167	388
BLGT_RS09220		ABC transporter ATP-binding protein	-958050		-4.8199	-6.57116	CDS	with_protein	GCF_000772485.1	Primary Assembly	chromosome		NZ_CP006741.1	2188994	2190067	-	WP_010081272.1	WP_010081272.1				1074	357
BLGT_RS05120		EamA family transporter	995927	2.45472	-2.69743	-6.62142	CDS	without_protein	GCF_000772485.1	Primary Assembly	chromosome		NZ_CP006741.1	1232017	1232605	+						589		pseudo
BLGT_RS09365	BLGT_09605	histidine ammonia-lyase	-1190580	-2.15605	-15.2568	-7.07631	CDS	with_protein	GCF_000772485.1	Primary Assembly	chromosome		NZ_CP006741.1	2228532	2230085	-	WP_080746393.1	WP_080746393.1		hutH		1554	517
BLGT_RS04280	BLGT_04375	FtsX-like permease family protein	187657		-3.99277	-7.23022	CDS	with_protein	GCF_000772485.1	Primary Assembly	chromosome		NZ_CP006741.1	1039505	1042147	+	WP_038426366.1	WP_038426366.1				2643	880
BLGT_RS05105	BLGT_05250	ATP-binding cassette domain-containing protein	5		-4.91615	-7.5404	CDS	with_protein	GCF_000772485.1	Primary Assembly	chromosome		NZ_CP006741.1	1229804	1230460	+	WP_013410887.1	WP_013410887.1				657	218
BLGT_RS05110	BLGT_05255	hypothetical protein	-3		-5.66349	-9.69442	CDS	with_protein	GCF_000772485.1	Primary Assembly	chromosome		NZ_CP006741.1	1230465	1231193	+	WP_038426405.1	WP_038426405.1				729	242
BLGT_RS05115	BLGT_05260	hypothetical protein	-193141		-5.53582	-10.0187	CDS	with_protein	GCF_000772485.1	Primary Assembly	chromosome		NZ_CP006741.1	1231190	1231813	+	WP_038426406.1	WP_038426406.1				624	207
BLGT_RS04275	BLGT_04370	ABC transporter ATP-binding protein	-156241		-7.57712	-11.7845	CDS	with_protein	GCF_000772485.1	Primary Assembly	chromosome		NZ_CP006741.1	1038672	1039463	+	WP_038426365.1	WP_038426365.1				792	263
BLGT_RS10070		pirin	-495771	4.88886	5.03162		CDS	with_protein	GCF_000772485.1	Primary Assembly	chromosome		NZ_CP006741.1	883222	883440	-	WP_007056876.1	WP_007056876.1				219	72
BLGT_RS01515	BLGT_01540	tyrosine-type recombinase/integrase	257	3.81624	4.05579		CDS	with_protein	GCF_000772485.1	Primary Assembly	chromosome		NZ_CP006741.1	387669	388499	+	WP_011068465.1	WP_011068465.1				831	276
BLGT_RS01525	BLGT_01550	N-acetylmuramoyl-L-alanine amidase	8085	3.62473	3.59427		CDS	with_protein	GCF_000772485.1	Primary Assembly	chromosome		NZ_CP006741.1	388756	389610	-	WP_007051509.1	WP_007051509.1				855	284
BLGT_RS01580	BLGT_01605	phage portal protein	-294090	3.44377	3.159		CDS	with_protein	GCF_000772485.1	Primary Assembly	chromosome		NZ_CP006741.1	397695	398807	-	WP_032741262.1	WP_032741262.1				1113	370
BLGT_RS00400	BLGT_00395	AAA family ATPase	289991	3.2172	3.75796		CDS	without_protein	GCF_000772485.1	Primary Assembly	chromosome		NZ_CP006741.1	104717	105790	-						1074		partial;pseudo
BLGT_RS01570	BLGT_01595	hypothetical protein	17670	3.20489	2.55279		CDS	with_protein	GCF_000772485.1	Primary Assembly	chromosome		NZ_CP006741.1	395781	396116	-	WP_050388361.1	WP_050388361.1				336	111
BLGT_RS01685	BLGT_01730	F0F1 ATP synthase subunit epsilon	1848421	3.15376	3.46219		CDS	with_protein	GCF_000772485.1	Primary Assembly	chromosome		NZ_CP006741.1	413786	414079	+	WP_007054766.1	WP_007054766.1				294	97
BLGT_RS09490	BLGT_09745	HD domain-containing protein	-1850890	3.03924	3.64338		CDS	with_protein	GCF_000772485.1	Primary Assembly	chromosome		NZ_CP006741.1	2262500	2263204	+	WP_007052900.1	WP_007052900.1				705	234
BLGT_RS01680	BLGT_01725	F0F1 ATP synthase subunit beta	748998	2.99761	3.28376		CDS	with_protein	GCF_000772485.1	Primary Assembly	chromosome		NZ_CP006741.1	412314	413786	+	WP_007051478.1	WP_007051478.1		atpD		1473	490
BLGT_RS04795	BLGT_04925	glutamate synthase subunit beta	-752937	2.99548	4.13469		CDS	with_protein	GCF_000772485.1	Primary Assembly	chromosome		NZ_CP006741.1	1162784	1164319	+	WP_011068165.1	WP_011068165.1		gltD		1536	511
BLGT_RS01675	BLGT_01720	F0F1 ATP synthase subunit gamma	-110754	2.9671	4.14199		CDS	with_protein	GCF_000772485.1	Primary Assembly	chromosome		NZ_CP006741.1	411382	412305	+	WP_007051479.1	WP_007051479.1				924	307
BLGT_RS01200	BLGT_01220	YhgE/Pip domain-containing protein	-209422	2.89765			CDS	with_protein	GCF_000772485.1	Primary Assembly	chromosome		NZ_CP006741.1	301551	304181	-	WP_038426257.1	WP_038426257.1				2631	876
BLGT_RS00345	BLGT_00335	hypothetical protein	2166164	2.85059	2.81304		CDS	with_protein	GCF_000772485.1	Primary Assembly	chromosome		NZ_CP006741.1	94759	95472	+	WP_007051759.1	WP_007051759.1				714	237
BLGT_RS09485	BLGT_09740	ATP-binding cassette domain-containing protein	-985163	2.84395	2.23692		CDS	with_protein	GCF_000772485.1	Primary Assembly	chromosome		NZ_CP006741.1	2261636	2262376	+	WP_011068674.1	WP_011068674.1				741	246
BLGT_RS05370	BLGT_05510	HIT domain-containing protein	-868050	2.80803	2.28532		CDS	with_protein	GCF_000772485.1	Primary Assembly	chromosome		NZ_CP006741.1	1277213	1277797	-	WP_007052854.1	WP_007052854.1				585	194
BLGT_RS01670	BLGT_01715	F0F1 ATP synthase subunit alpha	1416406	2.77281	4.54037		CDS	with_protein	GCF_000772485.1	Primary Assembly	chromosome		NZ_CP006741.1	409747	411378	+	WP_007051480.1	WP_007051480.1				1632	543
BLGT_RS07700	BLGT_07895	mupirocin-resistant isoleucine--tRNA ligase	-1087071	2.7622			CDS	with_protein	GCF_000772485.1	Primary Assembly	chromosome		NZ_CP006741.1	1827784	1831095	-	WP_038426510.1	WP_038426510.1		ileS		3312	1103
BLGT_RS02990	BLGT_03065	ABC transporter substrate-binding protein	1492954	2.73643	3.31979		CDS	with_protein	GCF_000772485.1	Primary Assembly	chromosome		NZ_CP006741.1	744024	745643	+	WP_007053695.1	WP_007053695.1				1620	539
BLGT_RS10685		transposase	-300344	2.72389	3.46443		CDS	with_protein	GCF_000772485.1	Primary Assembly	chromosome		NZ_CP006741.1	2238597	2238917	+	WP_131215821.1	WP_131215821.1				321	106
BLGT_RS08160	BLGT_08350	peptide deformylase	-1062314	2.68238	2.53549		CDS	with_protein	GCF_000772485.1	Primary Assembly	chromosome		NZ_CP006741.1	1938573	1938992	-	WP_029679328.1	WP_029679328.1				420	139
BLGT_RS03560	BLGT_03645	bifunctional glutamate N-acetyltransferase/amino-acid acetyltransferase ArgJ	-800721	2.58596	4.98425		CDS	with_protein	GCF_000772485.1	Primary Assembly	chromosome		NZ_CP006741.1	876678	877853	+	WP_007053613.1	WP_007053613.1		argJ		1176	391
BLGT_RS00270	BLGT_00265	ParB/RepB/Spo0J family partition protein	1867513	2.55995	2.98194		CDS	with_protein	GCF_000772485.1	Primary Assembly	chromosome		NZ_CP006741.1	77132	78493	-	WP_038426223.1	WP_038426223.1				1362	453
BLGT_RS08200	BLGT_08390	sugar ABC transporter ATP-binding protein	-1068947	2.55406			CDS	with_protein	GCF_000772485.1	Primary Assembly	chromosome		NZ_CP006741.1	1946006	1946872	+	WP_012472194.1	WP_012472194.1				867	288
BLGT_RS03565	BLGT_03650	acetylglutamate kinase	-304695	2.5402	4.26963		CDS	with_protein	GCF_000772485.1	Primary Assembly	chromosome		NZ_CP006741.1	877925	878881	+	WP_032738942.1	WP_032738942.1		argB		957	318
BLGT_RS02365	BLGT_02415	multidrug efflux MFS transporter	306040	2.53945			CDS	with_protein	GCF_000772485.1	Primary Assembly	chromosome		NZ_CP006741.1	574186	575727	-	WP_080746411.1	WP_080746411.1				1542	513
BLGT_RS03585	BLGT_03670	argininosuccinate synthase	1376847	2.53783	2.50287		CDS	with_protein	GCF_000772485.1	Primary Assembly	chromosome		NZ_CP006741.1	881767	883005	+	WP_007053609.1	WP_007053609.1				1239	412
BLGT_RS09480	BLGT_09735	ABC transporter permease	-1121964	2.50958	2.24908		CDS	with_protein	GCF_000772485.1	Primary Assembly	chromosome		NZ_CP006741.1	2259852	2261258	+	WP_038426579.1	WP_038426579.1				1407	468
BLGT_RS04710	BLGT_04820	50S ribosomal protein L25/general stress protein Ctc	1103408	2.50949			CDS	with_protein	GCF_000772485.1	Primary Assembly	chromosome		NZ_CP006741.1	1139294	1139914	+	WP_007052163.1	WP_007052163.1				621	206
BLGT_RS09420	BLGT_09670	ABC transporter ATP-binding protein	-2180472	2.50462			CDS	with_protein	GCF_000772485.1	Primary Assembly	chromosome		NZ_CP006741.1	2243322	2244584	-	WP_052122993.1	WP_052122993.1				1263	420
BLGT_RS00225	BLGT_00220	16S rRNA (adenine(1518)-N(6)/adenine(1519)-N(6))-dimethyltransferase RsmA	1722983	2.43875	2.49201		CDS	with_protein	GCF_000772485.1	Primary Assembly	chromosome		NZ_CP006741.1	64112	65035	+	WP_013410509.1	WP_013410509.1		rsmA		924	307
BLGT_RS07515	BLGT_07710	HAMP domain-containing histidine kinase	-1727276	2.42811	3.02236		CDS	with_protein	GCF_000772485.1	Primary Assembly	chromosome		NZ_CP006741.1	1788018	1789868	-	WP_011067906.1	WP_011067906.1				1851	616
BLGT_RS00220	BLGT_00215	DUF348 domain-containing protein	2182483	2.38952	2.87372		CDS	with_protein	GCF_000772485.1	Primary Assembly	chromosome		NZ_CP006741.1	62592	64079	+	WP_038426218.1	WP_038426218.1				1488	495
BLGT_RS09435	BLGT_09685	glycosyltransferase	-2183212	2.38166			CDS	with_protein	GCF_000772485.1	Primary Assembly	chromosome		NZ_CP006741.1	2246562	2248244	-	WP_038426576.1	WP_038426576.1				1683	560
BLGT_RS00230	BLGT_00225	4-diphosphocytidyl-2C-methyl-D-erythritol kinase	2179647	2.37804	2.09584		CDS	with_protein	GCF_000772485.1	Primary Assembly	chromosome		NZ_CP006741.1	65032	65982	+	WP_038426219.1	WP_038426219.1				951	316
BLGT_RS09430	BLGT_09680	glycosyltransferase	-2193677	2.34125			CDS	with_protein	GCF_000772485.1	Primary Assembly	chromosome		NZ_CP006741.1	2245629	2246558	-	WP_014485271.1	WP_014485271.1				930	309
BLGT_RS00165	BLGT_00165	class Ib ribonucleoside-diphosphate reductase assembly flavoprotein NrdI	1883239	2.34111	2.80761		CDS	with_protein	GCF_000772485.1	Primary Assembly	chromosome		NZ_CP006741.1	52881	53288	-	WP_011068609.1	WP_011068609.1		nrdI		408	135
BLGT_RS08150		permease	-1191122	2.30774	3.01045		CDS	without_protein	GCF_000772485.1	Primary Assembly	chromosome		NZ_CP006741.1	1936527	1936830	+						304		pseudo
BLGT_RS02995	BLGT_03070	ABC transporter permease	-397152	2.30686	2.41969		CDS	with_protein	GCF_000772485.1	Primary Assembly	chromosome		NZ_CP006741.1	745708	746685	+	WP_008783137.1	WP_008783137.1				978	325
BLGT_RS01365	BLGT_01385	30S ribosomal protein S18	1483101	2.30288			CDS	with_protein	GCF_000772485.1	Primary Assembly	chromosome		NZ_CP006741.1	349533	349781	+	WP_007051545.1	WP_007051545.1		rpsR		249	82
BLGT_RS10320		hypothetical protein	-675273	2.28654			CDS	without_protein	GCF_000772485.1	Primary Assembly	chromosome		NZ_CP006741.1	1832882	1833484	+						603		pseudo
BLGT_RS04790	BLGT_04920	glutamate synthase large subunit	-1109446	2.28542	2.84855		CDS	with_protein	GCF_000772485.1	Primary Assembly	chromosome		NZ_CP006741.1	1158211	1162782	+	WP_038426387.1	WP_038426387.1		gltB		4572	1523
BLGT_RS00170	BLGT_00170	glutaredoxin family protein	1654648	2.27377	2.67649		CDS	with_protein	GCF_000772485.1	Primary Assembly	chromosome		NZ_CP006741.1	53336	53650	-	WP_007054638.1	WP_007054638.1				315	104
BLGT_RS07190	BLGT_07390	transcription antitermination factor NusB	-961289	2.26965	2.20617		CDS	with_protein	GCF_000772485.1	Primary Assembly	chromosome		NZ_CP006741.1	1708298	1708870	-	WP_007053263.1	WP_007053263.1		nusB		573	190
BLGT_RS03005	BLGT_03080	ABC transporter ATP-binding protein	-296937	2.2689			CDS	with_protein	GCF_000772485.1	Primary Assembly	chromosome		NZ_CP006741.1	747581	748372	+	WP_013582427.1	WP_013582427.1				792	263
BLGT_RS01870	BLGT_01915	C1 family peptidase	414954	2.25577	2.50838		CDS	with_protein	GCF_000772485.1	Primary Assembly	chromosome		NZ_CP006741.1	451435	452778	+	WP_007055726.1	WP_007055726.1				1344	447
BLGT_RS03525	BLGT_03610	ABC transporter ATP-binding protein	-519334	2.25051	2.74566		CDS	with_protein	GCF_000772485.1	Primary Assembly	chromosome		NZ_CP006741.1	867732	869135	+	WP_074709801.1	WP_074709801.1				1404	467
BLGT_RS01370	BLGT_01390	50S ribosomal protein L9	927603	2.24141			CDS	with_protein	GCF_000772485.1	Primary Assembly	chromosome		NZ_CP006741.1	349801	350247	+	WP_007051544.1	WP_007051544.1		rplI		447	148
BLGT_RS05375	BLGT_05515	threonine--tRNA ligase	-533201	2.23364			CDS	with_protein	GCF_000772485.1	Primary Assembly	chromosome		NZ_CP006741.1	1277850	1279883	-	WP_007054284.1	WP_007054284.1				2034	677
BLGT_RS03000	BLGT_03075	ABC transporter permease	-426928	2.21494			CDS	with_protein	GCF_000772485.1	Primary Assembly	chromosome		NZ_CP006741.1	746682	747584	+	WP_007057803.1	WP_007057803.1				903	300
BLGT_RS01270	BLGT_01290	MATE family efflux transporter	-43372	2.17448	2.20565		CDS	with_protein	GCF_000772485.1	Primary Assembly	chromosome		NZ_CP006741.1	320656	322251	-	WP_011068485.1	WP_011068485.1				1596	531
BLGT_RS01110	BLGT_01130	glutamate--tRNA ligase	467966	2.15579			CDS	with_protein	GCF_000772485.1	Primary Assembly	chromosome		NZ_CP006741.1	278879	280399	+	WP_007051591.1	WP_007051591.1				1521	506
BLGT_RS03010	BLGT_03085	ABC transporter ATP-binding protein	1054963	2.15203			CDS	with_protein	GCF_000772485.1	Primary Assembly	chromosome		NZ_CP006741.1	748365	749150	+	WP_008783136.1	WP_008783136.1				786	261
BLGT_RS07605	BLGT_07800	ECF transporter S component	475510	2.1324	3.17155		CDS	with_protein	GCF_000772485.1	Primary Assembly	chromosome		NZ_CP006741.1	1804113	1804754	-	WP_007053173.1	WP_007053173.1				642	213
BLGT_RS09545	BLGT_09800	aminopeptidase	-632476	2.12601	2.02418		CDS	with_protein	GCF_000772485.1	Primary Assembly	chromosome		NZ_CP006741.1	2280264	2281790	+	WP_038426582.1	WP_038426582.1				1527	508
BLGT_RS06930	BLGT_07120	tRNA dihydrouridine synthase DusB	-1369534	2.1244			CDS	with_protein	GCF_000772485.1	Primary Assembly	chromosome		NZ_CP006741.1	1649314	1650558	-	WP_007056907.1	WP_007056907.1		dusB		1245	414
BLGT_RS01115	BLGT_01135	tRNA-Glu	588036	2.10182			tRNA		GCF_000772485.1	Primary Assembly	chromosome		NZ_CP006741.1	281024	281096	+						73		anticodon=CTC
BLGT_RS03530	BLGT_03615	energy-coupling factor transporter transmembrane protein EcfT	-752127	2.09943	2.19566		CDS	with_protein	GCF_000772485.1	Primary Assembly	chromosome		NZ_CP006741.1	869132	869959	+	WP_007053619.1	WP_007053619.1				828	275
BLGT_RS00455	BLGT_00455	DNA-binding protein	1156838	2.09081	3.41781		CDS	with_protein	GCF_000772485.1	Primary Assembly	chromosome		NZ_CP006741.1	117832	119481	+	WP_050540800.1	WP_050540800.1				1650	549
BLGT_RS05365	BLGT_05505	YebC/PmpR family DNA-binding transcriptional regulator	-928258	2.0723			CDS	with_protein	GCF_000772485.1	Primary Assembly	chromosome		NZ_CP006741.1	1276319	1277074	-	WP_038426418.1	WP_038426418.1				756	251
BLGT_RS01360	BLGT_01380	single-stranded DNA-binding protein	17654	2.06477			CDS	with_protein	GCF_000772485.1	Primary Assembly	chromosome		NZ_CP006741.1	348816	349472	+	WP_007057715.1	WP_007057715.1		ssb		657	218
BLGT_RS01450	BLGT_01470	NAD(P)/FAD-dependent oxidoreductase	-290246	2.05854			CDS	with_protein	GCF_000772485.1	Primary Assembly	chromosome		NZ_CP006741.1	367126	368739	+	WP_007051527.1	WP_007051527.1				1614	537
BLGT_RS00275	BLGT_00270	ParA family protein	2157536	2.05515	2.47571		CDS	with_protein	GCF_000772485.1	Primary Assembly	chromosome		NZ_CP006741.1	78493	79503	-	WP_077321671.1	WP_077321671.1				1011	336
BLGT_RS09395	BLGT_09640	UDP-galactopyranose mutase	-1301182	2.05295			CDS	with_protein	GCF_000772485.1	Primary Assembly	chromosome		NZ_CP006741.1	2237039	2238235	-	WP_038426575.1	WP_038426575.1		glf		1197	398
BLGT_RS10075		LCP family protein	1110463	2.05117	2.26849		CDS	with_protein	GCF_000772485.1	Primary Assembly	chromosome		NZ_CP006741.1	937053	938486	-	WP_021975633.1	WP_021975633.1				1434	477
BLGT_RS08625	BLGT_08840	50S ribosomal protein L17	195108	2.04281			CDS	with_protein	GCF_000772485.1	Primary Assembly	chromosome		NZ_CP006741.1	2048949	2049491	-	WP_007053049.1	WP_007053049.1		rplQ		543	180
BLGT_RS09425	BLGT_09675	ABC transporter permease	-1106442	2.0349			CDS	with_protein	GCF_000772485.1	Primary Assembly	chromosome		NZ_CP006741.1	2244599	2245444	-	WP_014485272.1	WP_014485272.1				846	281
BLGT_RS10115		hypothetical protein	-365231	2.02783			CDS	with_protein	GCF_000772485.1	Primary Assembly	chromosome		NZ_CP006741.1	1139002	1139310	+	WP_077322021.1	WP_077322021.1				309	102
BLGT_RS03110	BLGT_03185	anion transporter	-425972	2.02339			CDS	without_protein	GCF_000772485.1	Primary Assembly	chromosome		NZ_CP006741.1	774079	774441	+						363		partial;pseudo
BLGT_RS01355	BLGT_01375	30S ribosomal protein S6	906012	2.01661			CDS	with_protein	GCF_000772485.1	Primary Assembly	chromosome		NZ_CP006741.1	348469	348759	+	WP_003828111.1	WP_003828111.1		rpsF		291	96
BLGT_RS05265	BLGT_05410	hypothetical protein	-290882	2.01649	3.78254		CDS	with_protein	GCF_000772485.1	Primary Assembly	chromosome		NZ_CP006741.1	1254771	1255025	-	WP_007052874.1	WP_007052874.1				255	84
BLGT_RS03950	BLGT_04030	tRNA-Leu	-607813	2.00679			tRNA		GCF_000772485.1	Primary Assembly	chromosome		NZ_CP006741.1	964143	964216	+						74		anticodon=CAA
BLGT_RS01400	BLGT_01420	metal-sensitive transcriptional regulator	1113059	-2.00177			CDS	with_protein	GCF_000772485.1	Primary Assembly	chromosome		NZ_CP006741.1	356403	356684	+	WP_007051538.1	WP_007051538.1				282	93
BLGT_RS06245	BLGT_06415	DUF5067 domain-containing protein	-776117	-2.00585			CDS	with_protein	GCF_000772485.1	Primary Assembly	chromosome		NZ_CP006741.1	1469743	1470588	-	WP_007057205.1	WP_007057205.1				846	281
BLGT_RS02825	BLGT_02890	nuclease	1078206	-2.02066	-2.54049		CDS	with_protein	GCF_000772485.1	Primary Assembly	chromosome		NZ_CP006741.1	694471	698766	+	WP_038426326.1	WP_038426326.1				4296	1431
BLGT_RS07475	BLGT_07665	creatininase	-920302	-2.02212			CDS	with_protein	GCF_000772485.1	Primary Assembly	chromosome		NZ_CP006741.1	1776972	1777730	-	WP_007053201.1	WP_007053201.1				759	252
BLGT_RS03475	BLGT_03560	sugar O-acetyltransferase	-1528	-2.02966	-2.89354		CDS	with_protein	GCF_000772485.1	Primary Assembly	chromosome		NZ_CP006741.1	857428	858102	+	WP_007053629.1	WP_007053629.1				675	224
BLGT_RS03470	BLGT_03555	DNA lyase	290159	-2.03251	-3.56108		CDS	with_protein	GCF_000772485.1	Primary Assembly	chromosome		NZ_CP006741.1	856574	857266	+	WP_032685073.1	WP_032685073.1				693	230
BLGT_RS04745	BLGT_04855	LacI family transcriptional regulator	543761	-2.03779			CDS	with_protein	GCF_000772485.1	Primary Assembly	chromosome		NZ_CP006741.1	1147425	1148525	-	WP_015713551.1	WP_015713551.1				1101	366
BLGT_RS10290		Rrf2 family transcriptional regulator	-933	-2.04353			CDS	without_protein	GCF_000772485.1	Primary Assembly	chromosome		NZ_CP006741.1	1692286	1692656	+						371		pseudo
BLGT_RS07110	BLGT_07310	ABC transporter	-306542	-2.04428			CDS	with_protein	GCF_000772485.1	Primary Assembly	chromosome		NZ_CP006741.1	1691723	1692046	-	WP_007054036.1	WP_007054036.1				324	107
BLGT_RS05880	BLGT_06035	plasmid mobilization relaxosome protein MobC	426255	-2.04806			CDS	with_protein	GCF_000772485.1	Primary Assembly	chromosome		NZ_CP006741.1	1385504	1385947	-	WP_007052708.1	WP_007052708.1		mobC		444	147
BLGT_RS07640	BLGT_07835	proteasome accessory factor PafA2	-337526	-2.05716			CDS	with_protein	GCF_000772485.1	Primary Assembly	chromosome		NZ_CP006741.1	1812202	1813869	-	WP_007053166.1	WP_007053166.1				1668	555
BLGT_RS06275	BLGT_06445	damage-inducible protein J	266174	-2.06356			CDS	with_protein	GCF_000772485.1	Primary Assembly	chromosome		NZ_CP006741.1	1476343	1476705	-	WP_038426456.1	WP_038426456.1				363	120
BLGT_RS07340	BLGT_07535	TM2 domain-containing protein	228756	-2.06848			CDS	with_protein	GCF_000772485.1	Primary Assembly	chromosome		NZ_CP006741.1	1742879	1743529	+	WP_080746428.1	WP_080746428.1				651	216
BLGT_RS08315	BLGT_08510	UDP-glucose 4-epimerase GalE	-1128829	-2.06855	-3.90849		CDS	with_protein	GCF_000772485.1	Primary Assembly	chromosome		NZ_CP006741.1	1972285	1973298	-	WP_007052365.1	WP_007052365.1		galE		1014	337
BLGT_RS03410	BLGT_03495	LysR family transcriptional regulator	9921	-2.06891			CDS	with_protein	GCF_000772485.1	Primary Assembly	chromosome		NZ_CP006741.1	844469	845287	+	WP_038426347.1	WP_038426347.1				819	272
BLGT_RS03465	BLGT_03550	MATE family efflux transporter	46199	-2.08283	-3.99224		CDS	with_protein	GCF_000772485.1	Primary Assembly	chromosome		NZ_CP006741.1	855208	856566	+	WP_007056328.1	WP_007056328.1				1359	452
BLGT_RS03685	BLGT_03775	ABC-2 transporter permease	-320186	-2.08895			CDS	with_protein	GCF_000772485.1	Primary Assembly	chromosome		NZ_CP006741.1	902765	903460	+	WP_080575048.1	WP_080575048.1				696	231
BLGT_RS02405	BLGT_02460	IS21 family transposase	502517	-2.09422			CDS	with_protein	GCF_000772485.1	Primary Assembly	chromosome		NZ_CP006741.1	583274	584776	-	WP_038426305.1	WP_038426305.1				1503	500
BLGT_RS10100		hypothetical protein	228158	-2.09472			CDS	with_protein	GCF_000772485.1	Primary Assembly	chromosome		NZ_CP006741.1	1087293	1087481	+	WP_007055493.1	WP_007055493.1				189	62
BLGT_RS05530	BLGT_05670	MptD family putative ECF transporter S component	283179	-2.1142	-3.26855		CDS	with_protein	GCF_000772485.1	Primary Assembly	chromosome		NZ_CP006741.1	1315639	1316286	+	WP_007052771.1	WP_007052771.1				648	215
BLGT_RS06735	BLGT_06930	LysM peptidoglycan-binding domain-containing protein	-1500697	-2.12936			CDS	with_protein	GCF_000772485.1	Primary Assembly	chromosome		NZ_CP006741.1	1599465	1599815	-	WP_032682533.1	WP_032682533.1				351	116
BLGT_RS00360	BLGT_00350	Lrp/AsnC family transcriptional regulator	479761	-2.1301			CDS	with_protein	GCF_000772485.1	Primary Assembly	chromosome		NZ_CP006741.1	99118	99552	-	WP_007051756.1	WP_007051756.1				435	144
BLGT_RS02385		hypothetical protein	664378	-2.14866	-4.14341		CDS	with_protein	GCF_000772485.1	Primary Assembly	chromosome		NZ_CP006741.1	579313	579798	-	WP_158332785.1	WP_158332785.1				486	161
BLGT_RS05200	BLGT_05345	bifunctional indole-3-glycerol phosphate synthase/tryptophan synthase subunit beta	-164289	-2.14889			CDS	with_protein	GCF_000772485.1	Primary Assembly	chromosome		NZ_CP006741.1	1244176	1246263	+	WP_011068116.1	WP_011068116.1				2088	695
BLGT_RS04455	BLGT_04560	ABC transporter ATP-binding protein	-239449	-2.15755			CDS	with_protein	GCF_000772485.1	Primary Assembly	chromosome		NZ_CP006741.1	1081974	1083050	+	WP_077382441.1	WP_077382441.1				1077	358
BLGT_RS03405	BLGT_03490	DUF4391 domain-containing protein	1229705	-2.15819			CDS	with_protein	GCF_000772485.1	Primary Assembly	chromosome		NZ_CP006741.1	843601	844332	+	WP_007058489.1	WP_007058489.1				732	243
BLGT_RS08800	BLGT_09020	VOC family protein	-1496334	-2.1596	-4.15784		CDS	with_protein	GCF_000772485.1	Primary Assembly	chromosome		NZ_CP006741.1	2074037	2074441	-	WP_014485325.1	WP_014485325.1				405	134
BLGT_RS02380	BLGT_02430	ISL3 family transposase	27569	-2.16173	-2.8097		CDS	without_protein	GCF_000772485.1	Primary Assembly	chromosome		NZ_CP006741.1	578107	579312	+						1206		pseudo
BLGT_RS02520		lipoate--protein ligase family protein	19784	-2.16551			CDS	with_protein	GCF_000772485.1	Primary Assembly	chromosome		NZ_CP006741.1	606881	607966	+	WP_007055177.1	WP_007055177.1				1086	361
BLGT_RS02595	BLGT_02660	ACT domain-containing protein	706774	-2.18926	-3.34092		CDS	with_protein	GCF_000772485.1	Primary Assembly	chromosome		NZ_CP006741.1	627750	628022	+	WP_007055170.1	WP_007055170.1				273	90
BLGT_RS05630		hypothetical protein	870451	-2.18952	-3.44651		CDS	with_protein	GCF_000772485.1	Primary Assembly	chromosome		NZ_CP006741.1	1334796	1335134	-	WP_014485614.1	WP_014485614.1				339	112
BLGT_RS09280	BLGT_09515	FAD-dependent oxidoreductase	-1321454	-2.20478			CDS	with_protein	GCF_000772485.1	Primary Assembly	chromosome		NZ_CP006741.1	2205585	2206931	+	WP_007053081.1	WP_007053081.1				1347	448
BLGT_RS03600	BLGT_03685	thiazole synthase	1300083	-2.20768			CDS	with_protein	GCF_000772485.1	Primary Assembly	chromosome		NZ_CP006741.1	885477	886346	+	WP_003828815.1	WP_003828815.1				870	289
BLGT_RS09210	BLGT_09440	AEC family transporter	-1851378	-2.22988	-2.12488		CDS	with_protein	GCF_000772485.1	Primary Assembly	chromosome		NZ_CP006741.1	2186429	2187373	+	WP_007053065.1	WP_007053065.1				945	314
BLGT_RS01330	BLGT_01350	hypothetical protein	-171869	-2.23593	-2.64868		CDS	with_protein	GCF_000772485.1	Primary Assembly	chromosome		NZ_CP006741.1	335995	341826	+	WP_038426260.1	WP_038426260.1				5832	1943
BLGT_RS00665	BLGT_00665	glycosyltransferase family 2 protein	288271	-2.25004	-3.54771		CDS	with_protein	GCF_000772485.1	Primary Assembly	chromosome		NZ_CP006741.1	169957	170865	+	WP_007056817.1	WP_007056817.1				909	302
BLGT_RS01900	BLGT_01950	phosphate ABC transporter substrate-binding protein PstS	1118893	-2.25347	-2.18473		CDS	with_protein	GCF_000772485.1	Primary Assembly	chromosome		NZ_CP006741.1	459136	460269	+	WP_007051436.1	WP_007051436.1		pstS		1134	377
BLGT_RS06655	BLGT_06850	macro domain-containing protein	275826	-2.25794			CDS	with_protein	GCF_000772485.1	Primary Assembly	chromosome		NZ_CP006741.1	1579162	1580265	-	WP_038426467.1	WP_038426467.1				1104	367
BLGT_RS07820		hypothetical protein	-214210	-2.29728	-2.93633		CDS	with_protein	GCF_000772485.1	Primary Assembly	chromosome		NZ_CP006741.1	1856091	1856375	-	WP_074709579.1	WP_074709579.1				285	94
BLGT_RS06890	BLGT_07080	YihY/virulence factor BrkB family protein	-1082507	-2.29744			CDS	with_protein	GCF_000772485.1	Primary Assembly	chromosome		NZ_CP006741.1	1642165	1643031	-	WP_074710155.1	WP_074710155.1				867	288
BLGT_RS02315	BLGT_02370	sugar ABC transporter permease	730978	-2.30318	-3.60065		CDS	with_protein	GCF_000772485.1	Primary Assembly	chromosome		NZ_CP006741.1	560524	561486	+	WP_007055699.1	WP_007055699.1				963	320
BLGT_RS05450		aminotransferase class I/II-fold pyridoxal phosphate-dependent enzyme	596067	-2.34212			CDS	with_protein	GCF_000772485.1	Primary Assembly	chromosome		NZ_CP006741.1	1292464	1294008	-	WP_080746421.1	WP_080746421.1				1545	514
BLGT_RS07945	BLGT_08135	citrate synthase	-1178626	-2.361	-2.30139		CDS	with_protein	GCF_000772485.1	Primary Assembly	chromosome		NZ_CP006741.1	1890075	1891367	-	WP_007053894.1	WP_007053894.1				1293	430
BLGT_RS10040		hypothetical protein	144934	-2.3634	-3.14489		CDS	with_protein	GCF_000772485.1	Primary Assembly	chromosome		NZ_CP006741.1	712741	713178	+	WP_011068340.1	WP_011068340.1				438	145
BLGT_RS03480	BLGT_03565	nodulation protein L	55900	-2.38864	-4.34014		CDS	with_protein	GCF_000772485.1	Primary Assembly	chromosome		NZ_CP006741.1	858112	858327	-	WP_077321793.1	WP_077321793.1				216	71
BLGT_RS03735	BLGT_03820	UPF0182 family protein	145000	-2.38893	-4.32438		CDS	with_protein	GCF_000772485.1	Primary Assembly	chromosome		NZ_CP006741.1	914227	917466	+	WP_007055105.1	WP_007055105.1				3240	1079
BLGT_RS04370	BLGT_04465	hypothetical protein	-961794	-2.40477	-3.37445		CDS	with_protein	GCF_000772485.1	Primary Assembly	chromosome		NZ_CP006741.1	1062466	1063137	-	WP_077322004.1	WP_077322004.1				672	223
BLGT_RS09830		zinc ribbon domain-containing protein	609309	-2.41184	-3.8575		CDS	with_protein	GCF_000772485.1	Primary Assembly	chromosome		NZ_CP006741.1	101343	101939	+	WP_011068590.1	WP_011068590.1				597	198
BLGT_RS02860	BLGT_02925	sulfite exporter TauE/SafE family protein	173127	-2.41653	-4.33762		CDS	with_protein	GCF_000772485.1	Primary Assembly	chromosome		NZ_CP006741.1	711248	712144	+	WP_007056429.1	WP_007056429.1				897	298
BLGT_RS03595	BLGT_03680	sulfur carrier protein ThiS	796447	-2.45077	-2.73188		CDS	with_protein	GCF_000772485.1	Primary Assembly	chromosome		NZ_CP006741.1	885271	885465	+	WP_007051161.1	WP_007051161.1		thiS		195	64
BLGT_RS07060	BLGT_07260	ATP-dependent helicase	-1350987	-2.45231			CDS	with_protein	GCF_000772485.1	Primary Assembly	chromosome		NZ_CP006741.1	1681912	1683486	-	WP_038426476.1	WP_038426476.1				1575	524
BLGT_RS01320	BLGT_01340	carbohydrate ABC transporter permease	434067	-2.45815	-2.87104		CDS	with_protein	GCF_000772485.1	Primary Assembly	chromosome		NZ_CP006741.1	332499	333317	+	WP_007051554.1	WP_007051554.1				819	272
BLGT_RS03085	BLGT_03160	pyridoxal 5'-phosphate synthase lyase subunit PdxS	-637319	-2.47798	-2.98476		CDS	with_protein	GCF_000772485.1	Primary Assembly	chromosome		NZ_CP006741.1	767384	768259	+	WP_007053677.1	WP_007053677.1		pdxS		876	291
BLGT_RS00495	BLGT_00495	amidohydrolase family protein	1780718	-2.47923			CDS	with_protein	GCF_000772485.1	Primary Assembly	chromosome		NZ_CP006741.1	130940	132559	+	WP_038426233.1	WP_038426233.1				1620	539
BLGT_RS08045	BLGT_08230	ABC transporter substrate-binding protein	-623238	-2.50135	-2.53686		CDS	with_protein	GCF_000772485.1	Primary Assembly	chromosome		NZ_CP006741.1	1913277	1914464	-	WP_038426522.1	WP_038426522.1				1188	395
BLGT_RS05445	BLGT_05585	hypothetical protein	-455143	-2.50409			CDS	with_protein	GCF_000772485.1	Primary Assembly	chromosome		NZ_CP006741.1	1291226	1292335	+	WP_038426419.1	WP_038426419.1				1110	369
BLGT_RS03380	BLGT_03465	bile acid:sodium symporter family protein	277934	-2.54355			CDS	with_protein	GCF_000772485.1	Primary Assembly	chromosome		NZ_CP006741.1	837192	838253	+	WP_007056371.1	WP_007056371.1				1062	353
BLGT_RS04605	BLGT_04715	L,D-transpeptidase family protein	-92535	-2.54755	-4.86439		CDS	with_protein	GCF_000772485.1	Primary Assembly	chromosome		NZ_CP006741.1	1116187	1117782	+	WP_013582530.1	WP_013582530.1				1596	531
BLGT_RS04225	BLGT_04320	Na+/H+ antiporter NhaA	-132255	-2.54791	-3.70521		CDS	with_protein	GCF_000772485.1	Primary Assembly	chromosome		NZ_CP006741.1	1025247	1026665	+	WP_038426363.1	WP_038426363.1				1419	472
BLGT_RS03645	BLGT_03735	hypothetical protein	-272305	-2.62136			CDS	with_protein	GCF_000772485.1	Primary Assembly	chromosome		NZ_CP006741.1	894410	895084	-	WP_007053602.1	WP_007053602.1				675	224
BLGT_RS02575	BLGT_02640	carbohydrate ABC transporter permease	1236009	-2.63486	-4.31363		CDS	with_protein	GCF_000772485.1	Primary Assembly	chromosome		NZ_CP006741.1	622779	623714	+	WP_007055199.1	WP_007055199.1				936	311
BLGT_RS07835	BLGT_08025	gamma-glutamylcysteine synthetase	-1761242	-2.65501	-2.59517		CDS	with_protein	GCF_000772485.1	Primary Assembly	chromosome		NZ_CP006741.1	1859723	1861000	-	WP_038426515.1	WP_038426515.1				1278	425
BLGT_RS00365	BLGT_00355	pyridoxal phosphate-dependent aminotransferase	89126	-2.65707	-4.71794		CDS	with_protein	GCF_000772485.1	Primary Assembly	chromosome		NZ_CP006741.1	99758	101092	+	WP_007056527.1	WP_007056527.1				1335	444
BLGT_RS09885		CrcB family protein	1503453	-2.6612			CDS	with_protein	GCF_000772485.1	Primary Assembly	chromosome		NZ_CP006741.1	190218	191285	+	WP_080746333.1	WP_080746333.1				1068	355
BLGT_RS07135	BLGT_07335	transporter substrate-binding domain-containing protein	-1682526	-2.6928	-4.46445		CDS	with_protein	GCF_000772485.1	Primary Assembly	chromosome		NZ_CP006741.1	1694738	1695640	-	WP_007054029.1	WP_007054029.1				903	300
BLGT_RS00050	BLGT_00045	extracellular solute-binding protein	1868182	-2.7027	-2.09043		CDS	with_protein	GCF_000772485.1	Primary Assembly	chromosome		NZ_CP006741.1	13114	14403	-	WP_011068626.1	WP_011068626.1				1290	429
BLGT_RS07925	BLGT_08115	hypothetical protein	-341261	-2.73806			CDS	with_protein	GCF_000772485.1	Primary Assembly	chromosome		NZ_CP006741.1	1882585	1883073	-	WP_007052466.1	WP_007052466.1				489	162
BLGT_RS06530	BLGT_06715	ABC transporter ATP-binding protein	-937729	-2.74035			CDS	with_protein	GCF_000772485.1	Primary Assembly	chromosome		NZ_CP006741.1	1541812	1543521	-	WP_007052568.1	WP_007052568.1				1710	569
BLGT_RS02515	BLGT_02570	3-isopropylmalate dehydrogenase	161522	-2.76694	-2.48696		CDS	with_protein	GCF_000772485.1	Primary Assembly	chromosome		NZ_CP006741.1	605792	606823	+	WP_007051335.1	WP_007051335.1				1032	343
BLGT_RS03090	BLGT_03165	pyridoxal 5'-phosphate synthase glutaminase subunit PdxT	809349	-2.77905	-2.92047		CDS	with_protein	GCF_000772485.1	Primary Assembly	chromosome		NZ_CP006741.1	768345	768983	+	WP_038426339.1	WP_038426339.1		pdxT		639	212
BLGT_RS06650	BLGT_06845	VWA domain-containing protein	116688	-2.78129			CDS	with_protein	GCF_000772485.1	Primary Assembly	chromosome		NZ_CP006741.1	1578332	1579018	-	WP_007052555.1	WP_007052555.1				687	228
BLGT_RS07140	BLGT_07340	amino acid ABC transporter ATP-binding protein	245238	-2.80257	-5.11495		CDS	with_protein	GCF_000772485.1	Primary Assembly	chromosome		NZ_CP006741.1	1695706	1696497	-	WP_007054028.1	WP_007054028.1				792	263
BLGT_RS08185	BLGT_08375	sugar ABC transporter ATP-binding protein	87428	-2.84772	-2.71178		CDS	with_protein	GCF_000772485.1	Primary Assembly	chromosome		NZ_CP006741.1	1941735	1943288	-	WP_007053866.1	WP_007053866.1				1554	517
BLGT_RS08560	BLGT_08770	DNA repair protein RadA	-1145831	-2.92774	-3.63459		CDS	with_protein	GCF_000772485.1	Primary Assembly	chromosome		NZ_CP006741.1	2030716	2032254	+	WP_007055359.1	WP_007055359.1		radA		1539	512
BLGT_RS03605	BLGT_03690	thiazole biosynthesis adenylyltransferase ThiF	-101679	-2.93225	-2.23096		CDS	with_protein	GCF_000772485.1	Primary Assembly	chromosome		NZ_CP006741.1	886423	887232	+	WP_007056327.1	WP_007056327.1		thiF		810	269
BLGT_RS03170	BLGT_03250	ATP-binding protein	-495615	-2.94912	-4.77451		CDS	with_protein	GCF_000772485.1	Primary Assembly	chromosome		NZ_CP006741.1	785553	786116	-	WP_007056433.1	WP_007056433.1				564	187
BLGT_RS01155	BLGT_01175	iron permease	594977	-2.97061	-4.09637		CDS	with_protein	GCF_000772485.1	Primary Assembly	chromosome		NZ_CP006741.1	290501	292312	+	WP_032735676.1	WP_032735676.1				1812	603
BLGT_RS03610		rhodanese-like domain-containing protein	859822	-3.04308	-2.87061		CDS	with_protein	GCF_000772485.1	Primary Assembly	chromosome		NZ_CP006741.1	887289	887645	+	WP_007051158.1	WP_007051158.1				357	118
BLGT_RS07360	BLGT_07555	sugar ABC transporter permease	-3	-3.04973	-2.2915		CDS	with_protein	GCF_000772485.1	Primary Assembly	chromosome		NZ_CP006741.1	1747467	1748489	-	WP_007053225.1	WP_007053225.1				1023	340
BLGT_RS07365	BLGT_07560	ABC transporter permease	-1418004	-3.08873	-2.28011		CDS	with_protein	GCF_000772485.1	Primary Assembly	chromosome		NZ_CP006741.1	1748486	1749556	-	WP_007053224.1	WP_007053224.1				1071	356
BLGT_RS01315	BLGT_01335	sugar ABC transporter permease	1677232	-3.08978	-2.9477		CDS	with_protein	GCF_000772485.1	Primary Assembly	chromosome		NZ_CP006741.1	331552	332478	+	WP_007054735.1	WP_007054735.1				927	308
BLGT_RS08485	BLGT_08680	sugar ABC transporter permease	-1984754	-3.09365	-2.12636		CDS	with_protein	GCF_000772485.1	Primary Assembly	chromosome		NZ_CP006741.1	2009710	2010681	-	WP_007053828.1	WP_007053828.1				972	323
BLGT_RS00095	BLGT_00090	cation-translocating P-type ATPase	1119708	-3.09673			CDS	with_protein	GCF_000772485.1	Primary Assembly	chromosome		NZ_CP006741.1	25927	28914	-	WP_007054625.1	WP_007054625.1				2988	995
BLGT_RS04750	BLGT_04860	glycerate kinase	548856	-3.11696	-2.07749		CDS	with_protein	GCF_000772485.1	Primary Assembly	chromosome		NZ_CP006741.1	1148622	1149842	+	WP_080746355.1	WP_080746355.1				1221	406
BLGT_RS07160	BLGT_07360	TetM/TetW/TetO/TetS family tetracycline resistance ribosomal protection protein	-1371014	-3.15388	-2.20462		CDS	with_protein	GCF_000772485.1	Primary Assembly	chromosome		NZ_CP006741.1	1698698	1700953	-	WP_038426482.1	WP_038426482.1				2256	751
BLGT_RS01310	BLGT_01330	sugar ABC transporter substrate-binding protein	1679611	-3.20023	-2.32552		CDS	with_protein	GCF_000772485.1	Primary Assembly	chromosome		NZ_CP006741.1	329939	331264	+	WP_007051556.1	WP_007051556.1				1326	441
BLGT_RS08490	BLGT_08685	extracellular solute-binding protein	-1219203	-3.23751	-2.17203		CDS	with_protein	GCF_000772485.1	Primary Assembly	chromosome		NZ_CP006741.1	2010875	2012191	-	WP_007055350.1	WP_007055350.1				1317	438
BLGT_RS03205	BLGT_03285	ABC transporter ATP-binding protein	902747	-3.27094	-5.0503		CDS	with_protein	GCF_000772485.1	Primary Assembly	chromosome		NZ_CP006741.1	792988	793743	+	WP_007051244.1	WP_007051244.1				756	251
BLGT_RS07145	BLGT_07345	amino acid ABC transporter permease	-478103	-3.28862	-4.85094		CDS	with_protein	GCF_000772485.1	Primary Assembly	chromosome		NZ_CP006741.1	1696490	1697164	-	WP_038426480.1	WP_038426480.1				675	224
BLGT_RS10165	BLGT_05180	membrane protein insertase YidC	-451036	-3.38162			CDS	with_protein	GCF_000772485.1	Primary Assembly	chromosome		NZ_CP006741.1	1219061	1220077	+	WP_007052250.1	WP_007052250.1		yidC		1017	338
BLGT_RS03095	BLGT_03170	aminotransferase class I/II-fold pyridoxal phosphate-dependent enzyme	1143775	-3.38373	-4.02596		CDS	with_protein	GCF_000772485.1	Primary Assembly	chromosome		NZ_CP006741.1	769041	770705	+	WP_007056415.1	WP_007056415.1				1665	554
BLGT_RS10330		hypothetical protein	-165104	-3.41536	-5.62805		CDS	with_protein	GCF_000772485.1	Primary Assembly	chromosome		NZ_CP006741.1	1914480	1914662	+	WP_074709587.1	WP_074709587.1				183	60
BLGT_RS07370	BLGT_07565	sugar ABC transporter ATP-binding protein	-1168580	-3.53074	-2.27375		CDS	with_protein	GCF_000772485.1	Primary Assembly	chromosome		NZ_CP006741.1	1749558	1751072	-	WP_015511961.1	WP_015511961.1				1515	504
BLGT_RS02400	BLGT_02455	ATP-binding protein	491747	-3.65609	-2.78853		CDS	with_protein	GCF_000772485.1	Primary Assembly	chromosome		NZ_CP006741.1	582492	583277	-	WP_007057038.1	WP_007057038.1				786	261
BLGT_RS04425	BLGT_04525	carbon starvation protein A	285444	-3.82861	-4.67807		CDS	with_protein	GCF_000772485.1	Primary Assembly	chromosome		NZ_CP006741.1	1075024	1077423	+	WP_038426374.1	WP_038426374.1				2400	799
BLGT_RS10630		hypothetical protein	-797506	-3.97161	-3.64521		CDS	with_protein	GCF_000772485.1	Primary Assembly	chromosome		NZ_CP006741.1	1362867	1363616	+	WP_157821810.1	WP_157821810.1				750	249
BLGT_RS02335	BLGT_02390	cellulase family glycosylhydrolase	-9847	-4.11084	-5.4072		CDS	with_protein	GCF_000772485.1	Primary Assembly	chromosome		NZ_CP006741.1	566110	568803	+	WP_032682606.1	WP_032682606.1				2694	897
BLGT_RS02310	BLGT_02365	sugar ABC transporter substrate-binding protein	1322956	-4.18368	-7.19963		CDS	with_protein	GCF_000772485.1	Primary Assembly	chromosome		NZ_CP006741.1	558956	560305	+	WP_007055690.1	WP_007055690.1				1350	449
BLGT_RS07930	BLGT_08120	helicase	-1466824	-4.41978	-4.13068		CDS	with_protein	GCF_000772485.1	Primary Assembly	chromosome		NZ_CP006741.1	1883261	1887445	-	WP_007058870.1	WP_007058870.1				4185	1394
BLGT_RS01725	BLGT_01770	endoribonuclease L-PSP	1466513	-4.68382	-5.59545		CDS	with_protein	GCF_000772485.1	Primary Assembly	chromosome		NZ_CP006741.1	420621	421010	+	WP_007055661.1	WP_007055661.1				390	129
BLGT_RS07935	BLGT_08125	WYL domain-containing transcriptional regulator	-732104	-4.84154	-7.75894		CDS	with_protein	GCF_000772485.1	Primary Assembly	chromosome		NZ_CP006741.1	1887523	1888608	+	WP_007052464.1	WP_007052464.1				1086	361
BLGT_RS04780	BLGT_04910	dihydrodipicolinate reductase	1139053	-4.85794	-6.09057		CDS	with_protein	GCF_000772485.1	Primary Assembly	chromosome		NZ_CP006741.1	1156504	1157529	+	WP_008783636.1	WP_008783636.1				1026	341
BLGT_RS09610	BLGT_09860	hypothetical protein	-421809	-4.9357	-3.12421		CDS	with_protein	GCF_000772485.1	Primary Assembly	chromosome		NZ_CP006741.1	2296582	2297145	+	WP_007055052.1	WP_007055052.1				564	187
BLGT_RS07880	BLGT_08070	nucleoside deoxyribosyltransferase	-1593528	-5.10651	-4.83501		CDS	with_protein	GCF_000772485.1	Primary Assembly	chromosome		NZ_CP006741.1	1875336	1875764	-	WP_007057152.1	WP_007057152.1				429	142
BLGT_RS01135	BLGT_01150	PEGA domain-containing protein	1655253	-5.25764	-6.4501		CDS	with_protein	GCF_000772485.1	Primary Assembly	chromosome		NZ_CP006741.1	282236	288136	+	WP_038426255.1	WP_038426255.1				5901	1966
BLGT_RS08190	BLGT_08380	sugar ABC transporter substrate-binding protein	375479	-5.35286	-6.97072		CDS	with_protein	GCF_000772485.1	Primary Assembly	chromosome		NZ_CP006741.1	1943389	1944546	-	WP_007052407.1	WP_007052407.1				1158	385
BLGT_RS09670	BLGT_09920	arabinosidase	-571981	-5.73892	-5.46931		CDS	with_protein	GCF_000772485.1	Primary Assembly	chromosome		NZ_CP006741.1	2320025	2323222	-	WP_038426590.1	WP_038426590.1				3198	1065
BLGT_RS07375	BLGT_07570	substrate-binding domain-containing protein	-594642	-5.7484	-3.38302		CDS	with_protein	GCF_000772485.1	Primary Assembly	chromosome		NZ_CP006741.1	1751241	1752224	-	WP_023658492.1	WP_023658492.1				984	327
BLGT_RS04785	BLGT_04915	substrate-binding domain-containing protein	-946437	-5.7703	-3.83521		CDS	without_protein	GCF_000772485.1	Primary Assembly	chromosome		NZ_CP006741.1	1157582	1157872	-						291		partial;pseudo
BLGT_RS00835	BLGT_00840	ketol-acid reductoisomerase	974503	-6.14063	-7.08975		CDS	with_protein	GCF_000772485.1	Primary Assembly	chromosome		NZ_CP006741.1	211435	212487	+	WP_007051650.1	WP_007051650.1		ilvC		1053	350
BLGT_RS04895	BLGT_05030	aldo/keto reductase	-283697		-3.17137		CDS	with_protein	GCF_000772485.1	Primary Assembly	chromosome		NZ_CP006741.1	1186990	1187949	+	WP_007054210.1	WP_007054210.1				960	319
BLGT_RS03695	BLGT_03785	calcium-translocating P-type ATPase, PMCA-type	870778		-3.06991		CDS	with_protein	GCF_000772485.1	Primary Assembly	chromosome		NZ_CP006741.1	904252	907038	-	WP_011068264.1	WP_011068264.1				2787	928
BLGT_RS07480	BLGT_07670	MFS transporter	-1527501		-3.00372		CDS	with_protein	GCF_000772485.1	Primary Assembly	chromosome		NZ_CP006741.1	1777816	1779192	-	WP_052122981.1	WP_052122981.1				1377	458
BLGT_RS01005	BLGT_01015	aspartate-semialdehyde dehydrogenase	1932332		-3.00196		CDS	with_protein	GCF_000772485.1	Primary Assembly	chromosome		NZ_CP006741.1	251691	252785	-	WP_007051614.1	WP_007051614.1		asd		1095	364
BLGT_RS09205	BLGT_09435	succinyl-diaminopimelate desuccinylase	-1367614		-2.93744		CDS	with_protein	GCF_000772485.1	Primary Assembly	chromosome		NZ_CP006741.1	2185117	2186391	-	WP_021975564.1	WP_021975564.1				1275	424
BLGT_RS03310	BLGT_03390	Y-family DNA polymerase	918373		-2.91136		CDS	with_protein	GCF_000772485.1	Primary Assembly	chromosome		NZ_CP006741.1	818777	820372	+	WP_010081087.1	WP_010081087.1				1596	531
BLGT_RS07320	BLGT_07515	ECF transporter S component	-141760		-2.87105		CDS	with_protein	GCF_000772485.1	Primary Assembly	chromosome		NZ_CP006741.1	1738745	1739398	+	WP_007053234.1	WP_007053234.1				654	217
BLGT_RS06725	BLGT_06920	phosphoglycerate dehydrogenase	-280243		-2.86881		CDS	with_protein	GCF_000772485.1	Primary Assembly	chromosome		NZ_CP006741.1	1597638	1598837	+	WP_007056381.1	WP_007056381.1		serA		1200	399
BLGT_RS05545	BLGT_05685	hypothetical protein	837799		-2.86402		CDS	with_protein	GCF_000772485.1	Primary Assembly	chromosome		NZ_CP006741.1	1318594	1319265	+	WP_007054306.1	WP_007054306.1				672	223
BLGT_RS09100	BLGT_09325	hypothetical protein	-56726		-2.82985		CDS	with_protein	GCF_000772485.1	Primary Assembly	chromosome		NZ_CP006741.1	2157064	2159109	+	WP_080746387.1	WP_080746387.1				2046	681
BLGT_RS08930	BLGT_09150	tRNA-Tyr	-371019		-2.77873		tRNA		GCF_000772485.1	Primary Assembly	chromosome		NZ_CP006741.1	2102383	2102464	-						82		anticodon=GTA
BLGT_RS07290	BLGT_07485	aryl-sulfate sulfotransferase	-682576		-2.73098		CDS	with_protein	GCF_000772485.1	Primary Assembly	chromosome		NZ_CP006741.1	1731445	1733214	+	WP_007055595.1	WP_007055595.1				1770	589
BLGT_RS04315	BLGT_04410	hypothetical protein	968118		-2.72775		CDS	with_protein	GCF_000772485.1	Primary Assembly	chromosome		NZ_CP006741.1	1050638	1051525	+	WP_014485724.1	WP_014485724.1				888	295
BLGT_RS08520	BLGT_08720	sugar porter family MFS transporter	-61830		-2.70627		CDS	with_protein	GCF_000772485.1	Primary Assembly	chromosome		NZ_CP006741.1	2019643	2021196	+	WP_007055366.1	WP_007055366.1				1554	517
BLGT_RS08260	BLGT_08455	D-alanyl-D-alanine carboxypeptidase/D-alanyl-D-alanine-endopeptidase	-1505169		-2.70175		CDS	with_protein	GCF_000772485.1	Primary Assembly	chromosome		NZ_CP006741.1	1959366	1960856	-	WP_032737510.1	WP_032737510.1		dacB		1491	496
BLGT_RS01885	BLGT_01930	5'-methylthioadenosine/S-adenosylhomocysteine nucleosidase	936449		-2.68537		CDS	with_protein	GCF_000772485.1	Primary Assembly	chromosome		NZ_CP006741.1	455687	456400	+	WP_007051439.1	WP_007051439.1		mtnN		714	237
BLGT_RS05925	BLGT_06080	antirestriction protein ArdA	694151		-2.65195		CDS	with_protein	GCF_000772485.1	Primary Assembly	chromosome		NZ_CP006741.1	1392849	1393934	+	WP_007054358.1	WP_007054358.1				1086	361
BLGT_RS08855	BLGT_09075	tRNA-Ser	-961384		-2.62912		tRNA		GCF_000772485.1	Primary Assembly	chromosome		NZ_CP006741.1	2088085	2088171	-						87		anticodon=GCT
BLGT_RS04655	BLGT_04765	16S rRNA (uracil(1498)-N(3))-methyltransferase	673810		-2.61185		CDS	with_protein	GCF_000772485.1	Primary Assembly	chromosome		NZ_CP006741.1	1126787	1127584	+	WP_007052153.1	WP_007052153.1				798	265
BLGT_RS07585		hypothetical protein	-981363		-2.60736		CDS	without_protein	GCF_000772485.1	Primary Assembly	chromosome		NZ_CP006741.1	1801394	1801732	+						339		partial;pseudo
BLGT_RS03315	BLGT_03395	hypothetical protein	-523392		-2.56856		CDS	with_protein	GCF_000772485.1	Primary Assembly	chromosome		NZ_CP006741.1	820369	820587	+	WP_007056345.1	WP_007056345.1				219	72
BLGT_RS01180	BLGT_01200	ABC transporter ATP-binding protein	943796		-2.55408		CDS	with_protein	GCF_000772485.1	Primary Assembly	chromosome		NZ_CP006741.1	297195	297992	+	WP_007051580.1	WP_007051580.1				798	265
BLGT_RS05185	BLGT_05330	amino acid permease	718205		-2.54887		CDS	without_protein	GCF_000772485.1	Primary Assembly	chromosome		NZ_CP006741.1	1241788	1242674	-						887		pseudo
BLGT_RS08265	BLGT_08460	hypothetical protein	-749809		-2.54819		CDS	with_protein	GCF_000772485.1	Primary Assembly	chromosome		NZ_CP006741.1	1960879	1962552	-	WP_013410663.1	WP_013410663.1				1674	557
BLGT_RS05005	BLGT_05145	virulence protein	-321074		-2.5449		CDS	with_protein	GCF_000772485.1	Primary Assembly	chromosome		NZ_CP006741.1	1212743	1213432	-	WP_038426401.1	WP_038426401.1				690	229
BLGT_RS03635	BLGT_03720	HAD family hydrolase	797992		-2.49779		CDS	with_protein	GCF_000772485.1	Primary Assembly	chromosome		NZ_CP006741.1	892358	893398	+	WP_007053603.1	WP_007053603.1				1041	346
BLGT_RS07105	BLGT_07305	PLP-dependent transferase	-986998		-2.49245		CDS	with_protein	GCF_000772485.1	Primary Assembly	chromosome		NZ_CP006741.1	1691390	1691659	-	WP_038426479.1	WP_038426479.1				270	89
BLGT_RS02840	BLGT_02905	4-hydroxy-tetrahydrodipicolinate reductase	1243266		-2.48296		CDS	with_protein	GCF_000772485.1	Primary Assembly	chromosome		NZ_CP006741.1	704661	705416	+	WP_038426328.1	WP_038426328.1				756	251
BLGT_RS08215	BLGT_08405	energy-dependent translational throttle protein EttA	-569200		-2.46013		CDS	with_protein	GCF_000772485.1	Primary Assembly	chromosome		NZ_CP006741.1	1948682	1950361	+	WP_007053864.1	WP_007053864.1		ettA		1680	559
BLGT_RS10210		hypothetical protein	281857		-2.45878		CDS	with_protein	GCF_000772485.1	Primary Assembly	chromosome		NZ_CP006741.1	1381161	1381955	-	WP_080746422.1	WP_080746422.1				795	264
BLGT_RS06985	BLGT_07180	MFS transporter	275369		-2.45649		CDS	with_protein	GCF_000772485.1	Primary Assembly	chromosome		NZ_CP006741.1	1663812	1665149	+	WP_012471771.1	WP_012471771.1				1338	445
BLGT_RS08180	BLGT_08370	ABC transporter permease	-124707		-2.45209		CDS	with_protein	GCF_000772485.1	Primary Assembly	chromosome		NZ_CP006741.1	1940518	1941735	-	WP_007052409.1	WP_007052409.1				1218	405
BLGT_RS07660	BLGT_07855	primosomal protein N'	-482639		-2.41552		CDS	with_protein	GCF_000772485.1	Primary Assembly	chromosome		NZ_CP006741.1	1817028	1819340	+	WP_038426506.1	WP_038426506.1				2313	770
BLGT_RS05640	BLGT_05780	NADP-dependent isocitrate dehydrogenase	75628		-2.40629		CDS	with_protein	GCF_000772485.1	Primary Assembly	chromosome		NZ_CP006741.1	1336701	1337921	+	WP_008783318.1	WP_008783318.1				1221	406
BLGT_RS06020	BLGT_06180	magnesium transporter CorA family protein	-1891		-2.385		CDS	with_protein	GCF_000772485.1	Primary Assembly	chromosome		NZ_CP006741.1	1413549	1414499	-	WP_007054371.1	WP_007054371.1				951	316
BLGT_RS06015	BLGT_06175	glutamate ABC transporter substrate-binding protein	-48323		-2.37841		CDS	with_protein	GCF_000772485.1	Primary Assembly	chromosome		NZ_CP006741.1	1412608	1413534	-	WP_080746362.1	WP_080746362.1				927	308
BLGT_RS10200		hypothetical protein	353758		-2.31142		CDS	with_protein	GCF_000772485.1	Primary Assembly	chromosome		NZ_CP006741.1	1365211	1366257	-	WP_080746359.1	WP_080746359.1				1047	348
BLGT_RS07260	BLGT_07455	hypothetical protein	365430		-2.31093		CDS	with_protein	GCF_000772485.1	Primary Assembly	chromosome		NZ_CP006741.1	1720015	1720935	+	WP_011067936.1	WP_011067936.1				921	306
BLGT_RS08850	BLGT_09070	CapA family protein	-1157648		-2.30421		CDS	with_protein	GCF_000772485.1	Primary Assembly	chromosome		NZ_CP006741.1	2086365	2087708	-	WP_038426547.1	WP_038426547.1				1344	447
BLGT_RS03795	BLGT_03880	peptidylprolyl isomerase	436928		-2.30316		CDS	with_protein	GCF_000772485.1	Primary Assembly	chromosome		NZ_CP006741.1	930060	930467	+	WP_007051894.1	WP_007051894.1				408	135
BLGT_RS05795	BLGT_05950	hypothetical protein	26421		-2.28946		CDS	with_protein	GCF_000772485.1	Primary Assembly	chromosome		NZ_CP006741.1	1367395	1369386	+	WP_038426440.1	WP_038426440.1				1992	663
BLGT_RS05935	BLGT_06090	hypothetical protein	-350993		-2.28739		CDS	with_protein	GCF_000772485.1	Primary Assembly	chromosome		NZ_CP006741.1	1395807	1396841	+	WP_038426449.1	WP_038426449.1				1035	344
BLGT_RS04295	BLGT_04390	alpha/beta fold hydrolase	344922		-2.28082		CDS	with_protein	GCF_000772485.1	Primary Assembly	chromosome		NZ_CP006741.1	1045848	1047191	+	WP_038426368.1	WP_038426368.1				1344	447
BLGT_RS05920	BLGT_06075	hypothetical protein	9462		-2.26463		CDS	with_protein	GCF_000772485.1	Primary Assembly	chromosome		NZ_CP006741.1	1392113	1392823	+	WP_007054357.1	WP_007054357.1				711	236
BLGT_RS05970	BLGT_06130	ribosomal protein S18-alanine N-acetyltransferase	-721253		-2.26032		CDS	with_protein	GCF_000772485.1	Primary Assembly	chromosome		NZ_CP006741.1	1402285	1402878	-	WP_007052690.1	WP_007052690.1		rimI		594	197
BLGT_RS02800	BLGT_02865	transglutaminase domain-containing protein	-390819		-2.2575		CDS	with_protein	GCF_000772485.1	Primary Assembly	chromosome		NZ_CP006741.1	681625	684138	-	WP_038426324.1	WP_038426324.1				2514	837
BLGT_RS01165	BLGT_01185	DUF2318 domain-containing protein	1360		-2.22665		CDS	with_protein	GCF_000772485.1	Primary Assembly	chromosome		NZ_CP006741.1	293319	294596	+	WP_007054710.1	WP_007054710.1				1278	425
BLGT_RS01175	BLGT_01195	ABC transporter permease	1374872		-2.21228		CDS	with_protein	GCF_000772485.1	Primary Assembly	chromosome		NZ_CP006741.1	295956	297179	+	WP_007056761.1	WP_007056761.1				1224	407
BLGT_RS07020	BLGT_07215	alpha/beta hydrolase	-417466		-2.20427		CDS	with_protein	GCF_000772485.1	Primary Assembly	chromosome		NZ_CP006741.1	1672051	1673829	-	WP_023658473.1	WP_023658473.1				1779	592
BLGT_RS05280	BLGT_05425	DEAD/DEAH box helicase	-960845		-2.20052		CDS	with_protein	GCF_000772485.1	Primary Assembly	chromosome		NZ_CP006741.1	1256363	1258954	-	WP_007055753.1	WP_007055753.1				2592	863
BLGT_RS01185	BLGT_01205	FMN-binding protein	2033060		-2.18991		CDS	with_protein	GCF_000772485.1	Primary Assembly	chromosome		NZ_CP006741.1	298109	298672	+	WP_007056748.1	WP_007056748.1				564	187
BLGT_RS09715	BLGT_09965	YhgE/Pip domain-containing protein	-1225474		-2.18128		CDS	with_protein	GCF_000772485.1	Primary Assembly	chromosome		NZ_CP006741.1	2331732	2334452	+	WP_080746400.1	WP_080746400.1				2721	906
BLGT_RS04580	BLGT_04685	chorismate synthase	922104		-2.17507		CDS	with_protein	GCF_000772485.1	Primary Assembly	chromosome		NZ_CP006741.1	1108978	1110165	+	WP_007052139.1	WP_007052139.1		aroC		1188	395
BLGT_RS08565	BLGT_08775	FAD synthase	54850		-2.16624		CDS	with_protein	GCF_000772485.1	Primary Assembly	chromosome		NZ_CP006741.1	2032269	2033393	-	WP_007055364.1	WP_007055364.1				1125	374
BLGT_RS08860	BLGT_09080	EamA family transporter	-1287224		-2.1604		CDS	with_protein	GCF_000772485.1	Primary Assembly	chromosome		NZ_CP006741.1	2088243	2089307	-	WP_011068738.1	WP_011068738.1				1065	354
BLGT_RS03245	BLGT_03325	hypothetical protein	1126884		-2.15274		CDS	with_protein	GCF_000772485.1	Primary Assembly	chromosome		NZ_CP006741.1	802083	802331	-	WP_007051235.1	WP_007051235.1				249	82
BLGT_RS08120	BLGT_08310	sugar ABC transporter permease	-818232		-2.14853		CDS	with_protein	GCF_000772485.1	Primary Assembly	chromosome		NZ_CP006741.1	1929215	1930267	-	WP_038426527.1	WP_038426527.1				1053	350
BLGT_RS04590	BLGT_04695	type II 3-dehydroquinate dehydratase	378702		-2.12826		CDS	with_protein	GCF_000772485.1	Primary Assembly	chromosome		NZ_CP006741.1	1112035	1112481	+	WP_007052141.1	WP_007052141.1		aroQ		447	148
BLGT_RS06330	BLGT_06500	ABC transporter substrate-binding protein	-647366		-2.11323		CDS	with_protein	GCF_000772485.1	Primary Assembly	chromosome		NZ_CP006741.1	1491183	1492823	-	WP_007054457.1	WP_007054457.1				1641	546
BLGT_RS03415	BLGT_03500	putative sulfate exporter family transporter	241002		-2.10808		CDS	with_protein	GCF_000772485.1	Primary Assembly	chromosome		NZ_CP006741.1	845457	846521	+	WP_007051199.1	WP_007051199.1				1065	354
BLGT_RS04475	BLGT_04580	isochorismatase family protein	18955		-2.10641		CDS	with_protein	GCF_000772485.1	Primary Assembly	chromosome		NZ_CP006741.1	1087523	1088137	-	WP_007052116.1	WP_007052116.1				615	204
BLGT_RS04570	BLGT_04675	endolytic transglycosylase MltG	-281865		-2.09869		CDS	with_protein	GCF_000772485.1	Primary Assembly	chromosome		NZ_CP006741.1	1107092	1108273	+	WP_007053383.1	WP_007053383.1		mltG		1182	393
BLGT_RS03345	BLGT_03425	alpha/beta hydrolase	-224495		-2.09638		CDS	with_protein	GCF_000772485.1	Primary Assembly	chromosome		NZ_CP006741.1	826408	827706	-	WP_038426345.1	WP_038426345.1				1299	432
BLGT_RS02510	BLGT_02565	S9 family peptidase	831755		-2.09172		CDS	with_protein	GCF_000772485.1	Primary Assembly	chromosome		NZ_CP006741.1	603211	605727	+	WP_007051336.1	WP_007051336.1				2517	838
BLGT_RS06110	BLGT_06275	MFS transporter	-359827		-2.07795		CDS	with_protein	GCF_000772485.1	Primary Assembly	chromosome		NZ_CP006741.1	1437482	1438696	-	WP_011068046.1	WP_011068046.1				1215	404
BLGT_RS04440	BLGT_04540	DUF47 family protein	-457697		-2.07118		CDS	with_protein	GCF_000772485.1	Primary Assembly	chromosome		NZ_CP006741.1	1078869	1079492	+	WP_038426375.1	WP_038426375.1				624	207
BLGT_RS02570	BLGT_02635	sugar ABC transporter permease	266464		-2.07001		CDS	with_protein	GCF_000772485.1	Primary Assembly	chromosome		NZ_CP006741.1	621795	622766	+	WP_032682407.1	WP_032682407.1				972	323
BLGT_RS03625	BLGT_03710	tyrosine--tRNA ligase	-75389		-2.06334		CDS	with_protein	GCF_000772485.1	Primary Assembly	chromosome		NZ_CP006741.1	889230	890552	+	WP_038426350.1	WP_038426350.1				1323	440
BLGT_RS03295	BLGT_03375	cupin domain-containing protein	683929		-2.05643		CDS	with_protein	GCF_000772485.1	Primary Assembly	chromosome		NZ_CP006741.1	815163	815633	-	WP_007051224.1	WP_007051224.1				471	156
BLGT_RS06365	BLGT_06535	MFS transporter	416389		-2.04389		CDS	with_protein	GCF_000772485.1	Primary Assembly	chromosome		NZ_CP006741.1	1499562	1500911	-	WP_038426459.1	WP_038426459.1				1350	449
BLGT_RS08065	BLGT_08250	tRNA-Ile	-306831		-2.03065		tRNA		GCF_000772485.1	Primary Assembly	chromosome		NZ_CP006741.1	1917300	1917373	-						74		anticodon=CAT
BLGT_RS06775	BLGT_06970	MFS transporter	-1116486		-2.02889		CDS	with_protein	GCF_000772485.1	Primary Assembly	chromosome		NZ_CP006741.1	1610542	1611012	-	WP_007054387.1	WP_007054387.1				471	156
BLGT_RS02065	BLGT_02110	DUF1177 domain-containing protein	806331		-2.02475		CDS	with_protein	GCF_000772485.1	Primary Assembly	chromosome		NZ_CP006741.1	494526	495461	+	WP_007057858.1	WP_007057858.1				936	311
BLGT_RS05495	BLGT_05635	excinuclease ABC subunit UvrC	-517833		-2.02437		CDS	with_protein	GCF_000772485.1	Primary Assembly	chromosome		NZ_CP006741.1	1301792	1304158	-	WP_015713650.1	WP_015713650.1		uvrC		2367	788
BLGT_RS03175	BLGT_03255	anion transporter	-506226		-2.01175		CDS	with_protein	GCF_000772485.1	Primary Assembly	chromosome		NZ_CP006741.1	786325	787527	+	WP_007056444.1	WP_007056444.1				1203	400
BLGT_RS09925		hypothetical protein	697422		-2.00957		CDS	with_protein	GCF_000772485.1	Primary Assembly	chromosome		NZ_CP006741.1	281301	281795	-	WP_080746336.1	WP_080746336.1				495	164
BLGT_RS04015	BLGT_04100	hypothetical protein	-70410		-2.00768		CDS	with_protein	GCF_000772485.1	Primary Assembly	chromosome		NZ_CP006741.1	979217	980389	+	WP_007052026.1	WP_007052026.1				1173	390
BLGT_RS03715	BLGT_03800	glutamate-5-semialdehyde dehydrogenase	1351889		-2.00055		CDS	with_protein	GCF_000772485.1	Primary Assembly	chromosome		NZ_CP006741.1	909979	911391	+	WP_011068261.1	WP_011068261.1				1413	470
BLGT_RS09495	BLGT_09750	class II glutamine amidotransferase	-473376		2.00867		CDS	with_protein	GCF_000772485.1	Primary Assembly	chromosome		NZ_CP006741.1	2263280	2264140	-	WP_007055576.1	WP_007055576.1				861	286
BLGT_RS07525	BLGT_07720	TPM domain-containing protein	-1679557		2.01113		CDS	with_protein	GCF_000772485.1	Primary Assembly	chromosome		NZ_CP006741.1	1790764	1791570	-	WP_080746374.1	WP_080746374.1				807	268
BLGT_RS00435	BLGT_00430	peroxiredoxin	478021		2.01998		CDS	with_protein	GCF_000772485.1	Primary Assembly	chromosome		NZ_CP006741.1	112013	112576	+	WP_007056578.1	WP_007056578.1		ahpC		564	187
BLGT_RS02440	BLGT_02500	hypothetical protein	1506344		2.028		CDS	with_protein	GCF_000772485.1	Primary Assembly	chromosome		NZ_CP006741.1	590597	590806	-	WP_007055293.1	WP_007055293.1				210	69
BLGT_RS08895	BLGT_09115	succinyldiaminopimelate transaminase	-916737		2.02887		CDS	with_protein	GCF_000772485.1	Primary Assembly	chromosome		NZ_CP006741.1	2097150	2098394	-	WP_038426552.1	WP_038426552.1				1245	414
BLGT_RS10145		DUF1829 domain-containing protein	772801		2.03031		CDS	without_protein	GCF_000772485.1	Primary Assembly	chromosome		NZ_CP006741.1	1181657	1181973	+						317		pseudo
BLGT_RS08240	BLGT_08430	GTP cyclohydrolase I FolE	157834		2.03794		CDS	with_protein	GCF_000772485.1	Primary Assembly	chromosome		NZ_CP006741.1	1954774	1955373	-	WP_038426531.1	WP_038426531.1		folE		600	199
BLGT_RS08980	BLGT_09200	FHA domain-containing protein	-817533		2.03996		CDS	with_protein	GCF_000772485.1	Primary Assembly	chromosome		NZ_CP006741.1	2113207	2114736	-	WP_080746385.1	WP_080746385.1				1530	509
BLGT_RS05475	BLGT_05615	phosphoglycerate kinase	-58505		2.04116		CDS	with_protein	GCF_000772485.1	Primary Assembly	chromosome		NZ_CP006741.1	1297203	1298408	-	WP_038426420.1	WP_038426420.1		pgk		1206	401
BLGT_RS09765		hypothetical protein	434908		2.04908		CDS	with_protein	GCF_000772485.1	Primary Assembly	chromosome		NZ_CP006741.1	1239903	1240196	+	WP_013410879.1	WP_013410879.1				294	97
BLGT_RS07030	BLGT_07225	1-deoxy-D-xylulose-5-phosphate reductoisomerase	640734		2.0555		CDS	with_protein	GCF_000772485.1	Primary Assembly	chromosome		NZ_CP006741.1	1675104	1676294	-	WP_007055434.1	WP_007055434.1				1191	396
BLGT_RS09655	BLGT_09905	ATP-binding protein	-1439569		2.05669		CDS	with_protein	GCF_000772485.1	Primary Assembly	chromosome		NZ_CP006741.1	2317028	2318440	-	WP_013141475.1	WP_013141475.1				1413	470
BLGT_RS03570	BLGT_03655	acetylornithine transaminase	-303806		2.06631		CDS	with_protein	GCF_000772485.1	Primary Assembly	chromosome		NZ_CP006741.1	878871	880166	+	WP_007051166.1	WP_007051166.1				1296	431
BLGT_RS02370	BLGT_02420	DUF4012 domain-containing protein	510861		2.07198		CDS	with_protein	GCF_000772485.1	Primary Assembly	chromosome		NZ_CP006741.1	576360	577925	+	WP_007055716.1	WP_007055716.1				1566	521
BLGT_RS04485	BLGT_04590	cobalt transporter	-587900		2.08026		CDS	with_protein	GCF_000772485.1	Primary Assembly	chromosome		NZ_CP006741.1	1088786	1089724	-	WP_007052119.1	WP_007052119.1				939	312
BLGT_RS02105	BLGT_02150	aminoacyltransferase	1016382		2.08955		CDS	with_protein	GCF_000772485.1	Primary Assembly	chromosome		NZ_CP006741.1	501824	503092	+	WP_007051400.1	WP_007051400.1				1269	422
BLGT_RS06455	BLGT_06625	hypothetical protein	-1403289		2.09183		CDS	with_protein	GCF_000772485.1	Primary Assembly	chromosome		NZ_CP006741.1	1519474	1519899	-	WP_144314112.1	WP_144314112.1				426	141
BLGT_RS00450	BLGT_00450	LacI family transcriptional regulator	-82393		2.0925		CDS	with_protein	GCF_000772485.1	Primary Assembly	chromosome		NZ_CP006741.1	116610	117617	+	WP_007051734.1	WP_007051734.1				1008	335
BLGT_RS00130	BLGT_00125	class C sortase	565600		2.09438		CDS	with_protein	GCF_000772485.1	Primary Assembly	chromosome		NZ_CP006741.1	35224	36210	-	WP_007054630.1	WP_007054630.1				987	328
BLGT_RS02505	BLGT_02560	DUF2183 domain-containing protein	-381740		2.09442		CDS	with_protein	GCF_000772485.1	Primary Assembly	chromosome		NZ_CP006741.1	601810	603150	+	WP_011068354.1	WP_011068354.1				1341	446
BLGT_RS00875	BLGT_00880	alpha-glucosidase	-209368		2.09633		CDS	with_protein	GCF_000772485.1	Primary Assembly	chromosome		NZ_CP006741.1	221410	223947	+	WP_038426250.1	WP_038426250.1				2538	845
BLGT_RS00055	BLGT_00050	ROK family transcriptional regulator	118670		2.0969		CDS	with_protein	GCF_000772485.1	Primary Assembly	chromosome		NZ_CP006741.1	14579	15787	+	WP_007054616.1	WP_007054616.1				1209	402
BLGT_RS00510	BLGT_00510	hypothetical protein	517422		2.10051		CDS	with_protein	GCF_000772485.1	Primary Assembly	chromosome		NZ_CP006741.1	134457	134990	-	WP_011068574.1	WP_011068574.1				534	177
BLGT_RS10030		glycosyltransferase family 4 protein	721717		2.10603		CDS	with_protein	GCF_000772485.1	Primary Assembly	chromosome		NZ_CP006741.1	652412	653611	+	WP_007055180.1	WP_007055180.1				1200	399
BLGT_RS05835	BLGT_05990	type IV secretory system conjugative DNA transfer family protein	64115		2.10681		CDS	with_protein	GCF_000772485.1	Primary Assembly	chromosome		NZ_CP006741.1	1375328	1377136	+	WP_032684892.1	WP_032684892.1				1809	602
BLGT_RS06120	BLGT_06285	RNA polymerase sigma factor	-1034393		2.11062		CDS	with_protein	GCF_000772485.1	Primary Assembly	chromosome		NZ_CP006741.1	1441251	1442675	-	WP_007055162.1	WP_007055162.1				1425	474
BLGT_RS01660	BLGT_01705	F0F1 ATP synthase subunit B	-176849		2.12276		CDS	with_protein	GCF_000772485.1	Primary Assembly	chromosome		NZ_CP006741.1	408282	408800	+	WP_007051482.1	WP_007051482.1				519	172
BLGT_RS00910	BLGT_00920	acyl-CoA reductase	-209489		2.14088		CDS	with_protein	GCF_000772485.1	Primary Assembly	chromosome		NZ_CP006741.1	231951	233450	+	WP_007057589.1	WP_007057589.1				1500	499
BLGT_RS00090		sugar-binding protein	1710962		2.14548		CDS	with_protein	GCF_000772485.1	Primary Assembly	chromosome		NZ_CP006741.1	23961	25691	+	WP_038426213.1	WP_038426213.1				1731	576
BLGT_RS07310	BLGT_07505	nitroreductase	250122		2.14625		CDS	with_protein	GCF_000772485.1	Primary Assembly	chromosome		NZ_CP006741.1	1736653	1737438	+	WP_007053236.1	WP_007053236.1				786	261
BLGT_RS08400	BLGT_08595	phosphoglyceromutase	-386362		2.14737		CDS	with_protein	GCF_000772485.1	Primary Assembly	chromosome		NZ_CP006741.1	1987560	1988300	-	WP_007052347.1	WP_007052347.1				741	246
BLGT_RS06750	BLGT_06945	L-lactate dehydrogenase	-721728		2.15162		CDS	with_protein	GCF_000772485.1	Primary Assembly	chromosome		NZ_CP006741.1	1601938	1602900	-	WP_007052533.1	WP_007052533.1				963	320
BLGT_RS03580	BLGT_03665	arginine repressor	979576		2.16283		CDS	with_protein	GCF_000772485.1	Primary Assembly	chromosome		NZ_CP006741.1	881172	881684	+	WP_007056352.1	WP_007056352.1		argR		513	170
BLGT_RS07840	BLGT_08030	activase	-1195559		2.18401		CDS	with_protein	GCF_000772485.1	Primary Assembly	chromosome		NZ_CP006741.1	1861260	1866179	-	WP_038426516.1	WP_038426516.1				4920	1639
BLGT_RS02770	BLGT_02835	hypothetical protein	-602351		2.18561		CDS	with_protein	GCF_000772485.1	Primary Assembly	chromosome		NZ_CP006741.1	670620	671342	+	WP_007056459.1	WP_007056459.1				723	240
BLGT_RS09815		NUDIX hydrolase	1857051		2.20252		CDS	with_protein	GCF_000772485.1	Primary Assembly	chromosome		NZ_CP006741.1	68991	69536	+	WP_011068601.1	WP_011068601.1				546	181
BLGT_RS08110	BLGT_08300	glycoside hydrolase family 43 protein	-732192		2.22545		CDS	with_protein	GCF_000772485.1	Primary Assembly	chromosome		NZ_CP006741.1	1926587	1928206	-	WP_038426526.1	WP_038426526.1				1620	539
BLGT_RS04940	BLGT_05075	bifunctional [glutamine synthetase] adenylyltransferase/[glutamine synthetase]-adenylyl-L-tyrosine phosphorylase	839233		2.23355		CDS	with_protein	GCF_000772485.1	Primary Assembly	chromosome		NZ_CP006741.1	1196014	1199244	+	WP_007052222.1	WP_007052222.1				3231	1076
BLGT_RS08585	BLGT_08795	transcription termination/antitermination protein NusA	-508804		2.24629		CDS	with_protein	GCF_000772485.1	Primary Assembly	chromosome		NZ_CP006741.1	2038477	2039544	-	WP_007052305.1	WP_007052305.1		nusA		1068	355
BLGT_RS06500	BLGT_06685	GNAT family N-acetyltransferase	-672084		2.25822		CDS	with_protein	GCF_000772485.1	Primary Assembly	chromosome		NZ_CP006741.1	1530740	1531735	+	WP_007055266.1	WP_007055266.1				996	331
BLGT_RS03490	BLGT_03575	hypothetical protein	-839021		2.27725		CDS	with_protein	GCF_000772485.1	Primary Assembly	chromosome		NZ_CP006741.1	859651	860238	+	WP_007056353.1	WP_007056353.1				588	195
BLGT_RS00075	BLGT_00070	phospholipase/carboxylesterase	57740		2.28084		CDS	with_protein	GCF_000772485.1	Primary Assembly	chromosome		NZ_CP006741.1	21217	21975	-	WP_007056568.1	WP_007056568.1				759	252
BLGT_RS00280	BLGT_00275	16S rRNA (guanine(527)-N(7))-methyltransferase RsmG	32365		2.2874		CDS	with_protein	GCF_000772485.1	Primary Assembly	chromosome		NZ_CP006741.1	79715	80380	-	WP_007056575.1	WP_007056575.1		rsmG		666	221
BLGT_RS00440	BLGT_00435	FAD-dependent oxidoreductase	1994711		2.30684		CDS	with_protein	GCF_000772485.1	Primary Assembly	chromosome		NZ_CP006741.1	112745	114661	+	WP_038426227.1	WP_038426227.1				1917	638
BLGT_RS08970	BLGT_09190	hypothetical protein	3		2.31206		CDS	with_protein	GCF_000772485.1	Primary Assembly	chromosome		NZ_CP006741.1	2109372	2109572	-	WP_007053005.1	WP_007053005.1				201	66
BLGT_RS08975	BLGT_09195	helicase	-1762304		2.31448		CDS	with_protein	GCF_000772485.1	Primary Assembly	chromosome		NZ_CP006741.1	2109575	2113198	-	WP_038426558.1	WP_038426558.1				3624	1207
BLGT_RS01385	BLGT_01405	phosphoenolpyruvate--protein phosphotransferase	609176		2.34386		CDS	with_protein	GCF_000772485.1	Primary Assembly	chromosome		NZ_CP006741.1	350894	352573	+	WP_038426261.1	WP_038426261.1		ptsP		1680	559
BLGT_RS03940	BLGT_04020	pyruvate kinase	564947		2.35434		CDS	with_protein	GCF_000772485.1	Primary Assembly	chromosome		NZ_CP006741.1	961749	963191	+	WP_007055467.1	WP_007055467.1		pyk		1443	480
BLGT_RS06490	BLGT_06675	sigma-70 family RNA polymerase sigma factor	-873483		2.35473		CDS	with_protein	GCF_000772485.1	Primary Assembly	chromosome		NZ_CP006741.1	1528138	1528947	-	WP_080746368.1	WP_080746368.1				810	269
BLGT_RS10035		IS256 family transposase	#REF!		2.40947		CDS	without_protein	GCF_000772485.1	Primary Assembly	chromosome		NZ_CP006741.1	655464	655781	+						318		partial;pseudo
BLGT_RS06445	BLGT_06615	type I glyceraldehyde-3-phosphate dehydrogenase	-1464532		2.41488		CDS	with_protein	GCF_000772485.1	Primary Assembly	chromosome		NZ_CP006741.1	1517663	1518721	+	WP_038426460.1	WP_038426460.1		gap		1059	352
BLGT_RS00180	BLGT_00175	helix-turn-helix transcriptional regulator	915034		2.41913		CDS	with_protein	GCF_000772485.1	Primary Assembly	chromosome		NZ_CP006741.1	54189	54812	-	WP_080746401.1	WP_080746401.1				624	207
BLGT_RS03975	BLGT_04055	glycogen debranching protein GlgX	-460950		2.42637		CDS	with_protein	GCF_000772485.1	Primary Assembly	chromosome		NZ_CP006741.1	969846	971987	+	WP_080746349.1	WP_080746349.1		glgX		2142	713
BLGT_RS02150	BLGT_02195	DUF1788 domain-containing protein	782388		2.44039		CDS	with_protein	GCF_000772485.1	Primary Assembly	chromosome		NZ_CP006741.1	511037	511744	+	WP_032738769.1	WP_032738769.1				708	235
BLGT_RS05455	BLGT_05595	HAD family hydrolase	-322945		2.46702		CDS	with_protein	GCF_000772485.1	Primary Assembly	chromosome		NZ_CP006741.1	1294132	1294983	-	WP_050491733.1	WP_050491733.1				852	283
BLGT_RS03980	BLGT_04060	hypothetical protein	582764		2.46746		CDS	with_protein	GCF_000772485.1	Primary Assembly	chromosome		NZ_CP006741.1	972038	972268	+	WP_032737930.1	WP_032737930.1				231	76
BLGT_RS06580	BLGT_06765	VOC family protein	-1537043		2.48527		CDS	with_protein	GCF_000772485.1	Primary Assembly	chromosome		NZ_CP006741.1	1555032	1555421	+	WP_007054419.1	WP_007054419.1				390	129
BLGT_RS00065	BLGT_00060	nucleoside deaminase	102040		2.49948		CDS	with_protein	GCF_000772485.1	Primary Assembly	chromosome		NZ_CP006741.1	18378	18854	-	WP_077321573.1	WP_077321573.1				477	158
BLGT_RS00465	BLGT_00470	hypothetical protein	287108		2.52128		CDS	with_protein	GCF_000772485.1	Primary Assembly	chromosome		NZ_CP006741.1	120894	121727	+	WP_038426229.1	WP_038426229.1				834	277
BLGT_RS01665	BLGT_01710	F0F1 ATP synthase subunit delta	-22489		2.54145		CDS	with_protein	GCF_000772485.1	Primary Assembly	chromosome		NZ_CP006741.1	408835	409671	+	WP_007054765.1	WP_007054765.1				837	278
BLGT_RS10705		hypothetical protein	-202115		2.55535		CDS	with_protein	GCF_000772485.1	Primary Assembly	chromosome		NZ_CP006741.1	387182	387463	-	WP_013140164.1	WP_013140164.1				282	93
BLGT_RS00730	BLGT_00725	tRNA-Gly	1638409		2.5668		tRNA		GCF_000772485.1	Primary Assembly	chromosome		NZ_CP006741.1	185348	185421	+						74		anticodon=CCC
BLGT_RS07685	BLGT_07880	methionine adenosyltransferase	-453958		2.57251		CDS	with_protein	GCF_000772485.1	Primary Assembly	chromosome		NZ_CP006741.1	1823830	1825050	+	WP_038426509.1	WP_038426509.1				1221	406
BLGT_RS05810	BLGT_05965	ATPase	843103		2.58728		CDS	with_protein	GCF_000772485.1	Primary Assembly	chromosome		NZ_CP006741.1	1371092	1372510	+	WP_032735530.1	WP_032735530.1				1419	472
BLGT_RS09320	BLGT_09560	RNA degradosome polyphosphate kinase	-922870		2.59613		CDS	with_protein	GCF_000772485.1	Primary Assembly	chromosome		NZ_CP006741.1	2215613	2217850	+	WP_007053089.1	WP_007053089.1				2238	745
BLGT_RS05460	BLGT_05600	L-lactate dehydrogenase	-906305		2.62775		CDS	with_protein	GCF_000772485.1	Primary Assembly	chromosome		NZ_CP006741.1	1294980	1295930	-	WP_007056108.1	WP_007056108.1				951	316
BLGT_RS01530	BLGT_01555	hypothetical protein	1431338		2.63084		CDS	with_protein	GCF_000772485.1	Primary Assembly	chromosome		NZ_CP006741.1	389625	389867	-	WP_007051508.1	WP_007051508.1				243	80
BLGT_RS07675	BLGT_07870	dihydroxy-acid dehydratase	-826885		2.63104		CDS	with_protein	GCF_000772485.1	Primary Assembly	chromosome		NZ_CP006741.1	1821205	1823067	-	WP_080746375.1	WP_080746375.1		ilvD		1863	620
BLGT_RS04095	BLGT_04190	MFS transporter	-147416		2.63142		CDS	with_protein	GCF_000772485.1	Primary Assembly	chromosome		NZ_CP006741.1	996182	997273	+	WP_077382859.1	WP_077382859.1				1092	363
BLGT_RS03440	BLGT_03525	hypothetical protein	30162		2.64983		CDS	with_protein	GCF_000772485.1	Primary Assembly	chromosome		NZ_CP006741.1	849857	850048	+	WP_007056374.1	WP_007056374.1				192	63
BLGT_RS03575	BLGT_03660	ornithine carbamoyltransferase	1208172		2.67536		CDS	with_protein	GCF_000772485.1	Primary Assembly	chromosome		NZ_CP006741.1	880210	881175	+	WP_007056332.1	WP_007056332.1		argF		966	321
BLGT_RS08865	BLGT_09085	DNA polymerase IV	-1970464		2.76425		CDS	with_protein	GCF_000772485.1	Primary Assembly	chromosome		NZ_CP006741.1	2089347	2090693	+	WP_080746383.1	WP_080746383.1		dinB		1347	448
BLGT_RS00460		hypothetical protein	1134209		2.78338		CDS	with_protein	GCF_000772485.1	Primary Assembly	chromosome		NZ_CP006741.1	120229	120840	-	WP_077384257.1	WP_077384257.1				612	203
BLGT_RS05270	BLGT_05415	HAD family hydrolase	391731		2.80473		CDS	with_protein	GCF_000772485.1	Primary Assembly	chromosome		NZ_CP006741.1	1255049	1255768	-	WP_007052873.1	WP_007052873.1				720	239
BLGT_RS06920	BLGT_07110	cell division protein SepF	-1198226		2.82098		CDS	with_protein	GCF_000772485.1	Primary Assembly	chromosome		NZ_CP006741.1	1647499	1647978	-	WP_007053320.1	WP_007053320.1		sepF		480	159
BLGT_RS01865	BLGT_01910	hypothetical protein	-329522		2.83749		CDS	with_protein	GCF_000772485.1	Primary Assembly	chromosome		NZ_CP006741.1	449752	451320	+	WP_023658062.1	WP_023658062.1				1569	522
BLGT_RS00470		hypothetical protein	1049795		2.84863		CDS	with_protein	GCF_000772485.1	Primary Assembly	chromosome		NZ_CP006741.1	121798	122418	-	WP_080746403.1	WP_080746403.1				621	206
BLGT_RS04830	BLGT_04960	carbon-nitrogen hydrolase family protein	995090		3.01303		CDS	with_protein	GCF_000772485.1	Primary Assembly	chromosome		NZ_CP006741.1	1172213	1173046	+	WP_038426617.1	WP_038426617.1				834	277
BLGT_RS09135	BLGT_09360	5S ribosomal RNA	-539286		3.0309		rRNA		GCF_000772485.1	Primary Assembly	chromosome		NZ_CP006741.1	2168136	2168252	-				rrf		117
BLGT_RS06850	BLGT_07040	5S ribosomal RNA	-340599		3.03091		rRNA		GCF_000772485.1	Primary Assembly	chromosome		NZ_CP006741.1	1628966	1629082	-				rrf		117
BLGT_RS05435	BLGT_05575	transaldolase	-413999		3.14963		CDS	with_protein	GCF_000772485.1	Primary Assembly	chromosome		NZ_CP006741.1	1288483	1289586	+	WP_003829348.1	WP_003829348.1		tal		1104	367
BLGT_RS03555	BLGT_03640	N-acetyl-gamma-glutamyl-phosphate reductase	771310		3.27114		CDS	with_protein	GCF_000772485.1	Primary Assembly	chromosome		NZ_CP006741.1	875587	876681	+	WP_012471942.1	WP_012471942.1				1095	364
BLGT_RS06925	BLGT_07115	cell division protein FtsZ	-782141		3.31522		CDS	with_protein	GCF_000772485.1	Primary Assembly	chromosome		NZ_CP006741.1	1647991	1649202	-	WP_007054067.1	WP_007054067.1		ftsZ		1212	403
BLGT_RS03520	BLGT_03605	ECF transporter S component	104672		3.34771		CDS	with_protein	GCF_000772485.1	Primary Assembly	chromosome		NZ_CP006741.1	867061	867660	+	WP_008782764.1	WP_008782764.1				600	199
BLGT_RS03985	BLGT_04065	tRNA-Pro	817635		3.38437		tRNA		GCF_000772485.1	Primary Assembly	chromosome		NZ_CP006741.1	972332	972405	-						74		anticodon=TGG
BLGT_RS07520	BLGT_07715	response regulator transcription factor	-1790771		3.55141		CDS	with_protein	GCF_000772485.1	Primary Assembly	chromosome		NZ_CP006741.1	1790040	1790771	-	WP_007053191.1	WP_007053191.1				732	243

## Sheet: Лист1
№	Sample	RNA for depletion (420 ng), µkl	H2O for depletion, µkl	Barcodes1	Barcodes2	Conc Lib, ng/µkl
1	КМ_С1_5_191	3.8	2.2
2	КМ_С2_5_191	4.4	1.6
3	КМ_С3_5_191	5.4	0.6
4	КМ_E1_5_191	4.7	1.3
5	КМ_E2_5_191	5	1
6	КМ_E3_5_191	6	0
7	КМ_С1_30_191	4.2	1.8
8	КМ_С2_30_191	3.9	2.1
9	КМ_С3_30_191	4.3	1.7
10	КМ_E1_30_191	4.1	1.9
11	КМ_E2_30_191	4	2
12	КМ_E3_30_191	4.2	1.8
13	LF_C1	6	0
14	LF_C2	3|3	0
15	LF_C3	6	0
16	LF_E1	3|3	0
17	LF_E2	6	0
18	LF_E3	6	0
19	MS_C7	6	0
20	MS_C8	6	0
21	MS_C9	4.2	1.8
22	MS_Lia1	2.5	3.5
23	MS_Lia2	2.8	3.2
24	MS_Lia3	2.8	3.2
