# Supplementary material for: The Gene Expression Profile Differs in Growth Phases of the Bifidobacterium Longum Culture
Source: Microorganisms. 2022 Aug 21;10(8):1683. doi: 10.3390/microorganisms10081683 (PMC9415070; doi:10.3390/microorganisms10081683)
Supplement: Supplementary file 1 [file microorganisms-10-01683-s001.zip › Table S2.xlsx]

## Sheet: K05_K01
Locus	Pathways	N all_genes	N GT15_ex/GT15_lag_all DEGs	Delta (All_DEGs/All_genes)	N upregulated	Delta Upper: (GT15_ex/GT15_lag)/All_DEGs	N downregulated	Delta Down: (GT15_ex/GT15_lag)/All_DEGs
blz00970	Aminoacyl-tRNA biosynthesis	75	5	6.7	5	100		0
blz00230	Purine metabolism	37	1	2.7	1	100		0
blz00500	Starch and sucrose metabolism	25	2	8	2	100		0
blz00250	Alanine, aspartate and glutamate metabolism	19	3	15.8	3	100		0
blz00010	Glycolysis / Gluconeogenesis	20	2	10	2	100		0
blz00220	Arginine biosynthesis	12	3	25	3	100		0
blz03030	DNA replication	13	1	7.7	1	100		0
blz00190	Oxidative phosphorylation	12	4	33.3	4	100		0
blz00680	Methane metabolism	11	1	9.1	1	100		0
blz03018	RNA degradation	10	2	20	2	100		0
blz00770	Pantothenate and CoA biosynthesis	11	2	18.2	2	100		0
blz00910	Nitrogen metabolism	6	2	33.3	2	100		0
blz00521	Streptomycin biosynthesis	4	1	25	1	100		0
blz00052	Galactose metabolism	20	4	20	3	75	1	25
blz01120	Microbial metabolism in diverse environments	77	7	9.1	5	71.4286	2	28.5714
blz01200	Carbon metabolism	46	3	6.5	2	66.6667	1	33.3333
blz00520	Amino sugar and nucleotide sugar metabolism	27	3	11.1	2	66.6667	1	33.3333
blz03440	Homologous recombination	22	3	13.6	2	66.6667	1	33.3333
blz01110	Biosynthesis of secondary metabolites	166	14	8.4	9	64.2857	5	35.7143
blz03010	Ribosome	63	14	22.2	9	64.2857	5	35.7143
blz01230	Biosynthesis of amino acids	95	10	10.5	6	60	4	40
blz01100	Metabolic pathways	342	33	9.6	18	54.5455	15	45.4545
blz02020	Two-component system	17	2	11.8	1	50	1	50
blz03430	Mismatch repair	13	2	15.4	1	50	1	50
blz00730	Thiamine metabolism	8	2	25	1	50	1	50
blz00541	O-Antigen nucleotide sugar biosynthesis	6	2	33.3	1	50	1	50
blz02024	Quorum sensing	41	11	26.8	5	45.4545	6	54.5455
blz01240	Biosynthesis of cofactors	56	7	12.5	3	42.8571	4	57.1429
blz01210	2-Oxocarboxylic acid metabolism	21	5	23.8	2	40	3	60
blz02010	ABC transporters	53	17	32.1	3	17.6471	14	82.3529
blz00270	Cysteine and methionine metabolism	27	1	3.7		0	1	100
blz00260	Glycine, serine and threonine metabolism	20	2	10		0	2	100
blz00400	Phenylalanine, tyrosine and tryptophan biosynthesis	19	1	5.3		0	1	100
blz00620	Pyruvate metabolism	15	1	6.7		0	1	100
blz00630	Glyoxylate and dicarboxylate metabolism	14	2	14.3		0	2	100
blz03060	Protein export	12	1	8.3		0	1	100
blz00290	Valine, leucine and isoleucine biosynthesis	11	2	18.2		0	2	100
blz00340	Histidine metabolism	11	1	9.1		0	1	100
blz00330	Arginine and proline metabolism	10	2	20		0	2	100
blz03070	Bacterial secretion system	9	1	11.1		0	1	100
blz03420	Nucleotide excision repair	10	1	10		0	1	100
blz00900	Terpenoid backbone biosynthesis	9	1	11.1		0	1	100
blz00660	C5-Branched dibasic acid metabolism	7	1	14.3		0	1	100
blz00020	Citrate cycle TCA cycle)	8	1	12.5		0	1	100
blz00561	Glycerolipid metabolism	7	2	28.6		0	2	100
blz00750	Vitamin B6 metabolism	7	2	28.6		0	2	100
blz00480	Glutathione metabolism	7	1	14.3		0	1	100
blz00310	Lysine degradation	3	1	33.3		0	1	100
blz04122	Sulfur relay system	3	2	66.7		0	2	100
blz00472	D-Arginine and D-ornithine metabolism	1	1	100		0	1	100

## Sheet: K09_K01
Locus	Pathways	N all_genes	N K09/K01_all DEGs	Delta (All_DEGs/All_genes)	N upregulated	Delta Upper: (GT15_st/GT15_lag)/All_DEGs	N downregulated	Delta Down: (GT15_st/GT15_lag)/All_DEGs
blz00500	Starch and sucrose metabolism	25	7	28	7	100		0
blz00030	Pentose phosphate pathway	17	2	11.8	2	100		0
blz00640	Propanoate metabolism	12	2	16.7	2	100		0
blz03060	Protein export	12	1	8.3	1	100		0
blz00670	One carbon pool by folate	10	1	10	1	100		0
blz00450	Selenocompound metabolism	10	2	20	2	100		0
blz00040	Pentose and glucuronate interconversions	9	4	44.4	4	100		0
blz03018	RNA degradation	10	4	40	4	100		0
blz00900	Terpenoid backbone biosynthesis	9	2	22.2	2	100		0
blz00790	Folate biosynthesis	7	1	14.3	1	100		0
blz00051	Fructose and mannose metabolism	4	2	50	2	100		0
blz02060	Phosphotransferase system PTS)	3	2	66.7	2	100		0
blz03010	Ribosome	63	9	14.3	8	88.8889	1	11.1111
blz00190	Oxidative phosphorylation	12	8	66.7	7	87.5	1	12.5
blz00520	Amino sugar and nucleotide sugar metabolism	27	7	25.9	6	85.7143	1	14.2857
blz00220	Arginine biosynthesis	12	7	58.3	6	85.7143	1	14.2857
blz00010	Glycolysis / Gluconeogenesis	20	9	45	7	77.7778	2	22.2222
blz00230	Purine metabolism	37	9	24.3	6	66.6667	3	33.3333
blz00052	Galactose metabolism	20	3	15	2	66.6667	1	33.3333
blz00620	Pyruvate metabolism	15	6	40	4	66.6667	2	33.3333
blz00760	Nicotinate and nicotinamide metabolism	14	3	21.4	2	66.6667	1	33.3333
blz00660	C5-Branched dibasic acid metabolism	7	3	42.9	2	66.6667	1	33.3333
blz00910	Nitrogen metabolism	6	3	50	2	66.6667	1	33.3333
blz01110	Biosynthesis of secondary metabolites	166	51	30.7	32	62.7451	19	37.2549
blz01200	Carbon metabolism	46	13	28.3	8	61.5385	5	38.4615
blz01100	Metabolic pathways	342	102	29.8	62	60.7843	40	39.2157
blz00250	Alanine, aspartate and glutamate metabolism	19	5	26.3	3	60	2	40
blz00290	Valine, leucine and isoleucine biosynthesis	11	5	45.5	3	60	2	40
blz01210	2-Oxocarboxylic acid metabolism	21	12	57.1	7	58.3333	5	41.6667
blz01230	Biosynthesis of amino acids	95	38	40	22	57.8947	16	42.1053
blz01120	Microbial metabolism in diverse environments	77	25	32.5	13	52	12	48
blz02020	Two-component system	17	6	35.3	3	50	3	50
blz00550	Peptidoglycan biosynthesis	17	2	11.8	1	50	1	50
blz00680	Methane metabolism	11	4	36.4	2	50	2	50
blz00053	Ascorbate and aldarate metabolism	2	2	100	1	50	1	50
blz00270	Cysteine and methionine metabolism	27	11	40.7	5	45.4545	6	54.5455
blz00630	Glyoxylate and dicarboxylate metabolism	14	5	35.7	2	40	3	60
blz00770	Pantothenate and CoA biosynthesis	11	5	45.5	2	40	3	60
blz01240	Biosynthesis of cofactors	56	14	25	5	35.7143	9	64.2857
blz03440	Homologous recombination	22	6	27.3	2	33.3333	4	66.6667
blz00340	Histidine metabolism	11	3	27.3	1	33.3333	2	66.6667
blz02024	Quorum sensing	41	10	24.4	3	30	7	70
blz00970	Aminoacyl-tRNA biosynthesis	75	8	10.7	2	25	6	75
blz00260	Glycine, serine and threonine metabolism	20	8	40	2	25	6	75
blz03030	DNA replication	13	4	30.8	1	25	3	75
blz00300	Lysine biosynthesis	11	4	36.4	1	25	3	75
blz00750	Vitamin B6 metabolism	7	4	57.1	1	25	3	75
blz00240	Pyrimidine metabolism	23	5	21.7	1	20	4	80
blz02010	ABC transporters	53	23	43.4	4	17.3913	19	82.6087
blz00400	Phenylalanine, tyrosine and tryptophan biosynthesis	19	2	10.5		0	2	100
blz03430	Mismatch repair	13	1	7.7		0	1	100
blz00330	Arginine and proline metabolism	10	3	30		0	3	100
blz03420	Nucleotide excision repair	10	3	30		0	3	100
blz03410	Base excision repair	7	1	14.3		0	1	100
blz00650	Butanoate metabolism	7	1	14.3		0	1	100
blz00020	Citrate cycle TCA cycle)	8	3	37.5		0	3	100
blz00061	Fatty acid biosynthesis	7	1	14.3		0	1	100
blz01212	Fatty acid metabolism	7	1	14.3		0	1	100
blz00561	Glycerolipid metabolism	7	4	57.1		0	4	100
blz01501	beta-Lactam resistance	7	1	14.3		0	1	100
blz00480	Glutathione metabolism	7	2	28.6		0	2	100
blz00564	Glycerophospholipid metabolism	6	2	33.3		0	2	100
blz00280	Valine, leucine and isoleucine degradation	6	1	16.7		0	1	100
blz00071	Fatty acid degradation	5	2	40		0	2	100
blz00261	Monobactam biosynthesis	4	2	50		0	2	100
blz00310	Lysine degradation	3	2	66.7		0	2	100
blz00511	Other glycan degradation	3	2	66.7		0	2	100
blz04122	Sulfur relay system	3	2	66.7		0	2	100
blz00410	beta-Alanine metabolism	2	2	100		0	2	100
blz00625	Chloroalkane and chloroalkene degradation	2	1	50		0	1	100
blz00380	Tryptophan metabolism	2	1	50		0	1	100
blz00332	Carbapenem biosynthesis	2	1	50		0	1	100
blz00472	D-Arginine and D-ornithine metabolism	1	1	100		0	1	100
blz00740	Riboflavin metabolism	1	1	100		0	1	100
blz00541	O-Antigen nucleotide sugar biosynthesis	6	1	16.7		0	1	100

## Sheet: K09_K05
Locus	Pathways	N all_genes	N K09/K05_all DEGs	Delta (All_DEGs/All_genes)	N upregulated	Delta Upper: (GT15_st/GT15_ex)/All_DEGs	N downregulated	Delta Down: (GT15_st/GT15_ex)/All_DEGs
blz00400	Phenylalanine, tyrosine and tryptophan biosynthesis	19	1	5.3	1	100		0
blz00030	Pentose phosphate pathway	17	2	11.8	2	100		0
blz00760	Nicotinate and nicotinamide metabolism	14	2	14.3	2	100		0
blz00340	Histidine metabolism	11	5	45.5	5	100		0
blz00670	One carbon pool by folate	10	2	20	2	100		0
blz00450	Selenocompound metabolism	10	1	10	1	100		0
blz00040	Pentose and glucuronate interconversions	9	5	55.6	5	100		0
blz03018	RNA degradation	10	3	30	3	100		0
blz00660	C5-Branched dibasic acid metabolism	7	2	28.6	2	100		0
blz00790	Folate biosynthesis	7	1	14.3	1	100		0
blz00460	Cyanoamino acid metabolism	4	1	25	1	100		0
blz00051	Fructose and mannose metabolism	4	2	50	2	100		0
blz00401	Novobiocin biosynthesis	4	1	25	1	100		0
blz00360	Phenylalanine metabolism	4	1	25	1	100		0
blz00350	Tyrosine metabolism	4	1	25	1	100		0
blz02060	Phosphotransferase system PTS)	3	1	33.3	1	100		0
blz00520	Amino sugar and nucleotide sugar metabolism	27	8	29.6	7	87.5	1	12.5
blz00500	Starch and sucrose metabolism	25	8	32	7	87.5	1	12.5
blz01210	2-Oxocarboxylic acid metabolism	21	3	14.3	2	66.6667	1	33.3333
blz00052	Galactose metabolism	20	3	15	2	66.6667	1	33.3333
blz00290	Valine, leucine and isoleucine biosynthesis	11	3	27.3	2	66.6667	1	33.3333
blz01100	Metabolic pathways	342	69	20.2	41	59.4203	28	40.5797
blz00230	Purine metabolism	37	7	18.9	4	57.1429	3	42.8571
blz01230	Biosynthesis of amino acids	95	16	16.8	9	56.25	7	43.75
blz01110	Biosynthesis of secondary metabolites	166	27	16.3	14	51.8519	13	48.1481
blz01200	Carbon metabolism	46	6	13	3	50	3	50
blz00270	Cysteine and methionine metabolism	27	4	14.8	2	50	2	50
blz02020	Two-component system	17	6	35.3	3	50	3	50
blz03060	Protein export	12	2	16.7	1	50	1	50
blz00680	Methane metabolism	11	2	18.2	1	50	1	50
blz00750	Vitamin B6 metabolism	7	2	28.6	1	50	1	50
blz00053	Ascorbate and aldarate metabolism	2	2	100	1	50	1	50
blz00250	Alanine, aspartate and glutamate metabolism	19	5	26.3	2	40	3	60
blz02010	ABC transporters	53	11	20.8	4	36.3636	7	63.6364
blz01120	Microbial metabolism in diverse environments	77	12	15.6	4	33.3333	8	66.6667
blz01240	Biosynthesis of cofactors	56	9	16.1	3	33.3333	6	66.6667
blz00630	Glyoxylate and dicarboxylate metabolism	14	3	21.4	1	33.3333	2	66.6667
blz00220	Arginine biosynthesis	12	3	25	1	33.3333	2	66.6667
blz00910	Nitrogen metabolism	6	3	50	1	33.3333	2	66.6667
blz03010	Ribosome	63	20	31.7	6	30	14	70
blz00970	Aminoacyl-tRNA biosynthesis	75	7	9.3	2	28.5714	5	71.4286
blz03440	Homologous recombination	22	4	18.2	1	25	3	75
blz00010	Glycolysis / Gluconeogenesis	20	4	20	1	25	3	75
blz00260	Glycine, serine and threonine metabolism	20	4	20	1	25	3	75
blz03030	DNA replication	13	4	30.8	1	25	3	75
blz00770	Pantothenate and CoA biosynthesis	11	4	36.4	1	25	3	75
blz00240	Pyrimidine metabolism	23	6	26.1	1	16.6667	5	83.3333
blz02024	Quorum sensing	41	10	24.4	1	10	9	90
blz00550	Peptidoglycan biosynthesis	17	1	5.9		0	1	100
blz00620	Pyruvate metabolism	15	1	6.7		0	1	100
blz03430	Mismatch repair	13	2	15.4		0	2	100
blz00300	Lysine biosynthesis	11	1	9.1		0	1	100
blz00190	Oxidative phosphorylation	12	1	8.3		0	1	100
blz00330	Arginine and proline metabolism	10	1	10		0	1	100
blz03070	Bacterial secretion system	9	1	11.1		0	1	100
blz03420	Nucleotide excision repair	10	3	30		0	3	100
blz00900	Terpenoid backbone biosynthesis	9	3	33.3		0	3	100
blz00730	Thiamine metabolism	8	2	25		0	2	100
blz03410	Base excision repair	7	1	14.3		0	1	100
blz00650	Butanoate metabolism	7	1	14.3		0	1	100
blz00020	Citrate cycle TCA cycle)	8	1	12.5		0	1	100
blz00061	Fatty acid biosynthesis	7	1	14.3		0	1	100
blz01212	Fatty acid metabolism	7	1	14.3		0	1	100
blz00561	Glycerolipid metabolism	7	2	28.6		0	2	100
blz01501	beta-Lactam resistance	7	2	28.6		0	2	100
blz00564	Glycerophospholipid metabolism	6	2	33.3		0	2	100
blz00280	Valine, leucine and isoleucine degradation	6	1	16.7		0	1	100
blz00071	Fatty acid degradation	5	2	40		0	2	100
blz01502	Vancomycin resistance	5	1	20		0	1	100
blz00521	Streptomycin biosynthesis	4	1	25		0	1	100
blz00310	Lysine degradation	3	1	33.3		0	1	100
blz00511	Other glycan degradation	3	2	66.7		0	2	100
blz00410	beta-Alanine metabolism	2	2	100		0	2	100
blz00625	Chloroalkane and chloroalkene degradation	2	1	50		0	1	100
blz00380	Tryptophan metabolism	2	1	50		0	1	100
