# Supplementary figures and images for: The Gene Expression Profile Differs in Growth Phases of the Bifidobacterium Longum Culture
Source: MDPI journal article supplement (doi:10.3390/microorganisms10081683), 2022-08-21

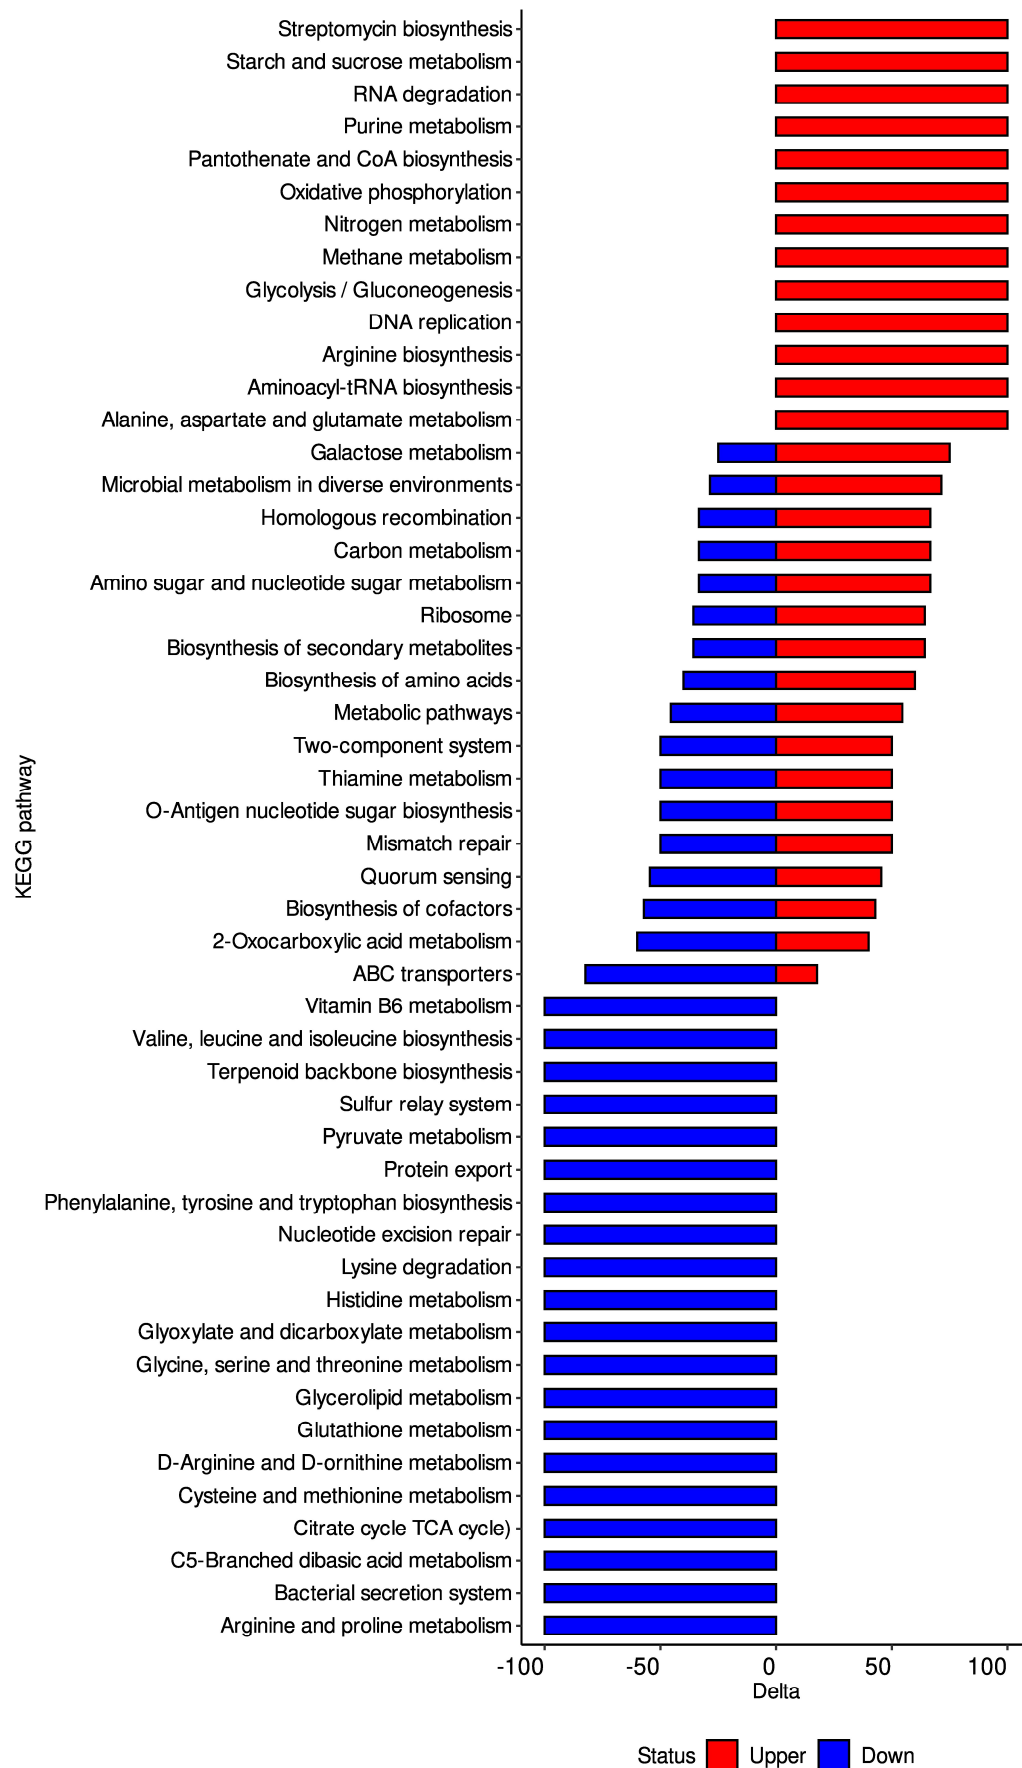

Figure S1: KEGG\_pathway (GT15\_ex compared to GT15\_lag)

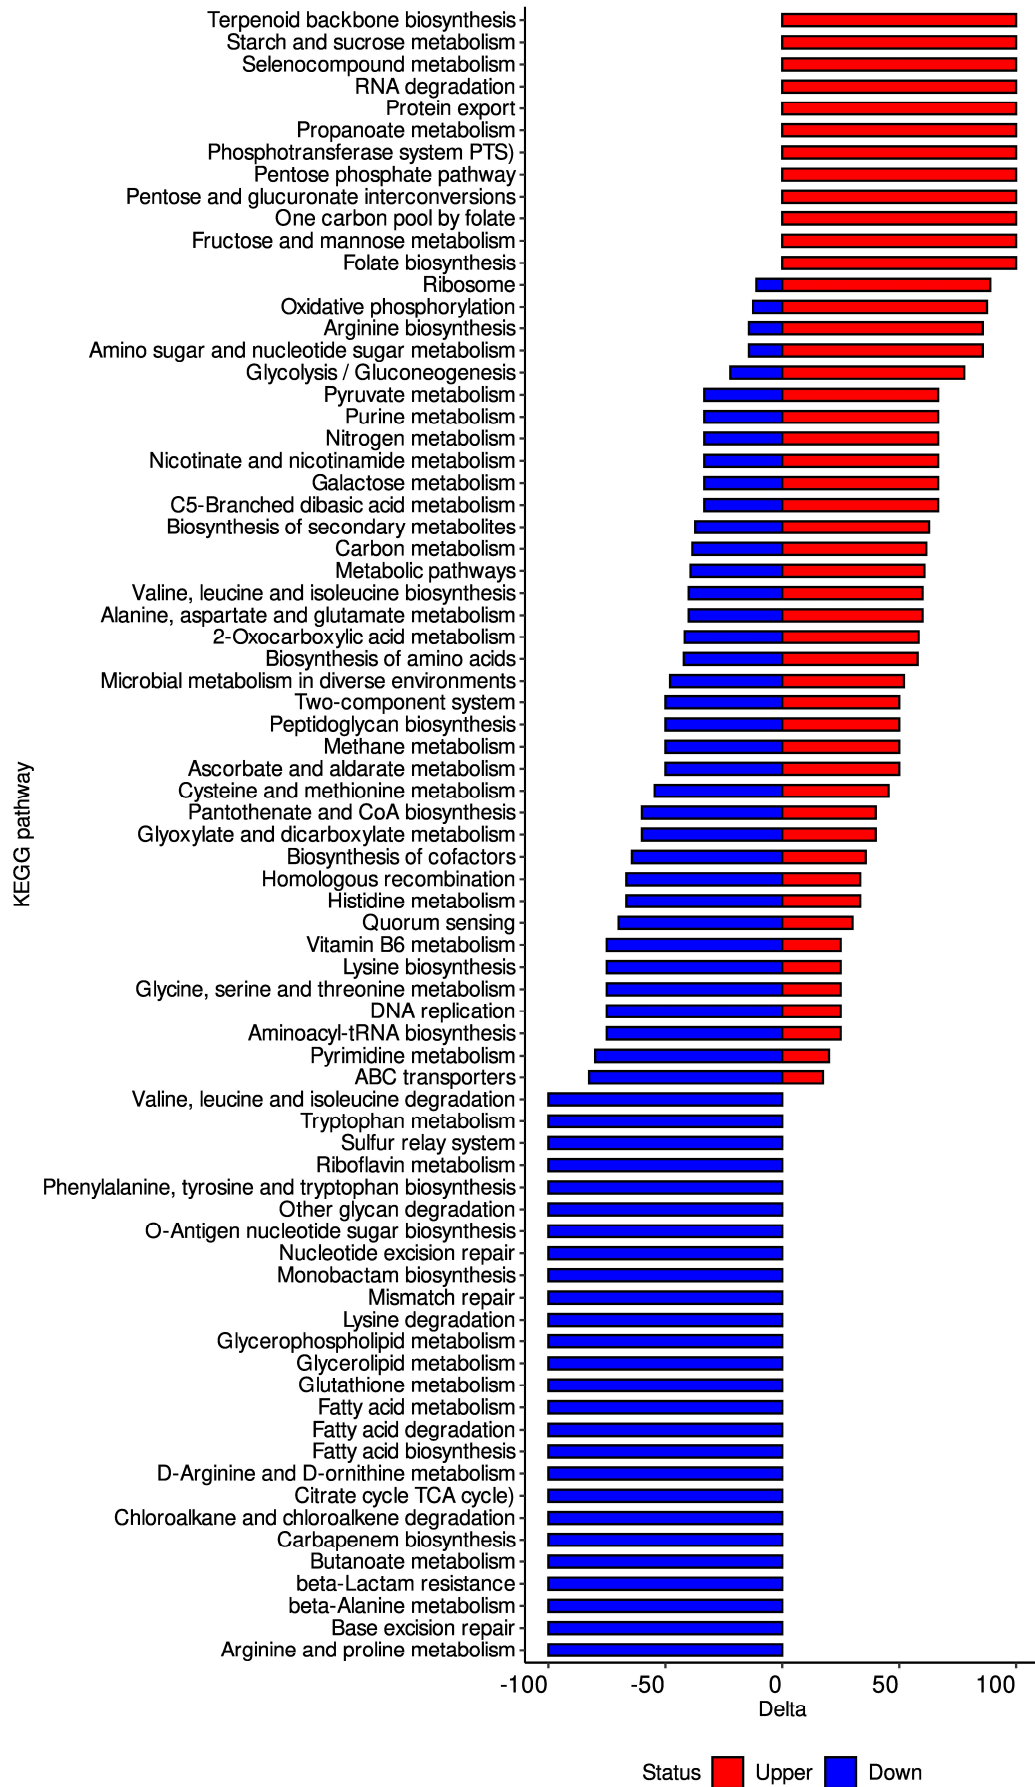

Figure S2: KEGG\_pathway (GT15\_st compared to GT15\_lag)

Supplement: s1 [file s1]
